# Supplementary material for: Multiomics analysis elucidated molecular mechanism of aromatic amino acid biosynthesis in Akebia trifoliata fruit
Source: Front Plant Sci. 2022 Nov 8;13:1039550. doi: 10.3389/fpls.2022.1039550 (PMC9680012; doi:10.3389/fpls.2022.1039550)
Supplement: Supplementary file 1 [file DataSheet_1.xlsx]

## Sheet: Sheet3
Table S1. Primers of ASP5 (EVM0012020) gene cloning
Primer name	Sequences
Primer1-F	ATGGCTTCAACGATACTTTCTCTCG
Primer1-R	AACGACATTGTAAAACGAATCAAGG
Primer2-F	ggacagggtacccggggatccATGGCTTCAACGATACTTTCTCTCG
Primer2-R	ggtactagtgtcgactctagaAACGACATTGTAAAACGAATCAAGG

## Sheet: Sheet1
Table S2. Relative contents of metabolites in A. trifoliate fruit
Compounds	Class	KEGG ID	KEGG_map	Samples ID	FM-1-1	FM-1-2	FM-1-3	SM-1-1	SM-1-2	SM-1-3	RM-1-1	RM-1-2	RM-1-3	FM-2-1	FM-2-2	FM-2-3	SM-2-1	SM-2-2	SM-2-3	RM-2-1	RM-2-2	RM-2-3	FM-3-1	FM-3-2	FM-3-3	SM-3-1	SM-3-2	SM-3-3	RM-3-1	RM-3-2	RM-3-3	FM-4-1	FM-4-2	FM-4-3	SM-4-1	SM-4-2	SM-4-3	RM-4-1	RM-4-2	RM-4-3
				Tissues	Flesh	Flesh	Flesh	Seed	Seed	Seed	Rind	Rind	Rind	Flesh	Flesh	Flesh	Seed	Seed	Seed	Rind	Rind	Rind	Flesh	Flesh	Flesh	Seed	Seed	Seed	Rind	Rind	Rind	Flesh	Flesh	Flesh	Seed	Seed	Seed	Rind	Rind	Rind
				Stages	1(Young)	1(Young)	1(Young)	1(Young)	1(Young)	1(Young)	1(Young)	1(Young)	1(Young)	2(Enlargement)	2(Enlargement)	2(Enlargement)	2(Enlargement)	2(Enlargement)	2(Enlargement)	2(Enlargement)	2(Enlargement)	2(Enlargement)	3(Colouring)	3(Colouring)	3(Colouring)	3(Colouring)	3(Colouring)	3(Colouring)	3(Colouring)	3(Colouring)	3(Colouring)	4(Maturity)	4(Maturity)	4(Maturity)	4(Maturity)	4(Maturity)	4(Maturity)	4(Maturity)	4(Maturity)	4(Maturity)
N-sinapoyl hydroxycoumarin	Coumarins	-	-		4.1	11.7	22.5	45.6	42.6	100	0	0	0	4.8	2.9	0	52.1	25.5	23.4	0	0	0	0	0	0	35.4	22	42.1	0	0	0	0	0	0	26.9	24.3	19.6	0	0	0
O-Sinapoyl quinic acid	Quinate and its derivatives	-	-		18.4	72.8	41.5	61.4	54	52.9	0	0	0	69.6	38.1	57.6	61.4	65.2	44.4	0	0	0	19.7	60.9	10.9	49.2	45.3	100	0	0	0	14.1	19.7	38.6	50.2	37	29.8	0	0	0
Sinapoyl malate	Organic acids	C02887	ko00940		51.4	45.1	57.1	19.8	10.1	9.6	58.1	40.4	12.1	86.6	62.1	88.7	23.7	18.5	15.3	24.5	22.4	40	76.5	100	81.1	22.1	19.9	28.6	22.7	29.5	42.8	15.9	13.1	22	16.6	9.9	14.5	35.8	18	39
methylQuercetin O-hexoside	Flavonol	-	-		9.9	35.3	8.3	1.1	1.5	1.2	69	70.6	59.4	0.9	4.1	0.6	1	1.2	1.2	83.8	82.2	64.5	0.3	0.3	0.2	2.5	1.4	0.7	64.5	54.8	19	0.1	0.3	2.2	0.6	0.6	1	87.8	39.6	100
Selgin 5-O-hexoside	Flavone	-	-		9.6	28	7.5	0.8	1	0.6	68.2	85.1	66.1	1.1	4.9	1.1	0.9	0.8	0.5	72.7	97.2	73.1	0.4	0.6	0.2	1.7	1.1	0.4	83.2	83.5	19.5	0.4	0.2	1.1	0.4	0.5	0.8	78.1	53.9	100
Chrysoeriol 5-O-hexoside	Flavone	-	-		3.6	15.4	7.7	28.2	16.2	17.2	31.6	49.1	32.4	3.4	4.1	3.3	13.9	17.3	17.3	58.8	74.9	51.1	1.1	0	0	18.6	14.2	6.7	48.5	64	12.3	0	1.3	0	8.6	8.8	9.1	71.8	32.6	100
14,15-Dehydrocrepenynic acid	Lipids_Fatty acids	-	-		0.4	0.3	0.3	2.4	1.3	1.2	0	0	0.8	0.5	0.5	0.2	7.2	7.1	6.7	3.6	4.8	5	0.2	0.3	0.3	13.3	20.7	31.7	2.6	2.5	0.8	0.2	0.1	0.2	100	94.7	97.4	0.3	1.2	0.2
N', N''-disinapoylspermidine	Phenolamides	-	-		18	15	9.6	1	0.8	0.7	72.8	84	100	2.5	4	3.1	0.6	1.1	0.9	80.6	93.2	77.9	4.1	2.2	2.9	1.4	0	0.8	97.4	57.2	85.3	2.2	1.4	2.1	0.7	0.4	0.9	63.8	72.7	62.2
Naringenin C-hexoside	Flavone C-glycosides	-	-		23.8	14	0	13.7	0	0	67.9	55.9	99.5	0	0	12.7	0	0	0	56.1	77.5	96.6	0	0	0	16	0	0	93.5	74.8	100	6.9	0	0	0	0	0	48.2	62.6	65.2
Selgin O-malonylhexoside	Flavone	-	-		7.9	20.1	5	1.8	0.8	0.8	56.9	47.7	31.1	1.1	2.7	0.7	0.7	0.7	0.6	100	49.4	36.3	0.4	0.5	0.6	1.5	0.7	0.9	34.8	50.5	46.4	0.8	0.3	1.3	0.2	0.2	0.5	66	36.2	89.4
Naringenin O-malonylhexoside	Flavanone	-	-		24.8	57.4	19.3	3.7	3	3	96.1	84.5	80.6	2.1	12.1	2.2	1.9	2	2.5	85.5	61.3	56.8	1.1	1	0.8	3.5	2.4	3.4	53.9	51.6	61.9	8.8	1	5.3	2.1	1.2	3.1	80.3	62.6	100
Tricetin O-malonylhexoside	Flavone	-	-		3.8	15.1	4.5	0	0	0	19.2	25.3	25.3	0.7	2.5	0.5	1.8	0	2.3	15.6	28.2	22.2	0	0	0	0	0	0	29.5	15.6	11.7	1.2	0	2.8	1.3	1.8	2.7	61.9	36.5	100
Nicotinic acid-hexoside	Nicotinic acid derivatives	-	-		9.8	10	9.2	14.3	9.8	12.3	7.5	8.5	10	53.5	20.8	23.6	10.8	14.5	12	46.9	24.9	23.7	38.6	34.2	86.2	22.2	12.8	8.2	31.7	34.3	100	51.3	55.2	67.9	15.8	22.9	20.3	60.5	64.8	64.2
Dihydrojasmone	Others	-	-		0	0	0	0	9.9	11.2	0	0	0	0	23.7	0	43.3	49.5	38.7	0	0	0	0	0	0	53	50.8	51.1	0	0	0	16.7	0	0	73.1	89	100	22.2	27.4	25.6
Histidinol	Others	C00860	ko00340,ko01100,ko01110,ko01230		96.6	100	98.5	77.7	78.3	83.2	86.5	90.5	86.1	96.8	97.1	98.5	93.1	86.5	87.2	77.5	79.2	79.2	77.9	92.4	93.3	87.8	86.3	84.8	79.8	84	58.7	96.6	94.1	90.3	84	85.5	86.9	69.7	65.5	73.9
Nicotinate ribonucleoside	Nicotinic acid derivatives	C05841	ko00760,ko01100		38.4	30.6	39.3	20.8	30.8	28.3	24.2	19.2	24.9	45.4	70.1	76	29.7	32	33.3	36.8	38.8	42.9	100	99.5	58.9	40.9	42.2	48.2	49.1	45.4	30.8	53.4	55.3	48.9	79.5	70.5	68.5	32.6	51.8	59.8
9-Hydroxy-(10E,12Z,15Z)-octadecatrienoic acid	Lipids_Fatty acids	-	-		0.7	0.8	0.6	10.6	6	2.1	0.5	0.5	0.6	0.6	0.4	0.4	6.6	7.8	5.9	0.6	0.8	0.8	0.4	0.4	0.6	17.2	32.1	31.8	0.7	0.9	0.9	0.2	0.5	0.4	90.8	54.6	100	0.6	1.3	0.4
1-O-Feruloyl quinic acid	Quinate and its derivatives	-	-		5.3	14.4	5.4	4	3.5	2.9	29	34	48.2	1.8	4.2	3.9	1.6	1.5	1.4	39.7	56.8	71.2	2.2	2.3	1.4	1.6	1.2	2.1	54.9	66.9	82.1	0.9	0.6	1.9	0.8	0.7	1.2	68.5	55.6	100
Chrysin O-hexoside	Flavone	-	-		75.4	67.7	58.3	0	0	0	0	0	0	9.7	22.7	11.9	0	0	0	0	72.1	100	14.3	10	0	0	0	0	0	92.9	18	10.8	9.9	13.2	0	21.5	0	64.8	72.3	25.8
sn-Glycero-3-phosphocholine	Cholines	C00670	ko00564,ko00565,ko05231		1.6	2	1.5	1.2	2.9	3	0.2	0.1	0.1	2.5	3.7	1.6	9.4	18.8	11.3	0	0.2	0	2.2	1.6	36.3	16.3	13.9	89.6	0.2	0	0.9	30.3	23.4	16.8	100	76.3	69	0.8	1.4	1.6
Methylglutaric acid	Organic acids	-	-		22.2	14.4	12.1	100	99.1	80.1	0	0	0	36.6	40.5	34.6	66.5	57.3	49.8	0	0	0	25.1	48.2	93.1	64.4	55.9	48	0	0	7	7	7.6	0	35	45.2	16.5	0	10.6	5.9
5-O-p-Coumaroylquinic acid	Quinate and its derivatives	-	-		8	24.3	17.1	65.9	79.2	100	12.7	11.8	11	5.7	1.4	1.7	26.1	19.1	16.5	42.1	46.2	30.4	0	0	22.4	10	7.7	9	19.3	10.8	8.3	36.2	15.1	45.1	3	3.6	3.6	19	13	11.4
Luteolin 6-C-glucoside	Flavone C-glycosides	-	-		0	17	13	11	0	0	55.4	49.2	56.2	0	11.3	0	15.6	13	16.5	83.3	100	79.1	0	0	0	19.2	16.5	0	71.7	40.3	43.8	0	0	0	0	0	0	75.2	42.6	93.8
C-hexosyl-apigenin O-hexosyl-O-hexoside	Flavone C-glycosides	-	-		9.9	23.3	0	12.2	11.8	0	36.6	55.8	52.2	0	0	0	0	0	0	62.2	62.5	59.3	4.6	0	0	0	0	0	63.7	58.7	17.3	0	0	0	5.8	0	0	43.1	31.9	100
C-pentosyl-chrysoeriol 7-O-feruloylhexoside	Flavone C-glycosides	-	-		0	11.9	0	10.2	0	0	18.1	20.6	45.4	0	0	0	0	6.5	5.3	0	96.5	88.6	0	0	0	5.4	4.1	0	55.9	100	50.7	0	0	0	0	0	0	55.9	77.3	76
Caffeic acid O-glucoside	Hydroxycinnamoyl derivatives	-	-		1.7	2.5	2.3	0.8	0.8	0.9	6.7	7.1	7.9	1.4	1.6	1.6	0.5	0.8	0.7	7.8	14.3	20.9	1.7	1.5	3.2	0.8	0.5	1.6	20.8	29.6	100	0.8	0.9	1.1	0.5	0.4	0.4	19.4	19.7	23.6
Tricin O-glycerylhexoside	Flavone	-	-		16.7	0	7.7	0	0	0	46.2	46.9	67.1	14.2	0	0	0	0	0	62	65.8	50.3	9.4	0	9.9	7.3	0	0	66.1	49.3	100	0	0	0	0	0	0	68.5	39.4	32.5
6-Hydroxymethylherniarin	Hydroxycinnamoyl derivatives	-	-		33.8	23.4	22.9	18.4	13.4	11.1	27.7	40.1	32.2	35.6	28.4	29.6	25.5	27	22.7	100	50.8	43.2	17.3	25.7	28.2	39.7	24.4	35.5	38.8	58.2	88.3	21	11.8	12.5	26.7	18.8	24.5	59.9	43.4	76
E-3,4,5'-Trihydroxy-3'-glucopyranosylstilbene	Others	-	-		2.6	4.8	2.3	7.7	2.6	6.5	19.7	21.1	23.5	0	0	0	0	0	0	83.7	59.7	71.8	0	0	0	0	0	0	85.3	93	18.3	0	0	0	0	0	0	69.7	54.1	100
Isorhamnetin O-hexoside	Flavonol	-	-		28.1	61.3	20.3	6.8	5.8	2.7	78.9	71.4	74.4	2.9	7.9	1.4	2.8	4.5	4.2	85.7	74.1	68.8	0.6	0.7	0.7	5.9	4	3.6	63.2	63.5	47.7	11.1	1	8.9	1.7	1.2	3.2	98.1	82.3	100
Benzamide	Others	C09815	ko00627,ko01120		10.4	6	0	11.1	0	0	0	0	0	0	0	10.8	6.6	0	14.4	12	7.9	9.5	7.5	9.8	0	14.9	16.1	0	21.3	40.4	45.4	14.8	0	12.1	6.7	5.7	4.3	100	94.4	80.5
Feruloyl syringic acid	Hydroxycinnamoyl derivatives	-	-		82.1	46	34.1	32.9	33.4	0	89.6	70.9	58.4	19.7	28.3	29.1	13.9	22.2	20.5	65.1	96.6	65.4	28.6	22.3	47.5	20.9	17.4	0	100	56.4	89.8	49.9	30.5	30.5	0	0	0	72.9	65.4	57.9
3-Hydroxykynurenine	Amino acid derivatives	C02794	-		90.8	51.5	0	52.7	0	63.5	75.9	67.4	98.2	24.5	35.4	39.5	48.7	47.6	39.5	84.7	48.3	85.9	43.3	40.4	55.2	61.9	46.3	41.5	72.8	71.7	89.6	41.2	37	29.3	56.3	58.1	54	97.9	81.6	100
delta-Tridecalactone	Lipids_Fatty acids	-	-		59.2	49.2	45.7	0.1	21.1	15.7	100	62.8	90.4	0.1	24.8	0.1	0.1	0.1	0.1	84.1	98.7	48	32.1	0.1	0.1	0.1	0.1	0.1	72.6	86.6	0.1	0.1	0.1	0.1	0.1	0.1	0.1	70.7	61.7	68.8
Caffeic aldehyde	Hydroxycinnamoyl derivatives	C10945	ko00940,ko01110		28.5	31.9	29.3	100	82.2	42.6	19	31.3	26.9	0	10.6	0	0	38.6	55.4	0	21.3	0	0	0	0	47.9	50.8	47.9	23.6	0	29.3	0	0	0	64.5	81.8	56.2	25.3	0	29.8
MAG (18:4) isomer1	Lipids_Glycerolipids	-	-		5.2	0	0	0	0	0	0	0	14.1	0	0	0	28.4	23.1	19.7	24.1	19.8	34.9	0	0	0	32.3	37.2	71.3	23.6	22.7	0	0	0	0	80	85.1	100	0	0	0
DGMG (18:2) isomer2	Lipids_Glycerolipids	-	-		14.5	21.2	16.4	6.8	3.7	5.8	50.8	53.8	87.1	0.8	7.4	8.7	1.2	1.3	0.7	7.2	73	87.9	5.9	11.2	8	0	0	0	65.1	100	44.8	3.3	3.9	3.7	0	0	0	93.9	62.4	82.6
MAG (18:3) isomer5	Lipids_Glycerolipids	-	-		11.7	16.9	17.5	5.7	3.4	4.3	52.4	64.4	67.7	1	5.7	6.2	1	1.1	0.8	8.1	67.6	79	5.5	6.2	5.3	0.8	0.6	0.3	69.2	93.3	46.6	3.8	3.3	2.4	0.2	0.2	0.2	77.1	69.5	100
DGMG (18:2) isomer1	Lipids_Glycerolipids	-	-		21.3	34.9	63.3	13.3	3.5	4.1	27.4	55	49.6	3.3	21.7	24.4	2.4	2.6	2.1	7.1	70.4	77	17.6	19	16.3	1.6	2.3	1.9	55.6	100	34.6	15	15.4	11.1	3.1	2	2.4	64.9	48.1	61.7
DGMG (18:2) isomer3	Lipids_Glycerolipids	-	-		28.9	52.8	82.6	42.7	16.3	22.3	26.3	47.2	39.4	14.1	57.9	53.3	11.4	12.1	10.9	6.9	68.9	51.5	58.2	67.9	36.4	8.8	8.8	10.5	50.7	100	17.5	17.7	17.1	20.6	19.5	10.7	17.9	46.9	33.7	34.9
MAG (18:2) isomer1	Lipids_Glycerolipids	-	-		8.2	12.5	11.2	0	20.1	12.9	32.2	68.1	74.5	0	0	0	0	0	0	16.5	50.6	83.2	11.1	6.9	6.9	0	0	0	80.6	80	44.2	0	0	3.5	0	0	0	74.2	57.7	100
LysoPC 16:1	Lipids_Glycerophospholipids	-	-		13.1	26.8	9.6	100	34.6	43.7	0	0	0	16.8	40	36.9	56.9	50.2	53.9	10.8	41.7	0	32.2	45.8	75.9	32.2	48.1	0	17.3	0	47.8	27	35.3	40	40.7	29.6	26.8	24.3	39	34.2
N2-methylguanosine	Nucleotide and its derivates	-	-		19.3	0	29	88.1	34	65.7	52.3	55.5	49.7	22.5	17.6	13.2	32.3	34.3	34	39.8	43.6	55.5	37.8	21.7	67.2	47.7	33.4	100	42.4	45.1	58.4	63.7	85.2	79.4	39	48	26.4	41.6	36.9	50.9
Xanthine	Nucleotide and its derivates	C00385	ko00230,ko00232,ko01060,ko01065,ko01100,ko01110,ko01120		11.6	29.8	20	90.3	84.4	100	0	7.2	0	8.2	12.1	8.2	68	42	46	4	4.4	9	5.2	6.8	9.6	49.5	28.9	78.1	0	0	11.2	10	5.2	12.8	17.3	20.3	20.2	4.8	9.6	8.4
Kinetin 9-riboside	Phytohormones	-	-		6.3	20.2	11	5.7	30.4	20	39.9	52.9	54.3	6.4	6.1	4.9	19.5	13.1	19.3	60.9	53	57	5.9	4.6	7.3	15.2	12.8	16.6	58.1	49.2	29.5	7.4	6.2	6.8	17.3	18.7	17.3	60.9	53.5	100
O-Feruloyl coumarin	Coumarins	-	-		36.1	42.9	22.2	45.2	47.6	34.8	72.2	100	0	0	0	0	61.9	42.5	44.8	96.8	63.5	54.8	0	0	0	38	38	6.3	38.7	44.4	75	0	0	0	0	0	0	67.5	43.7	82.9
Sinapoylcholine	Cholines	C00933	ko00940		0	32.5	0	41.4	0	0	0	0	0	22.4	17.6	16.5	42.8	77.2	32.6	0	0	0	0	0	0	83.2	43.5	27.8	0	0	0	66.3	24.5	60.7	87.4	64.6	100	0	0	0
p-Aminobenzoate	Benzoic acid derivatives	C00568	ko00627,ko00790,ko01061,ko01100,ko01120		29.1	16.8	25.4	0	6.9	0	68.1	58.8	79	5.6	9.5	9.9	0	0	1.9	53.6	59.7	64.9	8.6	5.9	8.6	1.8	0	3.1	59	50.5	100	7.4	3.8	4.2	0	0	0	41.9	48.4	38
Cholesterol	Others	C00187	ko00100,ko00120,ko00140,ko00981,ko00984,ko01066,ko01100,ko01120,ko04913,ko04925,ko04975,ko04976,ko04977,ko05200,ko05217		58.8	25.3	47.9	40.1	37.8	30.2	49	42.4	45.2	36	47	49.7	35.4	34.2	29.3	100	44.4	81.2	30.3	29.7	31.7	31.9	25.1	39.2	52.2	37.5	41.7	28.3	25	28.5	26.4	35.6	37.2	49.9	48.5	61.5
MAG (18:1) isomer2	Lipids_Glycerolipids	-	-		2.2	4.4	6.1	100	21.1	24.4	1.8	1.5	4.7	4.4	7.4	4.5	30.6	20.5	17.9	10.1	15.8	21.5	11.4	17.1	6.1	14.3	16.4	9.2	12.4	19.2	7.4	4.5	3.4	2.5	12.8	12.8	21.1	15.1	11.6	17.9
2-Aminoethylphosphonate	Others	C03557	ko00440,ko01100,ko01120,ko02010		58	29.3	43.2	49	31.1	53.9	63	51.4	100	38.5	12.6	24.9	17.2	11.6	23.1	84.8	45.7	53.5	0	14	11.4	0	0	0	26.5	63.8	0	0	0	11.6	10	0	8.3	16.7	13.9	0
5-methoxyindole-3-carbaldehyde	Indole derivatives	-	-		19.3	9.9	23.6	0	0	0	22.4	23.5	27.8	8.1	0	0	26	0	12.4	39.5	59.4	31	12.1	13.3	9.5	15.4	15.2	0	38.9	33.5	94	0	0	0	0	0	0	49.1	31	100
Aminopurine	Others	-	-		12	15.5	8.7	100	48.3	47.5	15.8	12.4	14.5	11.1	45.3	31.1	36.7	37.5	35.6	29.2	51.4	37.1	25.2	47.3	28.8	24.5	35.8	19.4	31.5	37.3	29.4	8	7.4	7.2	34.7	31	36.9	14.5	33.9	29.6
Luteolin O-feruloylhexoside	Flavone C-glycosides	-	-		2.3	8.9	7.4	0	4.8	2.5	18.3	15.2	31.8	0	8.5	0	0	0	0	7.8	65.2	60.9	0	0	0	5	2.7	0	63	100	20	0	0	0	0	0	0	39.1	70.5	70.3
O-Feruloyl 4-hydroxylcoumarin	Coumarins	-	-		4.6	7.6	0	0	0	0	37.6	32.9	49.2	0	3.2	2.2	0	0	0	0	59.3	57.4	0	0	0	0	0	0	48.9	54.6	78.3	0	0	0	0	0	0	0	70.3	100
Hydroxy-methoxycinnamate	Hydroxycinnamoyl derivatives	-	-		1.8	5.3	2.4	0.2	0.4	0.2	18.2	18.9	28.9	0	0.8	0.5	0.1	0.4	0.2	6.8	28.6	43.1	0.4	0.3	0.8	0.2	0.2	0.5	32.6	48	45.9	0.6	0.2	0.7	0.1	0.1	0.5	64.3	47.7	100
5-Methoxy-N,N-dimethyltryptamine	Tryptamine derivatives	C08309	-		49.6	25.7	22.1	10.3	10.7	0	60.4	72.2	100	0	0	6.4	11.9	0	0	33.6	81.5	55.2	0	0	0	0	0	11.2	54.7	51.8	0	0	0	0	0	0	0	35.5	21.6	21.6
2-Aminoadipic acid (L-Homoglutamic acid)	Amino acids	C00956	ko00300,ko00310,ko00311,ko01100,ko01110,ko01130,ko01210,ko01230		95	77.9	58.2	15.1	39.5	32.7	30.3	25	22.7	100	86.3	68.7	37.8	49.1	46.7	22.8	25.4	32.8	70.3	60.1	38.3	52.2	42.9	35.9	29.2	33.8	25.2	17.5	16.3	16.2	32.2	31.1	30.3	23.5	19.9	27.6
Aspartic acid di-O-glucoside	Amino acid derivatives	-	-		51.2	50.4	43.4	34.7	81.6	56.3	3.9	3.8	3.2	41.4	33.7	37.6	45.3	63.3	40.6	0	0	0	16.4	36	10.7	43.4	43.8	70.3	0	2.9	0	16	14.6	26.4	81.3	100	88.3	0.8	1.3	2.7
Choline	Cholines	C00114	ko00260,ko00564,ko01100,ko02010,ko04725,ko04976,ko05231		73	89.6	100	89.8	95.7	96.7	59.7	62.3	61.1	70.1	73.9	72.3	88.6	94.5	98.3	54.3	56.9	57.3	60.7	63	73.9	93.6	92.2	82.7	50	55.7	56.6	74.4	74.2	75.4	84.4	89.8	85.3	46.9	53.8	57.3
N-p-Coumaroyl putrescine	Phenolamides	C18326	ko00330		4.7	17.2	8.1	100	0	0	0	0	0	1.7	2.6	0.9	20.9	50.9	40.5	0	0	0	0	0	0	51	32.7	3.1	0	0	0	0.6	0	0	13.5	35.4	24.5	0	0	0
N',N",N"'-p-coumaroyl-cinnamoyl-caffeoyl spermidine	Phenolamides	-	-		31.3	25.3	26.7	100	24.1	15.6	27.6	29.5	34.3	16.7	46.5	57.8	5.7	8.5	6.1	33.8	61	66.9	61.4	46	36.9	11.7	8.4	0	50.1	58.6	34.4	20.6	14.1	24	15.7	6.9	15.7	13.8	50.4	58.2
N',N"-p-coumaroyl-feruloyl putrescine	Phenolamides	-	-		65.5	81.2	45.9	62.4	37	21.3	73.9	92.1	98.8	13.5	15.6	17.9	0	35.9	25.8	86.7	100	89.1	17.3	11.6	0	31.3	33.5	9.2	63	95.2	46.4	13.8	11.6	13.4	25	0	13.2	90.9	66.1	90.9
Agmatine	Phenolamides	C00179	ko00330,ko01100		6.1	7.9	6.4	24.9	23.5	25.9	3	2.2	3	4.1	3.3	2.1	34.5	37.2	43	0	3.3	4.5	2.1	2.2	0	38.5	44.7	4.9	3.6	2.9	0	3.6	3.6	11.5	19.1	23.7	100	2.6	4	8.3
N'-p-Coumaroyl putrescine	Phenolamides	-	-		4.8	19.1	7	100	0	0	0	0	0	2.9	2.8	1.7	23.9	53	37.3	0	0	0	0	0.9	0	43.1	28.9	3.7	0	0	0	0	0	0	10.9	33.7	18.4	0	0	0
Adenosine 3'-monophosphate	Nucleotide and its derivates	C01367	ko00230		8.8	12	7.8	100	44.8	45.6	1.4	1.1	2	8.9	23.3	14.1	34.8	45.2	33.8	1	2.6	0.9	12.3	13	11	31.7	27.9	30.8	0.9	2.2	1.9	8	7	5.5	20.6	23.5	22.1	3.1	6.1	4.3
Rosinidin O-hexoside	Anthocyanins	-	-		0	0	8.8	0	0	0	9.1	0	26	0	0	0	0	0	0	50.1	46.3	50.7	0	0	18.4	0	0	0	31.4	51	100	0	0	0	0	0	0	65.3	52.1	85.7
Luteolin O-hexosyl-O-pentoside	Flavone	-	-		8.9	18.3	14.2	100	63.7	28.9	11	11.9	0	0	0	0	41.1	41.4	40	12.5	8.4	19.8	0	0	0	42.5	23.9	0	9.1	13.2	12.2	4.2	0	0	0	8.6	7.5	0	0	0
Apigenin O-malonylhexoside	Flavone	-	-		12.1	26.5	16.5	100	39.2	63.8	7.5	19.6	15.8	0	0	0	11.5	23.8	18.3	21.7	18.8	17.5	0	0	0	21.4	18.7	0	0	19	6.2	0	0	0	0	0	0	14.3	6.2	30.4
Luteolin O-sinapoylhexoside	Flavone	-	-		9.1	0	14.9	100	48.9	0	0	0	0	26.3	19.7	14.2	57.1	79.9	57.5	0	0	0	11	13.5	8.5	79.7	50.7	26.9	0	0	0	0	9.4	6.5	18.3	15	18.5	0	0	0
Chrysin 5-O-glucoside (Toringin)	Flavone	-	-		39	39.9	86.2	21.6	31.5	29.1	40.1	65.3	98.4	27	34.5	25.8	21.2	25.1	41.3	0	0	0	0	0	0	29.3	31.5	15.8	76.1	0	84.5	11.4	8.3	15.2	52.8	57.5	45.8	72.5	100	43.4
Isorhamnetin 5-O-hexoside	Flavonol	-	-		11	36.4	9.3	1.4	1.5	1.2	65.9	74.1	58	1.1	4.4	0.6	1.3	1.2	1.2	83.4	80	67.8	0.3	0.3	0.2	2.7	1.4	0.7	59	56.1	21.9	0.2	0.2	1.8	0.6	0.5	1.1	85.9	44	100
Chrysoeriol O-hexosyl-O-hexoside	Flavone	-	-		0	22.1	0	0	5.2	0	52.9	57.6	53.4	0	0	0	5.8	0	0	53.4	48	43.5	0	0	0	15.3	0	6.2	48.2	41.6	14.1	0	1.5	5	0	9.6	3.4	91.7	34.1	100
Chrysoeriol O-malonylhexoside	Flavone	-	-		6.6	21.8	4.4	8.5	2.6	5.4	28.6	55.2	43.1	4	5.1	2.5	3.3	4	3.8	100	51.7	36.5	0	3.7	0	5.7	0	0	24.3	33.6	24.3	3.4	2.2	2.5	7.9	5.8	3.3	57.7	22.6	73.7
Hesperetin C-hexosyl-O-hexosyl-O-hexoside	Flavone C-glycosides	-	-		3.1	14.3	13.4	83.2	100	48.8	0	0	0	4	2.2	0	56.9	36.6	58.4	0	0	0	0	0	0	20	26.3	4	0	0	0	0	0	0	0	0	0	0	0	0
8-C-hexosyl-hesperetin O-hexoside	Flavone C-glycosides	-	-		6.7	24.5	14.2	100	64.4	39.8	19.3	27.8	14.2	0.8	2.6	0.5	8.4	42.5	42.4	20.2	21.9	15.1	0.1	0.2	0.3	31.6	35.2	10.7	10.8	10.7	6.1	3.7	0.3	1.7	1.3	0.9	1.1	33.5	9.5	37.8
Chrysoeriol 6-C-hexoside 8-C-hexoside-O-hexoside	Flavone C-glycosides	-	-		0	10.7	0	7.8	0	0	40.5	40.6	27	0	0	0	0	0	0	17.2	50.9	49.5	0	0	0	5.4	0	0	43.3	28.4	0	0	0	0	0	0	0	77.9	23.1	100
C-hexosyl-isorhamnetin O-hexoside	Flavone C-glycosides	-	-		0	79.4	41	52.9	51.1	50.4	0	0	0	14.7	23.3	0	99.2	76.8	89.3	0	0	0	0	0	0	100	69.2	21	0	0	0	0	0	0	0	0	0	0	0	0
6-C-hexosyl-luteolin O-hexoside	Flavone C-glycosides	-	-		14.2	30.7	18.6	100	61.3	37.1	20.2	32	35.1	0	0	0	17.4	55.6	40.4	34.1	45	43.4	0	0	0	35.1	30.3	0	38.1	48	0	0	0	0	0	0	0	62.6	26.4	72.2
Eriodictiol C-hexosyl-O-hexoside	Flavone C-glycosides	-	-		3.1	11.2	4.2	0	0	0	41.2	38.5	28.5	0	0	0	0	0	0	71.8	29.3	13.6	0	0	0	0	0	0	22	26.2	4.5	5.2	1.7	2.4	0	0	0	71.2	29.5	100
6-C-hexosyl luteolin O-pentoside	Flavone C-glycosides	-	-		8.1	25.4	0	0	0	0	84.3	71.8	62.9	0	0	0	0	0	0	72.3	62	37.5	0	0	0	0	0	0	39	71.8	0	0	0	0	0	0	0	82.8	49.5	100
8-C-hexosyl-apigenin O-hexosyl-O-hexoside	Flavone C-glycosides	-	-		0	9.3	6.8	0	8.7	0	54.9	43.5	48.4	0	0	0	0	8.2	0	94.4	52.4	30.1	0	0	0	0	12.1	11.7	43	48.4	25.2	0	0	0	0	5.9	0	79.7	36.7	100
6-C-hexosyl-hesperetin O-hexoside	Flavone C-glycosides	-	-		3	7.7	7.8	100	41.2	48.9	0.5	0.6	0.4	2.5	2.2	0.6	43	52	50.7	1.3	0.6	0.6	0.1	0.2	0.2	50.2	47.5	14.1	0.4	0.3	0.5	1	0.2	0.4	9	6.6	5.2	0.8	0.5	1.2
8-C-hexosyl-luteolin O-pentoside	Flavone C-glycosides	-	-		34.4	43.4	26.7	100	54.7	35.8	25	29.7	37.7	0	17.4	29.5	27.1	38.4	35.1	34.4	36.3	39.6	16.7	23	15.2	40.1	34.4	25.9	33.3	51.2	34.2	0	10.6	15.3	17.6	14.5	0	40.3	27.6	52.4
C-hexosyl-apigenin O-pentoside	Flavone C-glycosides	-	-		5	13.9	5.2	3.3	2.6	3.3	40.3	38.8	42.6	0	1.9	4	0	0	0	71.6	49.7	41.8	0	0	2.6	0	0	0	42.1	100	0	0	0	1.2	0	0	0	64.5	57	87.1
di-C,C-hexosyl-apigenin	Flavone C-glycosides	-	-		16.3	17.1	0	14.5	11.9	12.5	71.9	75.7	81.8	9.9	9.6	0	0	0	0	65.2	84	88.8	0	0	0	0	0	0	85.3	100	22.7	0	0	0	12.6	0	0	85.9	59.4	62
8-C-hexosyl-luteolin O-hexoside	Flavone C-glycosides	-	-		2.9	10.3	1.8	0.4	0.6	0.4	35	35.1	18.4	0.3	1.2	0	0.5	0.4	0.4	87.6	47.8	28.2	0	0	0	1	0.4	0	34.1	34	7.3	0.3	0	1.4	0	0	0.6	67.1	24.6	100
Luteolin 8-C-hexosyl-O-hexoside	Flavone C-glycosides	-	-		9.1	42.4	31.4	91.4	47.1	67	38.5	25.9	22.1	13.6	6.2	1.3	100	73.8	83.9	52.8	27	38.9	1.4	1.4	0.6	54.7	48.5	15.7	17.9	18.7	17.5	1	1.4	1.6	13	10.3	10	44	22.2	71.3
8-C-hexosyl-apigenin O-feruloylhexoside	Flavone C-glycosides	-	-		5	8.4	7.7	0	0	0	15	9.8	26	0	4.4	0	0	0	0	0	36.7	62	0	0	0	0	0	0	39.6	100	29.2	0	0	1.6	0	0	0	33.5	57.8	56.5
C-hexosyl-luteolin O-sinapic acid	Flavone C-glycosides	-	-		3.3	8.2	4.9	100	40.4	30.4	0	0	0	8.7	6.1	3.6	15.7	24.8	21.9	0	1.6	0	2.6	3.1	0	22.4	17.9	11.7	0	0	0	4.1	1.6	1.2	5.4	7.1	4.9	0	0	0
Eriodictyol O-malonylhexoside	Flavanone	-	-		13.3	38.3	8	0	0	0	100	59.9	42.1	0	0	0	0	12.9	0	66	47.2	48	0	0	0	0	9.3	0	49.7	40.6	73.4	0	0	0	10	0	10.3	45.7	22.9	49.2
Quercetin 5-O-malonylhexosyl-hexoside	Flavonol	-	-		6.7	22.8	5.4	19.7	8.9	6.8	47.4	51	22.6	0.7	2.2	0	2.4	6.4	5.3	100	31.6	18.7	0	0	0	4	4.6	1.8	11.5	17.9	32.5	0	0	0	0	0	0	53.9	24	71.6
Quercetin 7-O-malonylhexosyl-hexoside	Flavonol	-	-		4.7	22	19.6	100	38.6	47	0	0	0	3.7	7.2	0	24.4	52.7	55	0	0	0	0	0	0	44.2	30.1	0	0	0	0	0	0	0	7.7	0	3.2	0	0	0
Quercetin 7-O-rutinoside	Flavonol	-	-		25.8	72.2	39.9	85.9	74.2	64.6	79.4	80.4	65.3	7.6	13.5	2	54.3	60.5	57.7	100	78	64.6	1.2	1.4	1.2	55	38.5	37.1	60.5	50.9	47.4	0.7	0.7	5.3	14	7.9	6.1	88.7	30.4	92.1
Tricin 5-O-hexosyl-O-hexoside	Flavone	-	-		0	0	0	20.6	0	9.5	21.2	50.2	55	0	0	0	23.8	17.6	15.5	22.4	42.9	96.5	0	0	0	0	30.7	13.9	91.7	72	83.7	0	0	0	0	14.5	10.3	76.1	100	65.1
Tricin 7-O-hexosyl-O-hexoside	Flavone	-	-		0	0	11.6	100	26	36.1	14.2	27.2	28.5	0	0	0	27.2	35.4	40.1	0	20.6	59.4	0	0	0	49.5	33.2	0	49.5	50.5	49.3	0	0	0	20.3	11.5	18.2	43.8	65.6	38.1
O-Feruloyl quinic acid	Quinate and its derivatives	-	-		0	0	0	3.2	1.9	0	6.3	13.8	10.3	2.8	2.1	3.9	0	0	0	26	36.2	38.5	2.7	0	0	0	0	0	25.4	41.1	82.3	0	0	0	0	0	0	46.8	55.1	100
3-O-Feruloyl quinic acid	Quinate and its derivatives	C02572	-		14.9	18.1	8.8	1.4	1.2	0.6	100	85.3	58.9	2.6	9.4	8.9	0.5	0.6	0.4	86.1	76.4	71.1	5.7	7.6	0.8	0.8	0.4	0.5	43.6	60.3	53.3	2	2.2	3.3	0.2	0.2	0.5	48.3	41.1	83.3
4-Methyl-5-thiazoleethanol	Others	C04294	ko00730,ko01100		49.9	33.1	48.2	79.6	46.5	63	20.5	28	12.6	62.7	75.6	59.1	87.4	72.3	42.6	32.5	31.1	21.8	51.5	62.2	45.4	58	71.1	55.5	38.7	34.2	0	0	14.5	27.7	96.4	100	94.1	40.1	31.9	24.1
N-hexosyl-p-coumaroyl serotonin	Tryptamine derivatives	-	-		6.8	12.7	8.5	6.1	3.7	1.7	81.7	84.5	36.7	4.3	5.1	1.7	7.8	7.4	5.9	21	30.1	36.1	0	0	0	9	6.8	6.8	59.9	100	15.3	0	0	0	4.2	5.8	4.6	55	19.5	65.9
N-hydroxy tryptamine	Tryptamine derivatives	C17203	ko00380		6.9	100	59.9	10.8	0	0	0	0	0	3.9	13	8.8	4.1	10.3	8.9	0	0	0	6.6	7.1	46.7	18.8	10.2	34.5	0	0	0	51.6	35.7	67.7	50.6	50.8	64.2	0	0	0
Piperidine	Alkaloids	C01746	ko00960,ko04974		23.3	44.9	48.6	92.9	97.5	100	9.1	18.1	21.6	14.3	16.5	16.4	30.8	39.1	28.3	5.2	7.3	7.2	18	42.2	44	35.1	31.4	18.9	16.3	45.5	16.2	41.2	40.9	50.5	34.8	25.7	23.4	25.2	22.7	28.1
Isoquinoline	Alkaloids	C06323	-		2.8	1.8	9.4	72.3	31.5	100	0	0	0	4	5.1	0	13	19.6	41.8	0	0	0	0	0	0	52.7	47.1	5	0	0	0	0	0	0	0	0	6.6	0	0	0
Pyridoxine O-glucoside	Vitamins	-	-		30.1	23.8	31.6	14.4	12.9	13.3	68.9	79.2	82.5	18.4	16.2	24.3	15.6	17.8	22.1	91.7	76.2	70.8	25.1	24.7	34.2	22.7	23.6	18.5	77.8	72.6	100	5.6	5.7	11.2	15.3	16.5	13	68	71.8	72.1
Niacinamide	Vitamins	C00153	ko00760,ko01100,ko04212,ko04977		38	46.4	80.4	100	64.1	87.7	21.4	21.6	24.9	78.3	59.4	51.4	48.9	69.2	67	35.4	42.4	38.4	48.9	58.7	60.9	87.3	84.8	64.1	33.7	39.1	44.6	14.7	11	17.1	20.5	31	25.6	27.9	33.8	36.6
4-Pyridoxic acid O-hexoside	Vitamins	-	-		12.5	35.1	18.6	40.9	43.5	37.5	12.7	16	9.4	7.8	21.2	16.8	72.5	100	66.2	27.9	11.2	13	9.9	23.3	35.7	93.7	66.2	92.9	16.9	12.9	41.3	11.4	8.6	19.6	65.4	65.8	95.5	17.4	20.9	21.8
D-Pantothenic acid	Vitamins	C00864	ko00410,ko00770,ko01100,ko01110,ko04977		53.3	33	52.9	12.8	15.1	26.9	58.6	62.9	93.3	34.9	31.9	42.7	7.9	10.1	12.9	67.1	76.7	96.2	40.6	39.2	27	9.9	9.6	8.2	84.3	79.5	76.2	22.2	25.3	31.7	10.8	13.8	11.5	95.7	100	99
Pyridoxine O-feruloyl hexoside	Vitamins	-	-		1.7	10.1	3.4	1.8	0	0	38.5	57.1	68.6	0	1.2	1	0	0	0	10.8	65.2	77.6	0	0	0	0	1.1	1	56.2	76.4	88.2	0	0	0	0	0	0	57.5	54.7	100
6,7-dihydroxycoumarin 6-O-quinic acid	Coumarins	-	-		71.4	77.4	59	45	36.2	30.9	48.4	56.7	41.9	33.8	35.4	19.9	100	75.1	73.3	70	55.3	40.5	17.5	25.2	10.2	76	65.4	43.7	40	41.7	40.7	16.5	11.6	16.1	24.2	26.2	29.5	55.3	24.1	45.6
Methoxyindoleacetic acid	Indole derivatives	C05660	ko00380		7.8	34.4	54.9	73.1	84	100	3.2	14.5	19.1	7.5	6.7	4.5	56.7	66	67.9	2.1	2.1	1.7	6	18.3	18.1	87.2	84	52.9	4.8	13.3	12.8	49	66	76.9	87.8	95.5	89.1	22.3	16.7	20.8
3-Indoleacetonitrile	Indole derivatives	C02938	ko00380		0	31.8	45.1	31.7	42.3	75.1	0	14.7	20.4	0	0	0	64	61.7	39.5	0	0	0	0	20.8	25.5	84.2	64	42.3	10.3	17.5	0	42.3	48.6	63.2	79.4	100	86.2	27.5	16	38.2
Phosphoric acid	Organic acids	C00009	ko00190,ko00195,ko01100,ko02010,ko02020,ko02024,ko04111,ko04978,ko05012		30.5	42.2	30	18.6	23.5	25.6	13.7	14.9	7.8	29.4	57	49.7	45.4	67.1	52.3	7.2	14.3	7.1	51.7	44.5	46.8	55.2	50.3	82.8	5.4	7	19.5	37	45.7	54.6	100	93.8	69.2	20	15	16
Procyanidin A3	Proanthocyanidins	-	-		2.3	51.6	23.3	86.5	72.6	85.7	0	0	0	23.1	18.9	6.9	89.7	100	96.4	0	0	0	0	0.8	0	82.9	69	13.8	0	0	0	1.5	0	0	9.6	10.8	11.9	0	0	0
LysoPC 16:1 (2n isomer)	Lipids_Glycerophospholipids	-	-		3.7	6	3.7	100	36.8	33.2	1.4	2.2	0.9	1.9	2.8	2.4	20.9	18.3	13.5	1.5	3	2	2	3.7	4.8	12.9	21.1	69.5	2.3	1.3	2.4	3.6	5.5	4.9	17	15	11.7	1.3	1.6	1.5
LysoPC 18:2	Lipids_Glycerophospholipids	-	-		8.5	13.1	9	100	35.5	39.7	3	2.6	2.8	7.9	14.7	15.1	26.8	32.4	25.7	8.4	19	13.2	13.2	19.1	32.5	22	21	15.4	8.3	8.2	24.4	9.4	12.9	16.4	10.2	6.2	8.3	11.2	15.2	15.5
LysoPC 18:3	Lipids_Glycerophospholipids	-	-		3.5	7.6	4.2	100	38.7	21.5	0.6	0.7	0.5	4	8.5	8.2	29.4	29.9	21.4	1.4	6.2	3.8	7.3	9.2	28.4	20.2	21.2	18	2.6	2.1	8.9	7.6	11.6	13.7	14.6	9.4	11.4	3.3	7.5	5.2
LysoPC 16:0	Lipids_Glycerophospholipids	-	-		12.7	24.8	14.5	100	66.1	57.7	2.4	2	1.6	14.1	27.8	28	57.7	57.9	46.5	3.8	17.8	10.4	22.2	30.1	58.3	45.5	45.5	43.9	8.1	5.5	24.6	22.8	31.5	35.8	36.4	27.2	33.1	10.6	21.9	15.8
LysoPC 18:1 (2n isomer)	Lipids_Glycerophospholipids	-	-		2.5	5	3.2	100	69.9	76.7	0.8	1	0.5	0.7	1.6	0.9	40.9	36.1	31.3	1.7	1.5	1.2	0.5	0.8	1.3	30.4	36.3	28.5	1.2	0.6	1	1.1	1.9	1.9	36.1	27.2	28.1	0.4	1.1	0.7
LysoPC 16:2 (2n isomer)	Lipids_Glycerophospholipids	-	-		5.9	5.1	3.7	40.1	16.8	14.9	1.8	2.3	0	2.2	8.4	7.5	13.4	10.1	7.4	1.4	3.2	0	6	11.4	37.6	11	14.4	100	2.3	0	6.4	11.4	20	19	21.4	18.1	13.6	2.4	0	2.5
LysoPE 14:0	Lipids_Glycerophospholipids	-	-		1.4	2.9	1.4	100	18.1	11.6	0	0	0	0.9	3	1.6	14	15.3	11.1	0.7	2.7	0	1.8	1.8	6.4	10.1	12.2	1.4	1	0.7	1.2	5.1	7.8	9.7	1.6	0.7	1.1	1	1.2	0.8
LysoPC 18:3 (2n isomer)	Lipids_Glycerophospholipids	-	-		20.6	18.9	9	100	42	30.6	20.5	36.2	19.2	7.3	16.2	17.4	22.3	24.4	18.6	23.5	52.9	41.1	14.3	23	32.9	18.1	16.1	9.5	35.3	23.5	36.2	22.8	34.8	29.6	9.8	8.3	8.3	28	36.8	38.3
LysoPC 14:0	Lipids_Glycerophospholipids	-	-		1.9	6.1	4.6	100	34.1	30.1	0.2	0.2	0	1.6	4.5	3.2	25.3	20.7	15.4	0.6	2	1.3	1.7	2.5	15.1	12.2	17.3	24	0.8	0.7	1.3	5.7	6.5	9.9	33.6	22.9	15.9	0.8	1.4	1.2
LysoPC 18:2 (2n isomer)	Lipids_Glycerophospholipids	-	-		4.6	7	3.9	100	52.6	50	2.2	3.6	1.5	2.5	4.7	5	20.3	19.1	15.6	2.5	5.1	3.9	3.6	5.8	13.8	15.3	17.6	15.8	3.3	1.8	5.8	7	12.5	12.2	13.9	10.6	12.3	3.1	4.4	4.1
LysoPE 18:2 (2n isomer)	Lipids_Glycerophospholipids	-	-		2.4	3	1.5	100	18.6	16.5	1.2	1.5	1.1	2.1	4.2	5	15.5	22.5	15.3	3.9	8.8	5.3	4.1	7.5	10.2	12.2	8.4	0.6	2.9	2.6	12.3	5.2	9.1	11.4	0.2	0.1	0.1	4.8	5.1	4.8
LysoPC 18:1	Lipids_Glycerophospholipids	-	-		1.8	4.2	2.9	100	24.4	32.9	0.7	0.6	0.5	1	2	1.4	17.9	23	18.9	1.7	3.7	2.7	1.2	1.9	4.8	15.4	17.1	8.1	1.5	1.6	3.5	1.1	1.7	2	6.4	4	4.3	1.6	2.7	2.7
LysoPE 18:0	Lipids_Glycerophospholipids	-	-		1.9	3.2	0.6	100	21.1	3.3	1.2	1.3	0.6	0.3	0.3	1.6	5.6	6.4	3.8	2.8	8.8	5.2	0.8	0.9	0.8	6	6.7	0	2.4	0.5	9	0.5	0.6	1.2	0	0	0	2.6	3.4	4.5
Punicic acid	Lipids_Fatty acids	C08364	-		1.2	1.1	1	32.8	20.1	5.3	0.4	0.6	0.9	0.7	0.6	0.8	6	7.7	5.2	1.2	1.5	1.7	0.6	1.5	1.2	11.7	19	35.1	1.4	1.5	1.4	0.4	0.8	0.6	88.5	81.3	100	0.7	1.9	0.6
MAG (18:2)	Lipids_Glycerolipids	-	-		16.6	13.5	10.9	100	46.5	23	4.2	6	18.9	5.2	11.2	14.2	16.7	16.5	18.2	8.7	19.3	17.2	12	15.1	57.2	16.9	18.4	3.6	31.4	53.5	20.8	37.9	46.5	32.2	9.5	6.3	11.2	14.6	54.3	16.6
trans-zeatin N-glucoside	Phytohormones	-	-		29.4	38.1	19.9	8.7	9.2	20.1	54.4	62.7	33.7	23.4	27.7	36	39.6	37.3	64.8	100	43.6	40.6	26.9	44.3	40.5	41.3	54.2	15.5	50.1	40.8	38.3	46.3	58.4	61.5	32.7	53.2	41.3	31.5	54.4	69.7
N-Feruloyl putrescine	Phenolamides	C10497	ko00330		45.1	37.3	32.6	79.5	27.2	18.6	54.6	75.4	82.9	19	16.1	35.9	42	39	29.2	82.1	75.4	100	32.6	45.3	10.3	39.3	26.6	34	72.5	82.2	69.7	15	13.9	24.2	11.1	12.4	9.4	62.4	45.9	59.9
iP7G	Nucleotide and its derivates	-	-		28	42.6	28.3	9	21.1	37.5	15.7	24.8	7.2	28.7	67.7	24	67.7	66.2	79.8	12.6	27.5	17.2	19	18.5	34.7	63.6	41.7	46.8	24.2	35.3	14.7	87.4	85.4	38.4	79.3	100	90.9	0	21.3	24.6
Indole	Indole derivatives	C00463	ko00380,ko00400,ko00402,ko01100,ko01110,ko04974		6.8	31.6	42.2	55.6	64.6	100	2	8.5	17.4	8.6	9.1	5.4	57.1	63.8	62.7	3.1	2.4	3.2	5.4	15.6	19.8	91	95.1	60.1	8.2	14.1	11.5	42.2	68.3	62.7	79.5	79.9	92.5	24.7	17.4	19.6
O-Feruloyl 2-hydroxylcoumarin	Coumarins	-	-		0.6	4.4	1.7	0	0	0	13	21	29.4	0	0	0	0	0	0	6.8	33.2	67.4	0	0	0	0	0	0	52.5	74.9	45.1	0	0	0	0	0	0	41.2	70.5	100
Phellodensin F	Others	-	-		7.6	7.5	4.3	0.8	0.4	0	55.2	55.5	72.1	0.7	1.1	1	0	0	1	61.7	100	56	0	0.9	0.4	0.9	0	0.9	54	37.8	57.7	0.4	0	0.1	1.5	1.7	0	29.1	23.5	35.3
L-Glutaminyl-L-valyl-L-valyl-L-cysteine	Amino acid derivatives	-	-		36.2	42.1	56.7	100	75.8	64.3	13.1	9.9	15.9	32	46.6	46.1	14.4	61.5	58.4	8.7	13.2	16	38.8	47.8	14.4	45.8	30.1	2.6	19	17.7	24.2	49.2	30.1	27.8	4.5	6.6	6.8	25.7	23.1	17.1
8-Methyl-2-oxo-4-phenyl-2H-chromen-7-yl 4-(hexyloxy)benzoate	Benzoic acid derivatives	-	-		9	5.5	4	0.9	0	0	17.1	18.6	27.5	1.9	3.1	3.6	0	0	0	75	58.3	46.9	4.2	3.2	2.5	0	0	0	50	42.7	81.4	3	2.7	2.8	0	0	0	100	63.7	67.2
N-Lauryldiethanolamine	Others	-	-		74.2	48.3	34.8	87.3	0	0	0	0	0	49.2	27.1	44.4	35.2	32.7	25.6	67.5	60.2	100	47.7	46.5	43.8	58.5	51.9	35	60	46.3	60.2	38.3	27.3	39	38.5	36	41.7	81	86.9	49.6
MAG (18:4) isomer3	Lipids_Glycerolipids	-	-		0	0	0	0	0	0	0	0	0	0	0	0	11.7	18.2	16.9	0	0	0	0	0	0	32.5	29.5	74.8	0	7.4	3.9	0	0	0	80.4	75.6	100	5.3	5.5	7.4
Octadecadien-6-ynoic acid	Lipids_Fatty acids	-	-		17.4	7.9	9.2	96.6	66.4	38.8	7.2	8.5	36.1	4.8	17.8	18.7	15.3	18.8	16	16.2	88.9	90.2	14.9	72.1	11.9	24.7	22.2	0	44.9	100	53.7	5	4.5	8.5	13.4	18	0	0	37.6	14.7
MAG (18:3) isomer3	Lipids_Glycerolipids	-	-		10.3	13.6	19.9	66.1	27.2	34.4	13.8	40.8	40.4	20	50.5	48.3	20.2	13.4	14.4	51	64.6	80	52.4	73.7	33.6	15.2	7.5	4	77.6	83.9	51.4	3	2	2.4	3.3	2.4	3.1	78.5	62.4	100
MGMG (18:2) isomer1	Lipids_Glycerolipids	-	-		10.2	13.5	36.9	48.8	15.8	18	0	16.4	16.5	35.1	79.5	93.6	15.3	12.6	13.1	17.2	38	30.5	100	97.5	29.6	11.6	11.4	21	23.8	21	9.4	6.8	7.1	9.3	11.6	7.4	11.9	21.8	17.2	20
Octadeca-11E,13E,15Z-trienoic acid	Lipids_Fatty acids	-	-		100	54.5	55.8	55.2	36.1	32.2	43.3	44.9	57.3	64.4	46.4	44.8	32.2	33.6	33.3	47.2	40.5	43.5	41.2	45.2	52.6	34.2	31.1	50.3	43.1	37.2	64.5	28.7	30.2	35.3	36.7	41.5	38.5	49.5	42.5	49
Phthalic anhydride	Others	-	-		100	52.9	59.5	58.1	36.9	30.6	40.2	47.1	57.7	61.7	49.3	48.5	34.9	33.7	33.4	50.2	43.5	42.8	39.1	49.3	60.8	34.6	31.4	53.7	44.1	38.7	69.2	30.2	31.1	37.5	38	42.8	43.6	52.4	44.9	50.7
MAG (18:3) isomer4	Lipids_Glycerolipids	-	-		9	5.7	5.6	24.4	12.4	8.4	5.6	8.1	38.9	4	9.5	10.8	3.4	5.6	4.6	12.1	33.7	24.3	9.9	13.3	34.2	4.4	3.7	0	61.5	100	28.5	27.4	25.9	18.2	2.9	2.3	3.2	21.4	71.5	24.3
O-Phosphocholine	Cholines	C00588	ko00564,ko01100,ko05231		57.2	88.4	57.7	24.7	42.2	40.2	6.8	7.8	0	60	80.5	68.8	47.9	78.1	60	0	6	0	47	32.7	7.8	74.9	73.5	100	5.4	4	5.3	0	0	5.7	43.1	43.1	43.7	6.7	4.6	7.3
10-Formyl-THF	Others	C00234	ko00670,ko00720,ko00970,ko01100,ko01120,ko01200,ko01523		89.4	70.8	61.1	79.6	18.3	18.4	34.1	30.3	35.3	75.4	84.9	69	10.7	12.4	10.5	30.6	28.4	17.9	81.7	100	52.3	11.6	10.2	6.3	27.9	17.2	42.1	40.2	50.2	72.5	7.5	7.7	8	25.9	19.5	21
Cocamidopropyl betaine	Others	-	-		55.9	100	65.8	71.2	57.7	69	70.1	66.4	72.6	63.1	51.5	50.6	81	62	91.5	91.6	78.6	85	58.1	68.4	44.7	67.5	65	68.1	82.5	77.3	76.9	44.3	45.3	46.5	70.9	67	81.2	74.5	71.4	78.6
LysoPC 19:0	Lipids_Glycerophospholipids	-	-		0	0	0	0	0	0	0	0	0	0	0	0	3.8	4.8	4.3	1.6	0	0	0	0	0	5	20.1	100	0	0	0	0	0	0	80.2	68	61.8	0	0	0
DGMG (18:1)	Lipids_Glycerolipids	-	-		15.4	20	17.5	5.6	3.5	4.6	43.7	48.5	63.6	0.9	7.3	7.9	1.2	1.2	0.8	6.9	80.1	100	5.5	6.7	4.8	1	0.4	0.3	74.4	76	39.6	3	3.1	2.5	0.2	0.3	0.2	67.7	67.9	80.6
LysoPC 15:1	Lipids_Glycerophospholipids	-	-		9.1	13.7	0.1	100	32.3	44.5	0.1	0.1	0.1	0.1	12.1	7.1	25.5	28.5	29.7	0.1	23.8	13	9.5	0.1	0.1	16.2	20.6	33.8	14.7	12	29.2	0.1	10	0.1	32.7	29.3	24.8	12.7	15.3	19.1
LysoPC 15:0	Lipids_Glycerophospholipids	-	-		9.5	17.8	7.6	100	24.3	26.6	1.3	0.9	1.1	14.6	27.3	28.8	23.9	25.5	19.9	2	11.1	7	16.3	22.6	42.9	16.1	14.5	17.6	5.4	4.1	15.2	23.3	41.8	41.8	13.7	11.5	15.2	8.6	16.2	11.5
MAG (18:3) isomer2	Lipids_Glycerolipids	-	-		9.2	14.3	12.7	7.2	3	3.2	36.7	70.5	65.1	1.8	5.7	6.9	1.6	1.6	1.2	11.6	55.3	70.5	6	8.2	5.4	1.3	1	0	67.3	78.7	44.7	2.5	2.2	1.7	0	0	0	84.5	61.5	100
MAG (18:1) isomer1	Lipids_Glycerolipids	-	-		10.9	28.8	41.9	64.4	25	29.7	11.5	15.3	26.3	2.5	8.7	7.3	26.1	20.6	18.8	9.6	44.9	57.3	5.2	4.5	3.2	14.9	16.9	7.3	45.3	100	15.7	8.4	7.5	5.4	14.7	15.6	19.5	47.6	42.7	62.5
MGMG (18:2) isomer2	Lipids_Glycerolipids	-	-		38	47.3	57.8	17.1	0	0	35.6	80.1	66.8	5.9	22.3	31	0	0	6.3	10.1	95.3	100	24.8	20.5	15.9	0	5.6	3.9	49.6	73	29.9	15.5	13.1	6.2	5.9	4.6	8.8	78.5	57.8	75.8
LysoPC 18:0 (2n isomer)	Lipids_Glycerophospholipids	-	-		1.5	3.3	2.8	100	24	30	0	0	0	0	1.6	1.1	18.1	22.3	19	0	3.3	2.3	0	1.5	4.3	14.5	18	9.1	1.5	1.1	2.7	0	1.7	2	5.8	2.4	4.6	0	1.8	2.2
LysoPC 17:0	Lipids_Glycerophospholipids	-	-		4.1	8.1	3.3	100	18.2	12	1.2	1.3	1.3	4.1	6.4	8.9	34.7	32.4	25.6	3.1	13.1	8.8	6	8.9	12.4	29.4	38.7	12.8	6.6	3.9	17.9	6.3	11.3	12.9	8.7	6.2	8.4	15.8	23.1	22
MAG (18:3) isomer1	Lipids_Glycerolipids	-	-		4.7	3.2	4.1	35.4	15.4	12.1	2.2	3.2	30.7	3.9	9	10.6	7.1	10.9	10.4	13.2	34.3	20.3	9	13.4	35.4	9.8	8.3	0.8	44.2	100	14.1	10.5	9.2	9.1	2.4	1.3	3.3	12.4	77.8	15.4
4-Hydroxy-3-methoxymandelate	Organic acids	C05584	ko00350,ko01100		10.1	10.3	9.7	100	24.5	15.8	4.9	7.1	7.6	6.4	11.8	9.4	26.8	25.7	22.4	11.3	11.3	0	11	20.1	13.9	31.1	23.2	30.1	4.6	0	0	9.6	13.1	24.7	19.9	10.3	13.8	12.2	6.4	5.6
2-Deoxyribose 1-phosphate	Carbohydrates	C00672	ko00030,ko00240		21	13.2	11.4	16.4	66	100	4.5	3.2	1.7	10.9	36.6	35.8	34.2	26.8	22.3	3.9	10.3	2.8	31.7	39.7	8.3	26.1	23.1	46.5	3.2	3.2	3.6	1.5	1.1	3.4	33.8	36.2	46.3	10.5	7.4	5.6
N-Acetylmethionine	Amino acid derivatives	C02712	-		0	0	0	100	79.7	75.1	0	0	10.8	28.3	47.3	46.3	33.8	17	15.4	9.8	14.3	18.3	34.5	48.2	16.1	12.4	19.6	33.3	12.5	13.4	21	0	0	0	74.4	65.1	53.9	14	28.8	16.1
Gallocatechin-catechin	Catechin derivatives	-	-		6.4	24.5	12.4	56.5	43.2	27.3	30.2	55.2	57.6	8.8	4.1	1.6	17.3	20.7	17.1	100	47.8	57.7	0.6	2	0.8	18.9	17.6	8.9	31.8	37.6	27	0.6	0.6	1.4	10.4	11.2	9.5	49.1	36.5	68
Acetyl tryptophan	Amino acid derivatives	C03137	-		0.7	0.7	1.1	0.6	1.3	1	0.9	1.2	3.7	0.8	0.5	0.6	1.5	0.4	0.4	1.5	0.8	0.8	0.8	0.5	0.5	0.7	0.9	35.5	1.5	2	2.2	0.8	0.5	1.5	81.9	82.3	100	2.8	2.4	1.6
3,4-Dimethoxycinnamic acid	Hydroxycinnamoyl derivatives	-	-		1.8	3.1	1.9	0.4	0	0	8.6	13.4	20.9	0.8	1.8	2.2	0	0	0	14	29	43.8	2.1	1.8	3.5	0	0	0	48.9	67.5	100	0.9	0	1.4	0	0	0	60.7	71.4	83.4
Lauric acid (C12:0)	Lipids_Fatty acids	C02679	ko00061,ko00333,ko01100,ko01130		86.7	97.9	91.8	60.5	52.5	45.8	72.7	81.6	77.6	61.1	57.8	68.3	47	47.5	49.8	75	71.5	64.8	68.4	77.9	57.2	60.7	50.7	41.3	77.6	76.2	93.4	42.9	49.2	52.7	100	96.1	98.7	78.5	83.4	57.8
Myristoleic acid (C14:1)	Lipids_Fatty acids	C08322	-		19.9	24.4	0.1	27.2	0.1	0.1	24.1	43.8	18.3	14.6	12.9	18.5	0.1	0.1	0.1	17.6	19.2	13.5	36.8	17.5	0.1	0.1	0.1	16.9	14.7	19.9	23.5	0.1	0.1	0.1	0.1	0.1	100	20.3	17.5	17.6
Thiamine	Vitamins	C00378	ko00730,ko01100,ko02010,ko04122,ko04977		24.7	18.1	23.5	0	0	0	13.4	10.6	17	51.4	36.3	39.7	22.1	34.1	23.4	22.8	22.2	0	38.2	21.9	0	53.4	50.2	32.4	12.9	11.1	12.8	16.9	10.5	0	100	63.3	56.6	10.8	13.3	10.6
D(+)-Melezitose O-rhamnoside	Carbohydrates	-	-		3.5	11.1	11.3	28.5	66.5	55.2	0.4	0.3	0.6	36.8	21.4	33.2	100	56.6	94.8	0.7	1	0.6	7.9	8.3	2.7	24.9	23	10.1	0.3	0.3	0.6	0.4	0.4	0.2	3.2	3.6	3.9	0.4	0.5	0.3
Anthranilate O-hexosyl-O-hexoside	Benzoic acid derivatives	-	-		9.1	15.6	17	54.7	56.9	80.4	1.7	2.2	2	25.1	17.1	13.6	36.1	73.2	63.4	0.6	0.8	0.3	13.8	23.9	3.7	51.8	83	62.3	0.6	0.9	1.3	2.1	2.2	3.5	75	58	100	0.5	0.7	0.5
Argininosuccinate	Organic acids	C03406	ko00220,ko00250,ko01100,ko01110,ko01130,ko01230		45.2	45.8	22.8	55.9	55.2	52.2	23.7	25.8	26.6	39.8	100	47.2	27.4	32.9	26.7	34.8	48.2	20	57.5	80.3	57.5	30.7	23.6	22.6	18.1	17.6	35.8	15.2	13	17.9	10.3	15.7	13.8	26.5	26.9	24.7
Cyclic AMP	Nucleotide and its derivates	C00575	ko00230,ko01522,ko02025,ko02026,ko04010,ko04014,ko04015,ko04020,ko04022,ko04024,ko04062,ko04072,ko04111,ko04113,ko04114,ko04211,ko04213,ko04261,ko04270,ko04340,ko04371,ko04540,ko04611,ko04670,ko04710,ko04713,ko04720,ko04723,ko04724,ko04725,ko04726,ko04727,ko04728,ko04740,ko04742,ko04750,ko04910,ko04911,ko04912,ko04913,ko04914,ko04915,ko04916,ko04918,ko04919,ko04921,ko04922,ko04923,ko04924,ko04925…		11.7	13.7	6.1	100	68.9	62.5	11.9	10.9	9.1	13.1	54.2	31.3	38.3	45.1	40.2	21.8	42	26.6	32.9	49.6	19	32.8	45.5	27.9	18.3	23.4	19.5	4.5	2.8	3.4	38.6	37.3	47	9.1	17.8	18
9,10-EODE	Lipids_Fatty acids	-	-		1.7	1.4	1.4	40.1	27.2	8.1	0.7	0.9	1.4	1.1	1.3	1.5	7.2	9.9	6.6	1.5	2.2	1.9	1.1	3.3	1.6	12.9	21	40.8	1.7	2.1	2.2	0.5	1.2	0.8	87.8	90.2	100	0.9	2.3	0.9
9-HOTrE	Lipids_Fatty acids	-	-		0	0	0	2.8	0	0	0	0	1.2	0.5	0.8	0	5.9	6.4	5.7	2.8	4.9	4.9	0	0	0	12.2	19	31	2.6	2.8	1.2	0	0	0	94.6	97.4	100	0	1.2	0
9-KODE	Lipids_Fatty acids	-	ko00591		6.6	8.8	5.4	64.3	38	26.1	0	0	0	0	0	0	14.3	22.5	16.3	0	6.8	5.3	0	0	24.1	26.8	36.9	36	6.7	10.7	13	10.7	12.3	17.7	93.1	50.4	100	5.3	23.7	4.9
13-HpOTrE(r)	Lipids_Fatty acids	-	-		0	0	0	0	0	0	0	0	0	0	0	0	41.3	42.8	26.8	0	0	0	0	0	0	100	79.6	87.5	0	0	0	0	0	0	32.3	34	42.4	0	3.3	0
9-HpOTrE	Lipids_Fatty acids	-	-		34.5	9.5	10.5	8	46.7	100	12	13.9	13.9	10.6	42.7	11.1	50.3	36.2	32.7	11.9	17.4	79.4	10.5	10.5	9.8	71	39.4	14.8	13.2	41.4	11.9	35.8	34	34	9.1	9.1	7.4	10.6	53.6	14.3
13-HOTrE(r)	Lipids_Fatty acids	-	-		57.4	27.4	27.7	34.5	81	78.5	30.7	28.8	31.5	24.1	44.9	24.3	37.5	40.4	39.9	29.5	26.6	87.7	25.2	29	22.3	100	82.2	27.6	24.7	30.4	27.1	45.7	41.5	35.6	27.2	28.7	28.2	23.4	66.3	26.7
4-Methoxycinnamic acid	Hydroxycinnamoyl derivatives	-	-		1.8	2.9	2.3	1.1	1.3	1.4	0.4	0.3	0.8	4.2	0.7	0.9	1	0.3	0.4	2.1	2.5	2.3	0.7	1.4	80.3	0.3	0.3	0.6	2.3	1.2	1.8	100	54.1	74.7	0.4	0.6	0.5	1.2	3.7	0.7
12,13-EODE	Lipids_Fatty acids	-	-		8.8	12.8	7.2	100	55.2	25.8	4.2	4	4.9	0	0	0	19.1	44	21.8	2.9	3.6	3.7	0	2.3	16.5	28.9	30	31.7	4.2	5	3.8	7.4	8.2	11.2	50.7	38.3	58.6	4.1	9.5	4.2
13-HPODE	Lipids_Fatty acids	C04717	ko00591,ko01100		14.7	11.1	8.8	33.3	32.9	17.1	8.4	6.4	10.5	0.1	15.5	18	37.2	44.9	30.4	7.3	14.7	11.5	14.8	44.9	12.3	58.9	53.6	100	0.1	14.9	17.7	11	0.1	0.1	83.9	81.5	73.8	10.1	11.3	5.7
O-Caffeoyl maltotriose	Hydroxycinnamoyl derivatives	-	-		11.1	7.7	14.8	13.1	11.5	21.1	15.2	20.8	32.3	30.1	13.8	13.5	10.2	21.5	19.4	47.9	30	34.8	12	13.2	42.5	12.6	12.5	10	41.9	27.7	47.3	51.4	70.6	100	63.9	60.7	45.4	28.9	50.5	41.9
Citramalate	Organic acids	C00815	-		26.4	14.2	14	33.7	23.9	32.7	28.7	22.6	20.1	12.8	23.9	17.7	15.8	14.1	9	50.1	46.8	73.4	25.7	32.4	21.1	14.4	13.7	7.8	48	25.9	100	14.1	17.4	20.1	9.8	6.8	8.3	94.9	86.7	56.3
Protocatechuic acid O-glucoside	Catechin derivatives	-	-		9.3	25.6	25.3	74.6	94.8	100	1.7	3.6	3.3	13	4.3	3.4	43.1	55.7	48.7	14.8	2.3	1.8	2.7	1.1	50.4	49	34.7	25.9	6.3	6.6	22.9	4.1	2.8	3.6	7.6	7.4	8.7	6.9	12.8	10.5
Syringaldehyde	Hydroxycinnamoyl derivatives	-	-		0	0	0	0	0	0	19	21.9	40	0	0	0	0	0	0	59.9	74.8	82.4	7.3	0	0	0	0	7.9	87.2	85.8	60.6	0	0	0	13.1	18.8	16.6	53.1	100	78.9
L-Glutamine O-hexside	Amino acid derivatives	-	-		15.4	9.1	8.1	88.7	100	62	1	1.1	1.2	19.4	30	26.8	13.4	14.9	15.1	0.7	1.3	0.7	14.9	27	95.4	20.3	16.1	29.3	0.8	1.7	2.4	11.9	15.9	11.9	13.7	16.8	16.7	0.9	3.3	2.1
L-Glutamic acid O-glucoside	Amino acid derivatives	-	-		22.6	22.4	21.3	18.6	38.7	34.6	6.7	3.7	2.4	52.5	54.5	44	30.2	61.3	54.8	3.7	5.1	3.1	36.7	39.3	57.8	58.7	56.3	54.8	3.1	0	2.8	18.2	16.5	14.4	90.6	100	94.4	2.8	0	0
Maltotetraose	Carbohydrates	C02052	-		1.1	2.6	2.4	1.8	5.4	2.8	0	0	0.8	5.8	2.8	2.1	5.8	4.1	7.4	0	0.8	1.4	2	3	3.5	2.5	4.4	40.7	0	0	0	4.9	3.6	3.9	48.1	30.2	100	0	0	0
Kynurenic acid O-hexside	Organic acids	-	-		0	10	8.4	15.4	10.4	0	20.6	25.2	100	0	0	0	9.9	0	0	64.2	31.2	39.4	0	0	0	12.3	12.6	0	71.9	56.4	44	0	0	0	0	0	0	24.3	39.8	32.5
2,5-dihydroxy benzoic acid O-hexside	Benzoic acid derivatives	-	-		36.9	29.9	31.8	26.4	35.6	31.9	66.8	62.9	73.2	16.1	17.9	17.9	38.7	38.3	37.8	82.2	100	87.6	21.2	17.9	9.1	30.9	25.9	22.2	73.6	69	50.1	19.3	14.8	18.5	25.5	22.7	27.2	86	71.7	81.2
Uridine 5'-diphospho-D-glucose	Nucleotide and its derivates	C00029	ko00040,ko00052,ko00053,ko00240,ko00500,ko00520,ko00524,ko00561,ko00908,ko01051,ko01060,ko01100,ko01130		78.2	77.1	71.8	41.1	0	0	45.4	28.5	22.8	68.8	56.6	44.3	60	99.4	100	7.9	10.2	6.1	39.2	39.2	82.9	96.5	64.1	44.3	8.7	8.3	17.8	67.6	57.3	45.1	52.5	45.9	31	19.1	25.8	19.1
Gallic acid O-Hexoside	Benzoic acid derivatives	-	-		71.7	40.1	64.5	30.6	12.3	40.1	100	51.3	55.3	5	13.2	20.4	11.4	7	6.1	29.1	46.8	25.8	19.8	17.3	5.7	13.3	4.6	2.2	29.7	22.5	41.4	12.7	6.3	12.7	3.6	2.5	3.1	30.3	19.7	27.2
Caftaric acid	Hydroxycinnamoyl derivatives	-	-		14.5	13.4	0	3.9	0	0	48.8	39.7	47	11.5	10.8	11.1	0	0	0	57	72.1	77.3	15	13.9	54.8	0	0	0	92.4	100	67	13.8	10.8	9.7	0	0	0	72.4	76.7	74.2
4-O-Caffeoyl quinic acid (criptochlorogenic acid)	Quinate and its derivatives	-	-		19.8	25.8	18.2	57	40.9	8.5	45.7	100	66.7	0	2.4	1.9	0	27.9	18.9	35.1	18.2	26.2	0	1.2	0	17.8	31	0	13.4	14.8	2.9	0	0	0	1.9	3.3	2.3	21.9	8.6	7.6
1-O-beta-D-Glucopyranosyl sinapate	Hydroxycinnamoyl derivatives	-	-		10.5	42.5	34.2	88.4	86.2	60.6	1.1	0.1	0	10.9	18.8	6.6	54.5	100	61.4	0	0.1	0.1	4.9	3.9	41.4	45.1	40.5	20.9	0.1	3.5	0.4	37.3	22.3	23.5	11.6	10.1	20	0.2	0.1	0.4
Catechin-catechin-catechin	Catechin derivatives	-	-		0.1	4.8	1	47.8	58	100	0	0	0	2.4	2.1	0.6	28.8	34.9	28.2	0	0	0	0	0.1	0	20.5	11.7	1.1	0	0	0	0.2	0	0	1.1	1.1	1	0	0	0
Luteolin O-hexosyl-O-hexosyl-O-hexoside	Flavone	-	-		6.3	33.7	17	83.6	98.9	44.2	31.5	44.2	27.5	1.8	4.1	0.8	16.2	44.9	47.9	32.8	43.7	32.7	0.4	0	0.7	28.2	31.4	25.2	25.8	19.6	9.6	0.8	0	1.7	1.4	0.9	1.5	83.1	19.7	100
Hesperetin O-hexosyl-O-hexoside	Flavanone	-	-		41.7	35.8	42.3	17.7	35.8	19.2	35.9	42.2	39.8	12.8	44.2	49.3	8.3	27	29.1	13.1	37.1	43.3	31.2	42.2	31.2	18.4	24	21.2	34.1	34.3	29.7	24.9	97.9	100	15.9	61.2	58.6	23.9	93.1	89.7
Hesperetin O-Glucuronic acid	Flavanone	-	-		7.5	16.1	27.2	100	93.7	51.9	0	0	0	0	0	0	28.2	19.6	28.4	0	0	0	0	0	0	36.2	28.4	9.6	0	0	0	0	0	0	13.4	21.7	12.4	0	0	0
Chrysoeriol 8-C-pentosyl-O-rutinoside	Flavone C-glycosides	-	-		0	0	0	19	59.5	100	0	0	0	16.6	0	0	30.1	31.3	35.6	0	0	0	0	0	0	31.3	19.3	0	0	0	0	0	0	0	0	0	0	0	0	0
Hesperetin O-malonylhexoside	Flavanone	-	-		29.3	5.3	4.5	6.7	3.5	3.8	28.2	32.6	100	1.9	0	9.5	5.5	3.2	2.7	42.1	53.4	40.8	3.6	0	11	4.1	5.9	4.9	38.6	18	84.5	25.2	29	15.8	8.6	7.8	6.9	25.7	15.7	19.8
Apigenin C-hexosyl-O-rutinoside	Flavone C-glycosides	-	-		0.1	63	0.1	0.1	0.1	0.1	0.1	74.6	49.6	0.1	0.1	0.1	0.1	0.1	0.1	43.5	52	100	0.1	0.1	0.1	0.1	0.1	0.1	50.2	72.6	65.7	0.1	0.1	0.1	0.1	0.1	0.1	73.4	72.8	60.3
Apigenin O-hexosyl-O-rutinoside	Flavone	-	-		0	3.7	0	23.7	48.3	100	0	0	0	0	2.5	0	38.5	47.9	21.5	0	0	0	0	0	0	31.2	8	0	0	0	0	0	0	0	0	0	0	0	0	0
Chrysoeriol O-acetylhexoside	Flavone	-	-		13.8	38	23.3	61.2	30.9	33.5	22	33.3	23.1	5.8	8	2.3	18	33.4	34.1	100	28.6	33.5	0	0	0	31.5	19.7	5.1	21.3	33.8	68.7	1.1	0	1.1	5.2	5	4.9	39.8	26.7	78.8
Chrysoeriol 7-O-rutinoside	Flavone	-	-		8.2	16	7.5	16.4	11.1	4.9	4	11.2	28.1	4.5	7.7	3.3	39.2	50.2	53.9	49.8	58.8	74.7	0	5.6	0	57.6	62	45.7	55.1	66.5	59.2	0	0	3.4	44.9	37.8	38.9	98.4	90.2	100
Apigenin 7-O-glucoside (Cosmosiin)	Flavone	C04608	ko00944		0	0	0	0	18.1	8.8	15.6	18.1	19	0	0	0	0	0	0	33.1	61.5	56.6	0	0	0	0	0	0	79.6	100	34.6	0	0	0	0	0	0	47.6	63.6	97.9
Chrysoeriol 7-O-hexoside	Flavone	-	-		8.8	16.2	5.4	2.6	2	1.2	66.4	44	40.4	0.8	5.7	0.7	1.4	1.2	1	100	71	64.2	0.2	0.3	0	1.6	0.9	0	54.7	54	7.2	0	0	1.1	0.7	0.8	0.7	45	32.6	44.3
Isorhamnetin O-acetyl-hexoside	Flavonol	-	-		5.3	13.6	3.6	1.1	0.8	0.7	48.1	41.8	29.2	0.9	2.1	0.5	0.4	0.6	0.5	100	44.5	35.5	0.3	0.4	0.4	1	0.5	0.8	31.4	48.4	40.1	0.5	0.3	1.1	0.2	0.2	0.5	60.1	31.4	77.2
Luteolin O-eudesmic acid-O-hexoside	Flavone	-	-		10.6	27.8	7.9	0	0	0	100	57.4	65.3	0	0	0	0	0	0	22.1	72.4	67.8	0	0	0	0	0	0	63.6	44.1	35.7	0	0	0	0	0	0	95.8	24.6	87.5
Eriodictyol C-hexoside	Flavone C-glycosides	-	-		12.6	26.8	21.7	84.6	73.2	59.7	3	4.2	3.7	13	6.3	3	100	94.5	81.3	4.8	3.4	3.1	2.1	2.3	1.4	82.3	75.3	14.9	3.2	3.9	1.5	5.4	3.1	3.8	19.5	15.1	16.6	3.7	5.2	3.8
Quercetin O-acetylhexoside	Flavonol	-	-		5.8	23.8	10.6	100	46.4	70.3	24.3	31.3	18.8	2.7	3.3	0.8	11.7	20.2	23.3	54.3	17.4	16.7	0.2	0.3	0.2	18.6	12.5	2	9.6	15.6	28.7	0.4	0.1	0.4	1.7	1.2	1.5	21.6	7.8	36.7
Tricin O-sinapic acid	Flavone	-	-		100	54.7	74.8	15.1	17.1	4.7	34.6	27.6	41.9	15.4	25.9	29.2	22.9	0	0	0	21.4	19.8	17.4	12.2	12.1	0	0	0	24.1	0	31.1	11.8	10.5	0	0	0	0	0	12.9	0
Tricin O-saccharic acid	Flavone	-	-		44.3	14	17.5	4.9	8	6.6	54.9	58.5	100	2.7	1.7	7.7	8.2	4.4	4.3	29.9	67.6	51	2.8	1.5	6.5	4.3	4.5	15.5	42.3	30.1	46.2	0.5	0.4	0.8	6.1	6.7	6.2	25.9	10.8	15.1
Tricin 5-O-hexoside	Flavone	-	-		12.5	12.7	13.7	0	35.2	27.4	51.1	57	79.9	12.6	19.2	27.3	0	0	0	47	77.9	91	23.5	12.1	10.3	0	0	0	86.9	100	82.8	13.4	11.9	23.3	0	0	0	43	67.3	70.8
Tricin O-glucuronic acid	Flavone	-	-		18.4	26.6	0	0	0	0	72	89.3	100	0	0	0	0	0	0	27.7	72.4	71.6	0	0	0	0	0	0	47.9	65.9	70.9	0	0	0	0	0	0	32	35.9	37.9
Tricin 7-O-hexoside	Flavone	-	-		0	10.6	5.5	0	0	0	15.9	14.3	23.5	0	1.8	0	0	2.4	0	7.2	22.2	19.6	0	0	1.2	1.8	0	0	30.4	21.3	100	0	0	2.1	0	0	3.2	23.6	50.5	56.5
O-p-coumaroyl-O-salicyloyl quinic acid	Quinate and its derivatives	-	-		0	0	0	0	18	9.7	0	0	0	0	0	0	0	47.2	31.7	0	17.2	0	0	0	0	69.2	48.3	12.7	21.1	37	11.6	0	0	8.5	55.6	100	82	0	18.2	19.7
p-Coumaroyl quinic acid O-glucuronic acid	Quinate and its derivatives	-	-		9.5	7.9	10.9	0	0	3.1	100	60.5	58.1	0	10	7.6	3.3	3.3	5.3	64	74.4	49.9	9.9	8.3	0	4.2	5.1	3.7	57.3	39.7	12.5	2.8	0	0	0	3.4	4	19.8	13.6	16.4
Quinic acid O-glucuronic acid	Quinate and its derivatives	-	-		5.4	14.1	24.1	15.4	0	0	24.7	38.8	100	2.9	0	4.5	0	0	0	72.5	74.8	70.5	9.8	8.6	0	1.9	0	2.5	33.4	48.8	13.3	1.7	2.7	8.7	0	0	0	0	17.5	0
Eudesmoyl quinic acid	Quinate and its derivatives	-	-		3.9	4.9	2.8	0	0	0	15	23.5	22.8	3.7	0	0	0	0	0	36.5	44.8	53	0	4.1	0	0	0	0	39.5	49.2	67.1	0	2.6	0	0	0	0	58.3	47	100
5-O-p-coumaroyl shikimic acid O-hexoside	Quinate and its derivatives	-	-		28.7	35.6	35.4	100	66.2	62.1	37	34.1	22.8	17	14.9	0	46	75.8	62.3	23.4	24.5	27.3	19	13.3	13.2	63.3	50.7	34.4	0	23.4	5.6	13.4	13.9	9	22.8	26	28.9	14.9	0	26
1-O-p-Coumaroyl quinic acid	Quinate and its derivatives	-	-		25.1	13.1	0	0	0	0	82.9	100	77.4	0	0	0	0	0	0	95.3	92.2	78.4	0	0	0	0	0	0	41.3	35	8	0	0	3.6	0	0	0	21.6	32.6	9.1
3-O-p-coumaroyl shikimic acid O-hexoside	Quinate and its derivatives	-	-		6.5	26.7	22.7	100	80	66	35.4	34.8	19.6	6	0	0	62.4	53.6	56.8	57.6	37.3	41.2	0	0	0	56.8	35.2	0	34.9	53.6	66.4	0	0	0	8.5	8.6	8.4	64	4	60.8
3-O-p-Coumaroyl quinic acid	Quinate and its derivatives	-	-		2.1	6.2	2.3	0	0.1	0	14.2	18.8	23.5	1	2.5	0.7	0	0	0	48.4	97.3	100	0.3	0.3	6	1.1	0.4	0.8	58.2	31.9	46.3	6.2	2.5	23.5	0.4	0.2	0.3	11.6	10.6	14.1
Glucarate O-Phosphoric acid	Carbohydrates	-	-		31.6	47.5	49	8.4	20	12.7	45.2	45	36.3	78.3	62.3	59.1	98.1	51	100	33.7	33.9	30.5	54.8	49	52.2	86.1	60.1	95.1	41.1	37.5	30.9	85.1	51.2	36	92.8	82.9	54.8	58.6	51.2	59.5
Trehalose 6-phosphate	Carbohydrates	C00689	ko00500,ko01100,ko02060,ko04723		22.5	19.4	14.3	26.6	26.1	25.4	15.6	10.2	5.9	19.1	27.1	15.8	19.6	47.6	45.4	6.9	9.7	7.6	22.6	12.4	54.9	36.8	42	37.1	6.9	7.3	6.3	37.1	16.1	19.9	77.1	100	76.8	5.9	9.3	7.4
6,7-dihydroxycoumarin 7-O-quinic acid	Coumarins	-	-		36.1	39.1	19.1	6	6.3	4.4	73.9	69.6	31.8	12.4	14.4	8.8	23.3	16.6	15.2	85.3	61.3	49.1	10.3	17.5	4.1	15.5	15.4	7.9	48.2	50.1	51.8	5.7	4.5	11	4	4.8	5.9	100	30.4	84.9
Esculetin O-quinacyl esculetin O-quinic acid	Coumarins	-	-		19.1	24.2	7.2	0.8	0.5	0.3	41.1	41.1	11.6	2.7	4.5	2	11.1	7.4	4.9	23.6	54.9	25	1.8	3.9	0.3	4.9	3.9	1.1	43.4	33.9	36.5	0.2	0.2	1.2	0.5	0.6	1	100	11	100
Diethyl phosphate	Organic acids	C06608	ko00627		66.2	52.1	56.6	47.7	13.1	11.5	100	89.8	65.1	53.8	47.1	63.8	43	34.3	40.3	65.9	63.8	22.8	50.8	61.8	51.2	13.5	14.9	75.1	72.5	36	53.8	29.9	38	30.6	56.8	53.8	58.1	49.7	14.4	58.1
2-Isopropylmalate	Organic acids	C02504	ko00290,ko00620,ko01100,ko01110,ko01210,ko01230		15	15	34	66.8	57.3	100	19.7	17.6	14.5	11.4	16.2	14.6	29.2	32.9	57	30	30.8	30	14.1	22.7	64.7	51.2	80.9	83.3	28.4	15.5	76.9	47.2	27.6	45.1	50.9	53.8	38.7	22.1	26.8	16.4
Syringic acid O-glucoside	Benzoic acid derivatives	-	-		17.4	12	11.5	8.7	10.8	11.8	20.3	21.6	29.6	23.1	13.1	11.8	28.8	19.2	18	42.6	66.5	54.7	13.9	11.9	18.3	20.9	19.1	44.2	71.6	42.3	100	14.1	10.3	12.9	44.8	39.2	44.2	41.7	48.1	47
Epicatechin-epiafzelechin	Catechin derivatives	-	-		1.3	9.3	5.5	39.6	48.2	100	0	0	0	4.7	3.5	0	35.9	34.3	26.6	0	0	0	0	0	0	22.2	16.5	6.7	0	0	0	0	0	0	2.3	2.4	2.4	0	0	0
LysoPE 16:0	Lipids_Glycerophospholipids	-	-		3.9	5	2	100	42.5	13.4	1	1.1	0.7	2.4	3.6	8.5	14.4	17.6	11.8	2.2	10	4.8	5.4	6.7	11.8	15.2	13.1	0.3	3	1.3	14	4.5	7.6	9.1	0.2	0.1	0.1	3.1	5.5	4.6
LysoPE 18:1	Lipids_Glycerophospholipids	-	-		0.8	1.2	0.5	100	19.7	15.1	0.5	0.5	0.3	0.5	1	1.1	17.5	26.3	18.8	1.8	4	2	0.8	1.6	2.5	14.3	15.5	0.5	0.9	0.7	4.3	1.1	2	2.5	0.2	0.1	0.1	1.1	1.6	1.3
LysoPE 18:1 (2n isomer)	Lipids_Glycerophospholipids	-	-		0.3	0.7	0.3	100	22.3	17.6	0.1	0.2	0.1	0.1	0.2	0.1	9.6	10.5	8.3	0.1	0.2	0.1	0.1	0.1	0.2	6.7	7.5	0.3	0.1	0	0.1	0.2	0.5	0.4	0.1	0.1	0.1	0.1	0.1	0.1
Salicylic acid O-glucoside	Phytohormones	-	-		41.2	40.3	46.6	26.8	54.2	54.6	100	66.4	59.9	33.8	53.1	57.9	48.5	68.8	67	77.3	71.6	53.8	64.2	57.1	14.7	62.1	59.9	53.4	57.4	46.6	11.3	48	38.5	39	65.5	67.4	74.5	35.8	31.6	33.8
Quinacyl syringic acid	Quinate and its derivatives	-	-		29.7	23.7	25	0	11.5	0	74.7	70.9	84.3	15.4	12	15.5	0	0	0	80.7	94.8	89.2	11.7	20.5	13.9	0	0	0	78.7	65.6	100	0	0	13.3	0	0	0	48.9	54.6	55.6
Di-O-methylquercetin	Flavonol	-	-		1.4	1.9	0.7	34.8	30.3	6.2	0.8	0.9	0.7	2.1	3.9	3.4	1.7	4	1.4	1	1.2	1.3	1.9	14	1	2.5	6.3	35.5	0.8	1.1	1.5	1	0.9	1.2	96.7	100	87.4	1.4	1.2	1.4
Guanosine 5'-monophosphate	Nucleotide and its derivates	C00144	ko00230,ko01060,ko01065,ko01100,ko01523,ko04022,ko04740,ko04742,ko04744		2.3	2.2	1.1	100	24.4	32.1	0	0	0	1.7	5.2	5.3	12	14.4	9.3	0	0.5	0	4.8	6.8	2.9	8.4	8.1	12.1	0	1.1	0.9	0	1.3	2.2	4.4	5.8	6.7	2.4	2.2	1.3
4-Hydroxy-7-methoxycoumarin-beta-rhamnoside	Coumarins	-	-		1.5	0	0	0	0	2.3	6.5	8.8	9.1	0	0	0	0	2.7	3.2	17.2	7.1	7.3	0	0	3.8	3.5	4.1	4.5	9.7	8.4	100	0	0	0	0	0	0	5.4	5.3	6.6
α-Linolenic acid	Lipids_Fatty acids	C06427	ko00592,ko01040,ko01060,ko01070,ko01100,ko01110		11.6	15.8	10.9	100	40	22.9	11.2	12.8	17.1	6.4	8.2	6.9	10.6	9.4	10.6	12.5	22.9	16.5	6.4	9	20	10.1	11.7	0	22.2	37.1	15.2	8.5	9	9.9	0	0	0	11.2	27.1	9.9
2'-Deoxyinosine-5'-monophosphate	Nucleotide and its derivates	C06196	ko00230		10.6	12.6	18.5	4	12.5	7.8	5.2	4.8	5.5	26.5	23.2	12.9	63.1	56.2	53.2	10.8	7.2	2.7	27.3	18.6	6.2	71.5	80.1	100	3.6	6.7	2.2	9.9	6.8	6.5	54.5	67.4	91.4	5.9	4.8	6.5
6-Methylmercaptopurine	Nucleotide and its derivates	C16614	ko00983		20.3	23	32	56.9	39.5	35.7	4	6.7	8.7	8	9.4	8.6	7.5	13.9	12	2.4	3.1	2.8	14.3	25.6	35.9	11	8.9	9.9	6.4	19.5	10.5	72.4	94.8	100	23	16.7	15.6	16.8	13	11.6
Adenosine O-ribose	Nucleotide and its derivates	-	-		52.3	77.3	54.1	56.4	39.1	40.9	53.8	56.9	64.1	43	45.2	50.1	55.2	50.7	50.8	100	90.6	60.8	36.9	52.2	33.5	45.4	49.2	64.6	61.3	72.4	65.7	47.3	58	53.6	39	41.8	33.1	53.4	82.3	81.2
Succinyladenosine	Nucleotide and its derivates	-	-		1.1	1	1.6	100	35.9	37.9	1.3	1.6	1.4	1	1.1	0.8	15.2	7.2	11.1	2.4	3.7	3.3	1.1	1.1	1.6	17.3	16.4	14.4	3.3	4.1	1.7	3.5	3.8	4.2	16.6	11.1	8.6	2.1	2.4	3
4-Aminoindole	Indole derivatives	-	-		13.2	33.4	29.8	100	67.9	63.7	13.1	18.6	19.8	7.4	8.8	9.4	29.7	79.1	55.5	53	21.3	36.9	0	7.9	4.6	59.5	29.9	26.6	57.2	51.6	52.4	4.1	5.4	4.9	0	17.3	28.3	43.7	46.8	62.4
LysoPC 20:4	Lipids_Glycerophospholipids	-	-		1.3	3	2.1	100	20.3	19.5	0.4	0.4	0.4	0.7	1.4	0.9	14.1	20.3	16.1	1.8	3.3	2.2	0.9	1.3	3.6	14	16.7	6.2	1.5	1.4	2.8	0.9	1.3	1.7	6.4	3.5	4.3	1.2	2.1	1.9
Spermine	Phenolamides	C00750	ko00330,ko00410,ko00480,ko01100,ko04976		97.4	99.1	100	72.6	72.2	72.8	67.4	78.1	75.8	98.3	90.4	96.5	85.4	79.7	80.2	56.1	59.1	51.5	96.5	82.1	82.3	80.8	71.2	76.9	53.7	60.5	34.3	80.3	84.7	82.9	71.6	69.8	65.3	51.2	40.9	46.6
LysoPC 14:0 (2n isomer)	Lipids_Glycerophospholipids	-	-		2.5	6.3	4.8	100	33.6	29	0.3	0.1	0.2	1.7	4.4	3	25	20.8	15.7	0.6	2	1.4	2.1	2.7	15.6	12.4	18.1	25	0.7	0.6	1.6	6.1	8.2	10	38.8	25.5	17.8	1.1	1.6	1.4
LysoPC 16:0 (2n isomer)	Lipids_Glycerophospholipids	-	-		14.2	27.5	15.7	100	70	61.4	2.7	2.2	1.7	15.2	29.8	30.8	60	60.6	49.1	4.1	19.7	11.3	25.7	32.2	61.4	46	48	47.6	8.6	6.3	27.3	23.6	34.1	38.6	38.6	29.8	35.7	11.4	23.8	17.3
LysoPC 18:0	Lipids_Glycerophospholipids	-	-		0.9	1.5	1	100	16.3	8.9	0.3	0.3	0.3	0.7	0.9	1.4	8	7.3	5.3	0.5	2.1	1	1.4	1.1	2.2	6.5	9.3	6.3	1	0.4	2.7	1.1	1.6	2.1	5	3.4	4.1	1.9	2.9	2.6
LysoPC 20:1 (2n isomer)	Lipids_Glycerophospholipids	-	-		0.4	0.9	0.5	100	20.9	18.1	0	0	0	0	0	0	12.8	8.2	6	0	0	0	0	0	0.8	5.9	8.6	3.3	0	0	0	0.8	1.3	1.3	2.5	1.8	2.6	0	0	0
LysoPC 20:1	Lipids_Glycerophospholipids	-	-		0.8	2.2	1.2	100	16.7	13	0.4	0.3	0.3	0.3	0.5	0.4	11.3	12	9.8	0.8	1.8	1.4	0.3	0.4	1.6	8.3	9.9	1	0.7	0.5	2.9	0.4	0.6	0.8	0.4	0.3	0.4	0.8	1.2	1.6
LysoPE 14:0 (2n isomer)	Lipids_Glycerophospholipids	-	-		2.3	2.5	1.6	100	25.6	18.2	0.3	0.3	0.2	1.4	3.1	3.8	18.9	23	19.5	0.7	3.1	2	2.2	2.7	9.2	13.6	18.6	1.7	0.7	0.6	1.9	8	12.6	15.4	2.1	0.7	1.4	0.9	1.4	1.6
LysoPE 16:0 (2n isomer)	Lipids_Glycerophospholipids	-	-		0.9	1.2	0.9	100	20.2	8.6	0.2	0.2	0.2	1.1	2	3.7	9.3	11.9	8.8	0.6	2.6	1	2.8	3.2	5.3	11.2	9.8	0.5	0.8	0.5	3.8	1.4	2.2	3.2	0.3	0.2	0.3	1	1.6	1.3
Hesperetin 7-O-neohesperidoside (Neohesperidin)	Flavanone	C09806	ko00941		7	20.7	5.9	5.8	4.4	2.9	27.2	57.2	63.6	1.2	4.3	0.9	6.9	7.1	7.8	77	90.9	100	0.3	0.3	0.3	7.7	8	5.7	75.9	79.1	57.2	0.1	0.1	1	4.5	3.5	4.1	88.8	44.9	96.3
L-Homocitrulline	Amino acids	C02427	-		27.8	33.2	46.7	100	68.4	48.9	23.6	33.1	21.6	41.4	29.2	34.5	48.7	42.8	33.2	15.6	15.5	26.5	32.9	37.8	39.5	30.2	31.1	33.6	27.9	27.9	18.5	69.5	94.7	84.4	44	42.3	45.3	28	27.7	21.4
L-Citrulline	Amino acids	C00327	ko00220,ko01100,ko01110,ko01130,ko01230		3.4	5.3	7.7	50.2	35.7	44.7	0	0	0	2.2	4.1	2.3	9.8	16.2	18.9	0	0	0	4	8.8	65.7	23.4	30.1	3.6	0	0	0	95.6	94.1	100	28.4	45.7	41.5	0	1.5	0
L-Serine	Amino acids	C00065	ko00260,ko00261,ko00270,ko00460,ko00600,ko00630,ko00680,ko00920,ko00970,ko01060,ko01100,ko01110,ko01120,ko01130,ko01200,ko01230,ko01502,ko02010,ko04071,ko04974,ko04978,ko05230		91.7	60.1	53.7	61.5	81.7	77.1	61	29.1	25.1	100	88.1	89.4	46.3	50	45.5	23.4	29.9	28.2	53.2	67.9	29	44.3	49.5	40.1	32.7	42.2	22.5	18.8	14.2	12.4	62.4	65.1	50.9	22.2	40.4	56
L-Aspartic acid	Amino acids	C00049	ko00220,ko00250,ko00260,ko00261,ko00270,ko00300,ko00340,ko00410,ko00460,ko00710,ko00760,ko00770,ko00970,ko01060,ko01064,ko01070,ko01100,ko01110,ko01120,ko01130,ko01200,ko01210,ko01230,ko02010,ko02020,ko02030,ko04080,ko04974,ko05230		70.2	44.8	47.3	85.1	85.1	72	20.8	9.1	12.6	83.9	90.1	83.2	40.3	56.1	40.1	12.2	13.5	14	80.1	100	27.8	40.8	23.5	22.3	9.4	19.8	17.9	12.7	12.9	14	74.5	73.3	20.6	13	28.7	19.5
L-Glutamic acid	Amino acids	C00025	ko00220,ko00250,ko00330,ko00332,ko00340,ko00430,ko00471,ko00480,ko00524,ko00630,ko00650,ko00660,ko00860,ko00910,ko00970,ko01060,ko01064,ko01100,ko01110,ko01120,ko01130,ko01200,ko01210,ko01230,ko02010,ko02020,ko04068,ko04072,ko04080,ko04216,ko04540,ko04713,ko04720,ko04721,ko04723,ko04724,ko04727,ko04730,ko04742,ko04964,ko04974,ko05014,ko05016,ko05030,ko05031,ko05033,ko05034,ko05230		70.6	72	70.1	51.7	66.4	61.6	15.7	9.7	7.3	100	93.4	90	27.2	33.9	41.4	5.9	4.5	3.1	82.5	86.3	29.3	48.8	42	36.5	3.3	5.6	3.6	45.5	24	21.4	40.7	46.6	27.3	3.4	4.4	3.8
L-(-)-Cystine	Amino acids	C00491	ko00270,ko02010,ko04216,ko04974		0	0	0	0	0	0	65.3	94.7	54.7	0	23.3	27.4	30.9	18.3	26.5	64.7	96.3	80.5	22.9	0	0	0	0	45.2	63.2	93.7	81.1	0	0	0	44.3	37.2	33.8	62.6	78.4	100
L-Leucine	Amino acids	C00123	ko00280,ko00290,ko00966,ko00970,ko01060,ko01065,ko01100,ko01110,ko01210,ko01230,ko02010,ko04150,ko04974,ko04978,ko05230		11.6	20.9	23.3	100	89	82.4	6.9	8.1	13.1	9.4	10.9	7	20.4	23.3	13.8	2.5	3.2	2.8	11.3	24.2	26	27.8	18.2	15.2	7.6	17.3	11.7	42.4	58	65.9	22.7	27.7	16.3	17.8	16	16.6
L-Phenylalanine	Amino acids	C00079	ko00360,ko00400,ko00460,ko00940,ko00960,ko00966,ko00970,ko01060,ko01061,ko01063,ko01064,ko01070,ko01100,ko01110,ko01130,ko01210,ko01230,ko02010,ko04974,ko04978,ko05230		56.8	56.1	67.2	82.1	68.9	63.6	22.1	35.4	33.8	38.9	42.2	37.2	36.1	50.5	44.2	13.3	15	12.4	44	64.3	68.2	43.7	41	44.7	31	55.6	41	84.2	100	99.5	62.1	55.1	52.2	53.1	50.5	41.5
L-Threonine	Amino acids	C00188	ko00260,ko00261,ko00290,ko00860,ko00970,ko01060,ko01100,ko01110,ko01120,ko01130,ko01230,ko02010,ko04974,ko04978		43.9	53.1	62.7	41.7	82.8	75.1	25.4	16.3	16.7	50.2	62.2	54.5	48.8	61.2	56.9	10.5	14.3	16	43.3	77	20.6	65.6	68.9	61.7	18	27.4	13.8	13.3	11.6	13.3	90.4	100	85.2	16.4	18.8	23.6
L-(+)-Lysine	Amino acids	C00047	ko00300,ko00310,ko00780,ko00960,ko00970,ko01060,ko01064,ko01100,ko01110,ko01120,ko01130,ko01210,ko01230,ko02010,ko04974		10.3	11.6	17.2	100	67.7	62.5	2.9	4	4.8	4.1	9	6.3	13.1	29.8	26.4	1.6	2	0.9	8.1	13.9	34.4	26.6	22.1	8.9	1.6	5.2	1.5	55.3	77	79.1	35	28.5	28.2	5.7	7.5	5.2
Uridine	Nucleotide and its derivates	C00299	ko00240,ko01100		15.9	28.4	19.5	77.7	100	93.1	13.5	8.4	16.6	14.8	47.7	35	64.7	43	41.9	35.6	51.5	52.2	45	37.9	26.4	38.9	38.3	38.3	34.2	50.4	54.2	2.8	2.5	2.3	29.5	30.6	31.8	16.6	45.3	32.5
L-(-)-Tyrosine	Amino acids	C00082	ko00130,ko00231,ko00261,ko00350,ko00360,ko00400,ko00401,ko00460,ko00680,ko00730,ko00940,ko00950,ko00965,ko00966,ko00970,ko01055,ko01059,ko01060,ko01063,ko01100,ko01110,ko01130,ko01210,ko01230,ko04728,ko04916,ko04917,ko04974,ko05012,ko05030,ko05031,ko05034,ko05230		66	68	74.6	70.7	68	77.5	15.7	24.4	29.6	67.2	63.3	70.1	47.3	90.2	81.7	10.4	17.1	13.3	67.5	90.2	49.1	89.1	96.2	70.4	20.2	43.5	28.3	100	86.1	89.1	94.1	87.6	76.3	42.6	49.1	44.1
Hypoxanthine	Nucleotide and its derivates	C00262	ko00230,ko01100		0	16.4	20.6	100	70.7	66.6	0	0	12	14.4	22.2	7.9	36	36.5	35.2	8.2	15.4	0	11.9	11.3	0	25.1	37.7	54.6	0	6.3	13.2	10.3	12.1	13.5	55	42.6	47	0	0	0
L-Histidine	Amino acids	C00135	ko00340,ko00410,ko00970,ko01060,ko01065,ko01100,ko01110,ko01230,ko02010,ko04974,ko05230		7.8	9.7	23.5	51.1	41.6	55.6	0	0.7	1	5.8	12.3	9	26.4	42.6	41.6	0	0	0	8.8	22.4	61.3	50.3	70.6	50.3	0	0.5	0.8	71.1	100	83.3	74.3	69.4	57.8	0.8	0.6	0.6
Cytosine	Nucleotide and its derivates	C00380	ko00240,ko01100		18.5	34.2	33	41.3	58.5	68.2	2.7	2	1.8	18.4	27.7	20.9	62.8	65.8	84.7	1.8	1.9	1.8	24.5	20.7	4.1	100	77	59.9	2	2.4	1.6	2.4	2.5	2.9	81	62.1	64.8	0.8	1.7	2
L-Valine	Amino acids	C00183	ko00280,ko00290,ko00311,ko00460,ko00770,ko00966,ko00970,ko01060,ko01063,ko01100,ko01110,ko01130,ko01210,ko01230,ko02010,ko04974,ko04978,ko05230		45.1	54.7	58.8	74.6	98.6	100	19.5	19.8	23.1	36.9	43.2	41	52	55.2	46.8	7.4	12	9.4	32.4	62.6	20.2	48.9	41.2	41	20.7	40.8	20.6	40.3	35.5	45.3	54.2	51.1	48	27.1	25.7	27.3
Adenine	Nucleotide and its derivates	C00147	ko00230,ko00908,ko01100		7.4	16	15	100	86.5	64.5	2.4	2.7	4.5	8.6	11.7	7	47.1	30.7	34.7	12.2	8.8	7.2	7.6	12.9	4.7	32.6	33.7	42.6	6.8	5.3	9.4	16.2	21.2	19.8	50.6	44.1	42.9	4.9	5.7	4.8
L-Isoleucine	Amino acids	C00407	ko00280,ko00290,ko00460,ko00960,ko00966,ko00970,ko01060,ko01064,ko01100,ko01110,ko01130,ko01210,ko01230,ko02010,ko04974,ko04978,ko05230		36.6	58.2	59.2	99.5	99.1	100	27.5	39.7	50.5	24.4	37.8	32.9	55.4	55.9	46.9	11.5	16.9	13.7	32.2	70.2	69.2	54	50.7	42	37.3	69.5	44.8	80.3	75.1	99.1	53.8	49.1	46.9	56.1	54.5	57.5
L-(+)-Arginine	Amino acids	C00062	ko00220,ko00261,ko00330,ko00331,ko00472,ko00970,ko01060,ko01064,ko01100,ko01110,ko01130,ko01230,ko02010,ko04974,ko05014,ko05132,ko05142,ko05146,ko05230		4.3	4.6	9.6	54.1	31.1	40.2	0.1	0.1	0.1	2.8	5.4	2.6	14.2	31.1	29.9	0.1	0	0.1	8.1	11.1	80.8	34	38.2	2.3	0	0.2	0.4	74	100	74.6	36.7	39.9	32	0	2	0.3
2-Aminoethanesulfinic acid	Organic acids	C00519?	-		0	100	70.8	44.7	71.7	72.1	44.4	63.5	70.3	0	0	52.5	56.6	39.6	54.8	37	64.8	33.2	0	63	62.1	59.8	71.2	63	0	0	0	0	0	65.8	0	0	58	40.7	0	57.5
2,3-dimethylsuccinic acid	Amino acid derivatives	-	-		76.7	50.1	41.7	68.2	33.4	33.3	12.9	14.5	15.8	60.5	68.4	71	27.4	36.9	43.3	7.3	11.2	8.8	82.4	100	19.1	29.9	51.4	62.8	10.1	8.7	4	41.8	48.6	72.1	45.2	34.9	49.5	9.9	12.9	7.8
N-Acetyl-L-glutamic acid	Amino acid derivatives	C00624	ko00220,ko01100,ko01110,ko01130,ko01210,ko01230		44.6	28.2	23.2	8.9	21.3	24.6	42.1	20.2	21.8	76.6	64	51.8	32	21.9	24	55.3	37.5	52.3	78.7	100	58.4	30.6	11.1	40.2	35.2	51.8	21.7	36.3	23	54.3	25	31.9	41.3	24.6	41.3	31.6
Luteolin	Flavone	C01514	ko00941,ko00944,ko01100,ko01110		9.7	44	17.5	76.7	46.8	29.9	25.9	29.9	30.2	6.5	0	0	0	80.1	52.1	100	89.8	100	0	0	0	0	0	0	63.2	87.3	49	0	0	0	0	0	0	59.6	70.6	62.6
5-Methylcytosine	Nucleotide and its derivates	C02376	ko00240		71.8	72.4	89	42.3	35.3	37.3	24.1	33.3	31.6	56.5	72.4	71.5	28.9	41.3	40.6	12.4	16.3	22.4	82	100	18	40.7	36.8	30.3	16.6	26.9	13.9	20.9	27.9	33.7	50.9	25.7	33	13.2	11.5	11.2
(-)-3-(3,4-Dihydroxyphenyl)-2-methylalanine	Amino acid derivatives	C07194	-		44.5	0	73.4	46.8	60	100	0	31	45.6	72.4	40.8	40.5	31.5	26.2	0	50.7	33.3	30.3	63.7	71	0	31.7	44.5	0	31.3	0	51.4	30.1	44.5	37.3	37.3	40.3	18.1	44.4	26.4	34
γ-Glu-Cys	Amino acid derivatives	C00669	ko00480,ko01100,ko04216		1.1	0	0	71.4	0	100	0	0	0	11	6	4.5	21.8	26.5	36.1	0	0	0	13.6	20	4.8	43.3	43.9	6.6	0	0	0	7.3	8.1	8.3	40.8	60.9	46.6	0	0	0
5-Aminovaleric acid	Amino acid derivatives	C00431	ko00310,ko00330		75.1	77.5	34.7	34.5	51	41.4	33	17.7	17.6	61.9	100	71.3	27.4	40.3	38.1	21.5	45.9	22.9	43.7	99.3	52.8	46.8	44.3	0	0	39.2	25.6	11.6	0	20.6	41	45.4	27.4	14.4	35.6	31.2
N6-Acetyl-L-lysine	Amino acid derivatives	C02727	ko00310		15.3	12.6	13.3	12	15.1	21.3	16.2	13.1	26.8	9.4	6.8	6.5	4.3	8.4	6	9.1	4.1	7.4	9	12.5	22.8	0	0	6.4	11.7	19.7	11.3	72.6	73.3	100	6.2	0	11.2	25.6	22.3	19.7
Glycyl-L-proline	Amino acid derivatives	-	-		19.7	16.1	14.8	33.5	100	68.5	12.9	7.3	4.8	6	20.9	14	65.7	27.7	27.9	5.7	5.5	14	7.2	14.3	6.5	27.3	23.9	41	8.6	8.7	14.3	8.4	9.7	7	57.6	41.4	33.5	2.9	8.8	9.6
D-Alanyl-D-Alanine	Amino acid derivatives	C00993	ko00473,ko00550,ko01100,ko01502		40.1	41.7	28.4	54.3	80.3	56.7	0.1	0.1	0.1	47.6	48.3	40	37.5	38.5	86	0.1	0.1	0.1	42.8	61.2	68.5	50.3	70.2	35.2	0.1	0.1	0.1	51	28.5	25.9	58.4	100	79.8	0.1	0.1	0.1
Asp-phe	Amino acid derivatives	-	-		83.8	64.3	56.7	91	65.7	73.6	53.1	31.8	52.7	54.5	55.2	60.6	54.9	61	74	33.6	57.8	61.7	60.6	71.8	39.7	78.7	67.1	58.8	75.5	54.9	100	37.5	53.8	59.9	88.8	71.8	63.2	80.1	68.2	74
Nα-Acetyl-L-glutamine	Amino acid derivatives	-	-		22.9	13.6	0	29.5	41.6	37.6	16.1	12.3	25.9	10.6	14.6	16	15.7	11.6	13.7	10.6	10.3	15.6	17	10.3	24.8	0	7.3	11.3	8.6	23	13.4	52.4	70.5	100	13	12.6	37.4	20.1	20.2	21.1
Methyl indole-3-acetate	Phytohormones	-	-		27	23	100	81.3	35.9	90.6	1.1	1.5	3.5	1.8	5.8	4.7	10.3	13.4	27.6	1	0.8	0.6	4.9	1.1	0	32.5	15.6	2.7	1.7	1.9	1.1	0	0	0	1.9	1.4	2.7	1.7	1	1.4
L-Homoserine	Amino acids	C00263	ko00260,ko00270,ko00300,ko00920,ko01100,ko01110,ko01120,ko01130,ko01230		28	42	68	81.3	73.1	84.1	9.9	14.4	10.8	35.1	28.4	58.5	45.8	44.3	74.9	10.6	9.6	0	36.3	52.7	21.1	48.7	88.1	55.4	7.7	13.4	18	12.5	13.9	23.7	64.7	51.5	100	10.3	14.2	12.3
β-Nicotinamide mononucleotide	Nucleotide and its derivates	C00455	ko00760,ko01100		9	20.2	14.2	50.6	41.1	35.2	5.6	1.9	2.1	13.1	24.2	14.8	27.2	38.6	37.3	2.3	3.1	3.3	15.8	12.5	34.7	37.3	50.4	58.9	3.8	6.5	2.9	34.2	27	8.5	69.4	100	89.2	8.5	20.1	27.2
N-γ-Acetyl-N-2-Formyl-5-methoxykynurenamine	Amino acid derivatives	C05642	ko00380		16.3	11.3	8.8	0	0	0	21.3	45.1	100	0	8.2	16.6	0	0	0	28.7	39.4	51.3	10.8	12.7	32.5	0	0	0	36.1	53.3	51.3	76.1	53.3	64	0	0	0	57.9	48.4	27.3
Nα-Acetyl-L-arginine	Amino acid derivatives	-	-		13	9.3	11.7	100	79.2	41.3	17.9	17.7	16.6	5.8	6.2	4.9	33.5	6	8.9	14.9	7	15.9	0	6.2	5.4	11.4	8.3	4.8	16.1	17.4	8.1	6	0	0	9.3	11.3	27	8.5	9.7	13.8
N-Propionylglycine	Amino acid derivatives	-	-		32.7	35.6	44.9	100	99.1	94	14.1	24	24.2	11.9	16.3	16.2	28.4	42.1	25.4	7.1	10	12.1	12.3	43.9	35.6	35.3	32.2	20.7	22	50.7	28.1	43.1	51.2	53.5	34.6	23.3	25	51.2	32.4	31.9
1-Methylhistidine	Amino acid derivatives	C01152	ko00340		26.2	28.1	14.4	50.6	55.4	40	0	0	0	22.7	41.8	24.1	64.9	77.9	77.1	0	0	0	27.4	36.1	29.6	78.8	62.3	60.6	0	0	0	43.3	68	59.3	100	68.8	61.5	0	0	0
2-Hydroxy-6-aminopurine	Nucleotide and its derivates	-	-		24	28.8	33.2	100	84	82.6	10.6	10.7	9.1	50	53.2	57.4	50	33.9	30.9	15.6	24.8	28.6	36.9	42.6	25.3	41.8	29.9	47.2	24.5	25.6	22.4	8.2	15.1	13.4	61	56	55.3	12.4	23.1	22.1
N-Glycyl-L-leucine	Amino acid derivatives	C02155	-		0	0	0	97.3	100	77.3	0	0	0	0	13.9	11.3	23.4	34.9	16.2	0	0	0	8.6	11.3	6	13.9	16.3	23.9	0	0	0	0	0	0	40.6	36.4	31.2	0	0	0
Quercetin 3-O-rutinoside (Rutin)	Flavonol	C05625	ko00944,ko01100,ko01110		19.8	67.3	37.4	92.9	73.7	59.2	81.1	85.3	65.5	8.9	10.4	1.7	66.6	56.8	59.9	92.9	73.7	67.3	0.9	1.1	1.1	54.6	47.9	37.4	59.7	52.1	55.2	0.8	0.5	3.8	12	8.2	10.4	88.2	41	100
Quercetin	Flavonol	C00389	ko00941,ko00944,ko01100,ko01110,ko04152		0.7	1.3	0	2.9	10.3	31.3	0.7	0	0	1.1	0.9	0	29.5	28.5	36.6	0	0	0	0	0	1.2	14.4	14.7	3.8	0	0	0	0	0	0	100	68.7	14.4	0	0	0
Kaempferol	Flavonol	C05903	ko00941,ko00944,ko01061,ko01100,ko01110		0	2.6	0	9.8	13.9	13.8	0	0	2.7	0	0.8	0	64.3	66.4	67.3	0	0	4.5	0	0	0	50.7	39.1	5.3	0	0	0	0	0	0	100	55.3	12.9	0	0	0
Catechin	Catechin derivatives	C06562	ko00941,ko01061,ko01110		8.6	48.6	31.1	91.4	86.9	100	0	0	0	16.6	12.9	2.9	60	70.6	63.8	0	0	0	0.1	0.9	0.2	63.3	54.7	21.8	0	0	0	2.1	0.4	0.1	18.6	17.8	18.7	0	0	0
3-Hydroxybutyrate	Organic acids	-	-		0	6.1	3	7.6	15.5	11.4	0	0	0	1.6	2.9	0	4.8	5.3	0	0	3.6	4.8	1.8	1.5	2.5	6.2	12.3	10	0	0	0	8.6	6.3	11.8	100	74.1	88.1	0	0	0
Amentoflavone	Flavone	C10018	-		23.6	28.6	23.7	32.8	100	0	0	0	0	0	6.2	1.8	63.6	69.5	80.2	0	5.2	0	0	0	0	48.1	50.5	25.6	5.4	6.4	0	0	0	0	5.7	0	4.3	0	0	7.3
Methyl jasmonate	Phytohormones	C11512	ko00592,ko01110		33.3	37.1	49.9	17.3	17.2	18.7	44.4	32.5	53.9	30.9	38.7	36	15.1	12.3	0	94.6	83.7	100	43.4	39.4	24.2	18.4	18.7	11.2	74.3	97.6	68.9	14.5	0	0	15.3	19.5	23.2	83.1	94.9	90.1
L-Asparagine	Amino acids	C00152	ko00250,ko00460,ko00970,ko01060,ko01100,ko01110,ko01230,ko04974,ko04978,ko05230		100	16.6	27.3	11.2	7.4	7	46.6	20.4	50.6	41.9	41.7	32.9	5.3	11.2	6.2	10.1	13	15.8	28.4	88.2	7.9	6.1	6.5	7.8	10.8	36.9	20.1	0.8	0.7	0.6	4.3	3.9	4.8	0.9	22.2	7.8
Adenosine	Nucleotide and its derivates	C00212	ko00230,ko01100,ko04022,ko04024,ko04071,ko04080,ko04270,ko04923,ko04924,ko05012,ko05032,ko05034		55.8	46.5	40	100	89.6	83.6	59	51.9	63.6	42.3	79	82.3	88.3	71.9	73	65.7	72.2	80.5	76.4	91.4	80.3	81	87.5	59	75.6	87.8	77.9	44.7	39	42.3	87.3	76.6	72.2	60.5	82.6	84.4
N-(3-Indolylacetyl)-L-alanine	Amino acid derivatives	-	-		0	1.4	1.4	2.8	3	3.3	2.8	4.4	4.8	0	0	1.1	3.3	0	0.6	0.9	1	0.6	0.9	1	1	1.5	2	43.6	1.4	1.9	2	0	0	1.8	95.1	86.5	100	3.6	2.9	4
Kynurenic acid	Organic acids	C01717	ko00380,ko01100		9	9.4	11.6	0.9	0.9	1.1	35.6	53.6	72.2	2.7	4.2	5.6	0.5	0.6	0.4	74.2	89.8	100	5.6	5.2	2.2	0.6	0.5	1.1	85.6	94.4	71.2	1.1	0.5	1.5	0.8	0.9	1.1	64.3	75.6	92.6
Ethyl 3,4-Dihydroxybenzoate (Ethyl protocatechuate)	Organic acids	-	-		11.3	19.3	21.4	22.9	0	25	0	0	0	0	25.9	23.9	0	39.5	49.7	0	12.2	0	30	21.9	13.6	41.6	38.3	17.2	0	0	0	0	12	13.8	76.9	100	82.6	0	0	0
Benzoic acid	Benzoic acid derivatives	C00180	ko00360,ko00362,ko00621,ko00623,ko00627,ko01063,ko01100,ko01110,ko01120,ko01220		100	28.9	29.8	17.9	27.8	13.7	45.9	33.3	25.4	27.2	15.4	39.1	7.9	6.1	9.4	25.6	17.9	27.4	32.2	30.2	41.9	22.5	21.1	14.9	23.4	19.7	24.3	25.4	32.9	12.8	14.4	12.1	11.7	15.6	36.9	26.3
Glutaric acid	Organic acids	C00489	ko00071,ko00310		20.9	22.5	20.6	38.4	34.9	52	4.9	7.8	11.5	41.8	21.3	24	29	47.2	23.4	9.7	13.2	10	17	25.2	7	40.3	34.7	52.6	6.4	6.3	7.1	11	6.3	16.4	100	80.7	88.4	11.2	14.2	10.7
Adipic acid	Organic acids	C06104??	-		67.6	38.5	38.3	31.2	30.3	26.1	13.7	11.1	12.4	47.6	57.6	64.9	25.9	27.1	29.5	6.5	10.8	6.9	89.8	100	14.8	25.9	40.9	41.4	8.1	6.1	5.6	32.5	34.7	46	37.5	29.5	36.9	7	11	5.3
L-Cysteine	Amino acids	C00097	ko00260,ko00270,ko00311,ko00332,ko00430,ko00460,ko00480,ko00730,ko00770,ko00920,ko00970,ko01060,ko01100,ko01110,ko01120,ko01130,ko01200,ko01230,ko04122,ko04216,ko04974,ko05230		0	0	8.9	46.8	100	73.4	0	0	0	16.3	0	19.1	47.4	24.7	42.9	0	0	0	13.8	23.9	36.2	50.7	62.6	7.1	9.8	6.6	9.5	31.5	28	19.7	90.6	83.4	71.4	0	0	8.1
Azelaic acid	Organic acids	C08261	-		82.5	56.8	51.5	68.6	43.2	0	37.3	37	38.8	61.8	53.6	64.5	28.4	0	31.7	27.4	32.8	22	66	100	73.4	44.4	25.4	0	32.8	39.9	49.4	78.7	63.9	86.7	53.3	48.8	53.6	49.4	57.1	27.3
Azelaic Acid	Organic acids	C08261	-		79.6	61.8	67	61.5	74.7	49.1	42.7	37.9	45.3	95.8	67.3	80.3	41.4	34.7	36.6	56	44.7	44.6	79.9	83.4	100	35.5	38.8	53.1	43.8	37.3	58.8	87.1	90.9	89.3	55.1	54	57.6	69	70.9	32.6
N-Acetyl-l-leucine	Amino acid derivatives	C02710	-		4.6	6.9	5.2	100	72.9	50.3	1.9	1.5	3.8	4.3	2.1	2.7	6.3	3.2	3.5	0	2.1	0	1.8	0	2.2	2.1	2.4	9.6	0	0	4.3	8.7	4.9	12.2	88.4	61.6	95.5	4.3	4	3.7
Uracil	Nucleotide and its derivates	C00106	ko00240,ko00410,ko00770,ko01100		6.6	16.5	9.2	68.9	100	99.5	11.4	8.2	20.6	10.5	56	29.4	62.5	40.6	34.3	34.1	73.7	79.8	37.3	43.2	33.4	41.3	36.6	62	45	56.6	56.9	2	3.1	1.8	24.7	44.4	25.9	19.8	63.5	47.4
Sebacate	Organic acids	C08277	-		58.9	86.1	100	0	0	0	0	0	0	97.1	92.1	28.2	60.6	89.2	61.6	0	0	0	23.2	31.1	6.6	0	0	96.7	88.2	64.7	0	12.1	0	0	92.5	84.6	90.7	76.3	67.8	68.5
2-Methylsuccinic acid	Organic acids	-	-		56.9	28.4	20.8	5.3	4.7	5	19.7	15.4	15.1	36.5	49.8	57.5	4.7	5	4.6	9.9	17.3	18	66.3	100	8.1	4.7	4.4	3.5	17.5	17.4	8.6	23.8	27.2	41.1	4.4	3.8	3.5	19	17.2	13.6
6-Aminocaproic acid	Organic acids	C02378	ko00930,ko01100,ko01120		17.5	35.9	42.6	70.8	72.6	100	9	14.5	18.7	10.9	15.3	14.5	28.1	34.6	27.4	4.7	5.8	5.5	11.5	30.6	32.2	29.8	24.3	16.9	14.3	29.6	13.5	31.9	32.2	38.6	33.5	19.6	16.1	22.9	15.7	21.9
2,6-Diaminooimelic acid	Amino acid derivatives	C00666	ko00300,ko01100,ko01110,ko01120,ko01130,ko01230		19.2	28.1	23.8	32.3	100	31.4	20.1	21.3	14.3	8.7	14.3	8.8	45.8	43.4	26.4	24	20.8	29.6	11.6	12.1	14.1	29.5	54.3	54.5	25.1	28.4	32.9	11.9	8.6	9.9	56.9	37.7	66.5	21.6	28.5	42.6
Terephthalic acid	Organic acids	C06337	ko00624,ko00627,ko01100,ko01120,ko01220		55.4	28.7	36.2	13.1	7.2	7.7	46.4	73.7	93.9	28.4	27.5	34.9	11.3	9.8	8.9	83.5	81.7	84.4	41.6	52.8	21.9	9.6	10	14.1	100	88.2	73.7	19.1	18.5	32.7	13.9	13.4	15.4	78.8	79.1	76.7
Phthalic acid	Organic acids	C01606	ko00624,ko01100,ko01120,ko01220,ko02010		42.9	21.2	30.4	12.8	6.1	8.1	48.7	74.1	80.4	19	17.7	23.6	7	8.3	7.2	82.4	67.5	68.5	32.5	46.4	12.8	8.2	5.9	5.6	100	77.6	70	14.5	10.6	28.8	7.2	6.1	8.8	65.4	75.8	67.9
4-Guanidinobutyric acid	Organic acids	C01035	ko00330,ko01100		1.3	1.7	1.6	2.8	2.3	2.6	1.1	1.9	1.7	1.3	1	1.2	4.3	3.2	3.4	1.1	1.4	1.5	0.9	1.3	1.2	6.1	11.7	4	1.6	1.5	1.4	1.8	2.4	1.3	32.8	54.3	100	1.2	1.5	1.8
Caffeic acid	Hydroxycinnamoyl derivatives	C01197	ko00940,ko01061,ko01100,ko01110,ko01220		12.8	16	10.3	100	78	62.1	6.8	3.4	2.1	20.8	16.7	9	37.4	25.2	21.9	2.3	3.4	2.7	14.1	30.6	10.5	18.8	17.2	12.5	4.2	4.3	12.3	13.2	6.8	8.1	17.4	18.7	15.9	4.2	2.3	4.5
Ferulic acid	Hydroxycinnamoyl derivatives	C01494	ko00940,ko01061,ko01100,ko01110		7.5	11.6	7.7	16.8	18.4	18.9	4.2	5.6	8.9	1.8	9.5	8.5	2.4	2.9	2.1	8.2	22.4	26.8	7.9	6.5	6.9	1.9	4.2	9.3	17.4	33	100	2	0.9	2.3	10.1	13.2	11	22	26.8	46
Kaempferol 7-O-rhamnoside	Flavonol	-	-		6.6	18.2	0	0	0	0	27	17.8	25.7	0	0	0	16.1	14	9.1	100	67.8	80.5	0	0	0	0	0	0	25.3	42.3	17.4	0	0	0	0	0	0	22.2	29.7	38.6
Naringenin 7-O-neohesperidoside (Naringin)	Flavanone	C09789	ko00941		11.2	33	10	3	2.7	1.5	64.7	90.5	74.1	0.4	6.1	1.2	0.4	1.4	1.6	32.6	93.5	94.7	0.4	0.4	0.4	1.6	1.5	2.2	76.2	75.3	52.2	0.2	0.2	1.4	0.7	0.6	1.3	82.9	49.4	100
Apigenin 7-O-neohesperidoside (Rhoifolin)	Flavone	C12627	ko00944		16.6	42.9	33.7	100	82.2	99	24.1	39.7	54.9	12.7	0	0	59	34	44.8	32.4	38.7	46.7	0	0	0	49.8	39.4	29.9	35.2	40	27.4	0	0	0	33.3	19	17.5	56.2	37.8	77.8
Daidzein	Isoflavone	C10208	ko00943,ko01061,ko01110		74.3	100	80.9	47.2	41.8	37.4	0.1	0.1	0.1	46.5	56.2	95.6	33.2	32	63	68.9	82.4	63.8	60.4	97.8	31.2	25.3	29	47.8	46.6	88.2	95.6	21.2	23.2	33.2	60.1	43.1	70.7	98.5	88.2	72.9
Apigenin 5-O-glucoside	Flavone	-	-		21.6	40.3	49.8	100	98.4	81.6	10.2	0	0	0	0	0	53.8	69.2	74.1	27.7	25.8	0	0	0	0	62.6	62.6	17.6	0	0	0	0	0	0	53.4	40.3	35.1	33.4	28.5	40.7
Quercetin 3-alpha-L-arabinofuranoside (Avicularin)	Flavonol	-	-		2.6	12.7	6.7	100	42.4	37.1	5.4	5.4	3.6	1.3	1.8	0.3	21.3	41.1	37.5	9.4	5.7	6	0	0.1	0	36.3	32.5	13.2	4.5	6.2	2.8	0.3	0.1	0.2	10.5	7.2	7.6	7.4	2.8	10.6
Chrysoeriol	Flavone	C04293	ko00944		0.1	13.5	9.2	38.4	34.4	48.1	7.5	9.7	13.8	0.1	0.1	0.1	44.9	39.7	34.9	15.1	23.3	11.2	0.1	8.5	0.1	33.8	41.8	31.8	0.1	0.1	0.1	0.1	0.1	0.1	100	95.6	52	0.1	0.1	0.1
Apigenin 7-rutinoside (Isorhoifolin)	Flavone	-	-		0	60.8	35.5	95.9	100	82.1	25.6	64.9	69.6	0	0	0	47.6	48.3	59.5	38.5	59.1	55.4	0	0	0	65.5	39.9	0	36.8	41.6	33.8	0	0	0	39.5	26.8	23.9	77.4	26.7	86.1
Kaempferol 3-O-rutinoside (Nicotiflorin)	Flavonol	-	-		6.6	26	14.8	58.3	48.6	27.6	31.4	56.3	65.3	9	5.6	1.9	20.5	22.7	21.2	100	55.3	65.8	0.8	2.6	0.6	21.7	20.1	10.1	34.8	44.7	32.1	0.9	0.7	1.9	13	12.6	11.9	62.3	45.3	70.9
Naringenin 7-O-glucoside (Prunin)	Flavanone	C09099	ko00941		15.9	45.5	30.5	74.4	66.8	100	67.8	56.7	57.5	4.3	13	2.2	25.8	56.5	48.2	59.6	77.2	74.7	1.6	1.8	0	50.2	26.1	14	51.8	52.1	14.2	3.9	1.1	3.1	6.4	6	7.9	56.7	30.2	66.7
Naringenin	Flavanone	C00509	ko00941,ko00943,ko01061,ko01100,ko01110		0	4.3	2.8	17.1	12.8	6.9	0	0	2.3	1.3	0	0	1.7	3.1	3.4	0	0	0	0	2.5	0	3.9	14.2	80.8	0	0	0	0	0	0	92.3	100	90	0	0	0
4-Methylumbelliferone	Coumarins	C03081	-		16	15.8	19.1	100	59.4	42.1	0	7.2	6.6	10.6	11.7	4.1	29.1	40.4	28.7	0	10.8	8.3	14.6	5	0	33.4	28.1	28.5	10.1	9.2	13.1	0	2.6	0	36.8	31.7	38.7	16.2	12.4	13
Shikimic acid	Organic acids	C00493	ko00400,ko01060,ko01061,ko01063,ko01070,ko01100,ko01110,ko01130,ko01230		44.2	42.5	28.3	0	0	3.9	55.4	37.1	36.5	10.4	10.5	15.4	0	2.7	2.8	100	89.1	63.7	16.1	12.4	7.5	2.9	2.9	0	87	69.9	41.8	10.8	9.4	9.3	2.5	0	0	73.6	45.6	71
Chlorogenic acid (3-O-Caffeoylquinic acid)	Quinate and its derivatives	C00852	ko00940,ko00941,ko00945,ko01110		28.8	30.3	28.8	40.7	44.3	42	40.1	33.5	31.4	29.2	24.7	39.2	40.4	42.3	40.7	25.2	27.4	31.4	42.6	29.1	81.8	43.6	29.4	32.7	36.6	34.6	33.2	41	100	39.2	34.3	27	31.9	35.5	38.1	32.9
Syringic acid	Hydroxycinnamoyl derivatives	C10833	ko00627,ko01120		82.8	36.5	27.3	42.6	22.5	0	71.2	31	53.5	92.9	54.5	87.4	0	0	0	90.9	75.8	49.6	89.9	52.5	39.6	0	0	41.5	83.8	54.5	73.7	0	29	0	0	0	0	100	77.3	0
Vanillin	Benzoic acid derivatives	C00755	ko00360,ko00627,ko01061,ko01063,ko01100,ko01110,ko01120		4.3	0	0	0	0	0	3.2	6.3	26.9	0	1.4	2.6	0	0	0	17.2	35.5	85.4	2	1.8	1.9	0	0	0	57.3	61.6	61.6	1.6	0	0	1.6	1.9	2.1	53.9	100	80
3-(4-Hydroxyphenyl)propionic acid	Hydroxycinnamoyl derivatives	C01744	-		0	0	9.1	17.3	18.7	7	0	0	0	0	15.4	5.4	41.6	55.8	76.6	0	0	0	3.7	5.9	5.6	74	93.7	98.9	0	20.3	13.4	5.7	0	4.1	100	86.6	66.2	0	0	0
3-Hydroxy-4-methoxycinnamic acid	Hydroxycinnamoyl derivatives	-	-		4.2	9.9	5	15.1	11.9	22.3	4.2	3.9	10.1	2.3	9.1	9.7	2.8	4.1	2.6	7.2	19.4	23.5	8.4	6.9	7.3	2.4	3.5	7.1	14.7	30.9	100	0	0	0	8.3	9.5	7.3	19.8	23.5	42.9
3,4,5-Trimethoxycinnamic acid	Hydroxycinnamoyl derivatives	-	-		62.6	28.4	31.5	0	0	0	0	65.5	78.6	0	0	21.9	12.1	0	0	58.8	70.2	48.3	22.4	18.7	0	0	0	0	55	100	57.1	0	0	0	0	0	0	76.5	68.9	0
Procyanidin A1	Proanthocyanidins	-	-		0	3.4	0	20.9	29.5	100	0	0	0	1	1.6	0	19.6	19.2	15	0	0	0	0	0	0	9.1	4	0	0	0	0	0	0	0	0	0	0	0	0	0
Procyanidin B2	Proanthocyanidins	-	-		0.4	15.6	4.6	49	50.3	100	0	0	0	4.9	3.9	0.9	28.1	44.5	36.5	0	0	0	0	0.1	0	26	19.3	3.8	0	0	0	0.3	0	0	2.1	2.2	2.2	0	0	0
Procyanidin B3	Proanthocyanidins	-	-		0.9	29.7	11.6	83.5	86.4	100	0	0	0	20.8	17.7	6.8	73.9	81.3	77.3	0	0	0	0.1	0.7	0.1	73.2	64.6	12.4	0	0	0	1.6	0.3	0	12	12.5	13.9	0	0	0
Delphinidin	Anthocyanins	C05908	ko00941,ko00942,ko01110		0	0	14.2	100	32.3	34.7	35.3	39.6	36.2	0	0	0	33.7	35	25	0	55.6	64.2	0	0	0	17.2	9.4	4.4	26.4	34	0	0	0	0	0	0	0	65.4	16	71.9
Malvidin 3-O-galactoside	Anthocyanins	-	-		37.6	47.7	28.6	57.5	42.7	48.8	89.5	59.3	48.1	26.4	14.7	27.3	59.1	66.2	69.4	45.9	41.6	38.3	23.9	47.4	35.3	62.2	34.5	27.1	38	51.2	62.9	45.6	63.8	48.5	22.4	33.3	40.5	62	59.7	100
Malvidin 3-O-glucoside (Oenin)	Anthocyanins	C12140	ko00942		41	49.3	42.8	44.8	48.3	56.8	100	65	49.8	50	52.3	50.3	91	66.3	62.3	79	57.5	40.5	48.5	29.8	33.8	88.8	58.3	30.5	60.8	67.3	88.3	68.5	68	66.5	45	46.5	49.8	76.8	73.5	98.5
L-Epicatechin	Catechin derivatives	C09727	ko00941,ko01061,ko01110		7.2	47.8	29.9	71.8	100	94.9	0	0	0	18.4	15.8	3.3	68.5	0	70.5	0	0	0	0.1	0.9	0.2	65.7	64.2	26.7	0	0	0	1.7	0.3	0.1	13.3	20.6	23.4	0	0	0
L-Theanine	Amino acids	C01047	-		34.6	21.2	26.9	100	38.8	35.3	13.3	7.7	8.2	14.6	12.6	20.7	23.6	17.5	23.8	6.9	10.3	12.3	10.4	15.6	0	23.4	0	0	11.8	10.5	13.3	9.5	0	0	10.5	6.3	10.3	10.5	12.7	12.1
Methylmalonic acid	Organic acids	C02170	ko00240,ko00280,ko00640		45.4	41.7	61.9	49.9	50.9	84.8	41.7	43.7	77.2	46	57.2	52.3	25.4	27.3	29.9	59.3	54.6	55.7	54.8	60.9	42.3	31.4	40.7	44.4	53.9	44.3	52.1	31.1	28.1	34.7	26.8	27	30.6	68.1	100	86.9
Nicotinic acid	Nicotinic acid derivatives	C00253	ko00760,ko00960,ko01060,ko01064,ko01100,ko01110,ko01120,ko05133		17.2	13.4	17.4	15.9	18	18.4	2.1	1.5	1.7	23.4	31.8	27	39.7	47.4	54.4	1.5	2.6	1.4	22	19.8	5.9	53.8	64.6	100	1	1.6	0.9	11	16.4	14.1	70.8	78.4	74.4	0.9	2.6	1.3
6-hydroxynicotinic acid	Nicotinic acid derivatives	C01020	ko00760,ko01120		58.3	16	41.7	0	0	0	0	0	39.5	77.1	81.8	84.8	26.4	0	0	54.9	50.8	0	83.4	78.3	43	41.9	0	48.1	31	44.5	33.8	39.1	39.8	13.8	79.5	57.4	100	57	58.4	48.9
D(+)-Melezitose	Carbohydrates	-	-		6.3	23.3	26	14.4	39.3	29.8	1.6	2	1.9	48.6	19	34	51.1	60.6	77.9	3.6	2.4	2.2	11	5.6	17	24.8	30.7	17.2	0.8	1.4	1.3	100	90.5	56.7	16.1	21.3	28	0.8	1.7	1.6
Inositol	Others	C00137	ko00052,ko00053,ko00521,ko00562,ko01100,ko01120,ko01130,ko02010,ko04070		69	100	90	3.8	4.8	7	79.2	72	68.2	35.4	31	42.6	8.7	9.1	7.6	85.8	85.3	93.6	38.2	17.3	24.9	7.8	8.2	9.3	96.1	78.3	56.6	12.6	9.1	8.3	8	9.2	9.4	56.7	54.4	68.6
D-(+)-Sucrose	Carbohydrates	-	-		54.7	62	58.9	64.6	82.3	84.9	16.3	17.8	12.6	55.2	54.2	47.2	77.6	80.2	89.6	6.5	7.7	4.4	42.5	41.4	74.5	84.9	100	81.3	4.9	5.3	6	76	62	59.4	82.3	93.8	99	2.1	3	2.3
Gluconic acid	Carbohydrates	C00257	ko00030,ko01100,ko01110,ko01120,ko01130,ko01200		56.5	40.1	39.8	41.6	34.5	38.3	40.2	35.2	40.9	41	42	48.4	21.1	15.8	17	31.4	31.4	27.7	38.3	35.6	35.7	17.1	13.8	18.3	26.5	28.7	29.8	35.9	44.4	43.6	67.7	83.3	100	32.4	26.9	24.5
Indole-5-carboxylic acid	Indole derivatives	-	-		2.4	3.4	2.8	4.7	9.2	11.2	0	1.6	2.1	3.3	2.7	1.4	2.6	3.1	3	0	0	0	1.7	2.3	0	3.3	9.8	10.4	1.1	1.1	0.8	0	0	0	100	82.3	85.5	0	0	0
L-Tyramine	Amino acids	C00483	ko00350,ko00680,ko00950,ko01060,ko01063,ko01110,ko04080,ko04974		2.8	1.8	1.6	1.5	0	0	1.2	0.6	1.4	2.3	5.2	5.7	0	1.7	1.7	0	1.4	1.1	4.5	10.8	0.8	2.4	1.4	12.9	3.6	3	100	1.7	1.2	2.5	1.4	2.1	2.3	11.7	8.1	6.9
Menaquinone (K2)	Vitamins	C00828	ko00130,ko01100,ko01110,ko02020,ko04977		33.9	30.4	35.7	48	18.7	14.6	14.3	14.2	30.6	26.6	18.3	16.1	16.4	22.6	31	17.8	18.9	20.1	12.5	14.4	58.4	19.8	26.5	36.5	16.9	33	61.4	34.7	36.3	34	17.3	16.3	27.4	100	62	36
Glutathione oxidized	Amino acid derivatives	C00127	ko00480,ko04216,ko04918		16	19.4	13.1	100	18.9	25	4	3.9	5.3	28.1	27.3	34.7	23.3	25	24.2	7.8	9.4	9	34.2	44.7	78.3	22.2	17.4	11.9	6.9	13.5	11.4	56.6	74.3	78.8	36.9	23.7	15.7	11.9	28.2	18.5
D-(+)-Glucono-1,5-lactone	Carbohydrates	C00198	ko00030,ko01100,ko01110,ko01120,ko01130,ko01200		34.8	31.8	32.7	14	19.3	18.3	26.3	27.2	34.4	19.6	28	33.1	15.5	16.3	25.7	21.4	21.2	22.7	29.3	31	71.5	23.4	19.2	20.6	24.4	33.5	33.8	86.4	100	92.6	12.7	15.7	17.4	18.1	24.8	21.4
Guanine	Nucleotide and its derivates	C00242	ko00230,ko01100		2	5.3	8.4	100	51.4	62.2	1.4	0.6	1.7	2.6	13.8	13.1	14	5.9	5.6	8.5	16.5	22.5	6	10.3	8.5	13.9	7.2	10.3	9.2	10.5	28.3	1.3	1.3	1.2	14.3	12.7	11.8	7.9	19.5	13.7
Inosine	Nucleotide and its derivates	C00294	ko00230,ko01100		33.7	25.2	23.4	1	1.6	1.2	78.6	98.5	79.5	6.7	9.8	16.3	1.8	1.2	0.9	98.6	100	58.8	17.9	13.2	3.6	1.7	0.5	0.5	78.3	59.4	45.6	2	1.7	4.7	0.4	0.4	0	58.5	47	52.9
lactucopicrin	Others	-	-		24.1	40.6	41.7	100	86	54	0	13.7	0	18.6	17.7	0	61.5	76.6	81.3	0	16	0	0	6.7	0	56.5	60.4	28.6	0	0	0	0	0	0	16.6	17.9	12.8	0	0	0
Allopurinol	Others	-	-		72.2	38.4	47.4	78.5	62.3	45.4	75.2	100	70.2	20.8	0	0	0	51.3	79.8	40.7	50	27.1	0	0	0	0	38.7	71.9	49.7	19.6	0	0	0	0	39.4	43.4	42.1	0	0	15.6
Guanosine	Nucleotide and its derivates	C00387	ko00230,ko01100		12.9	18.9	16	100	85.5	82.3	12.2	10	13.1	13.2	39.1	36.9	60.9	46.7	38.7	15	24.4	17.1	36.1	34.8	29.6	49.2	50.5	70.6	15.6	22	25.5	6.9	6.3	6.3	45.8	47.1	46.7	12.5	24.6	20
Deoxyguanosine	Nucleotide and its derivates	C00330	ko00230,ko01100		0	8.9	10.2	71	27	29.8	5.5	0	5.3	6.8	18.7	20.4	21.7	19.2	21.2	5.3	11.4	6.9	13.6	13.8	12.8	21.5	23.8	100	6.8	10.2	6.6	0	0	0	48.6	35.6	39.8	5.4	12.4	11.8
Deoxycytidine	Nucleotide and its derivates	C00881	ko00240		33.9	36.4	42.8	40	29	29	6.4	6	8.5	33.9	74.9	100	11.5	21	20.7	13.3	13.3	8.5	85.3	87.5	5.3	24	20.2	15.1	7	9.9	4.1	0	0	0	17.4	18	23	2.4	2.7	0
Phloretin	Flavanone	C00774	-		6.3	9	10.8	28.2	77.7	98.3	0	0	0	5.5	82	21.9	20.5	22.1	43.3	0	0	0	15.9	43.8	56.1	58.1	35.9	21.3	0	0	0	15.4	5	6.8	100	61.3	78.1	0	0	0
L-Methionine	Amino acids	C00073	ko00270,ko00966,ko00970,ko01060,ko01070,ko01100,ko01110,ko01210,ko01230,ko01523,ko04974,ko04978,ko05230		31.3	14.8	11.5	100	74.4	57.1	2.7	2.6	2.9	31	42.5	38.9	26.2	23.9	19.3	2.9	4.3	4.3	23.1	20.7	14	19.6	12.1	11.9	3.2	5.4	5	4	5.4	5.7	17.6	15	9.2	4.1	6.2	4.4
2-Picolinic acid	Organic acids	C10164	ko00380,ko01100		14.7	10.9	12.8	13.8	16	14.5	1.6	2.2	1.8	23.1	27.1	22.5	40.5	31.8	37.3	1.2	2.7	1.6	17	18.8	5	46.3	58.5	100	1.1	1.7	1.2	8.8	11.4	10.1	56.9	69.1	48.1	1	1.8	1.8
5-Hydroxy-L-tryptophan	Amino acid derivatives	C00643	-		50.9	49.7	41.6	0	0	0	51.3	46.8	32.9	52.2	43.5	55.7	0	0	0	33.7	42.9	60.2	56.5	58	64.2	0	0	0	49.9	46.4	83.2	0	0	0	0	0	0	60.5	61.5	100
S-(methyl)glutathione	Amino acid derivatives	C11347	-		29.5	26	29.2	9	8.7	11.5	5.6	5.7	6.4	100	51.1	60.5	10.9	11.6	7.9	5.2	8.5	7.2	55	58.9	90.8	14.8	9.1	5.4	4.9	9.2	12.1	53.9	46.8	43.4	17.6	16.7	13.4	13.3	23.4	16.8
S-(5'-Adenosy)-L-homocysteine	Amino acid derivatives	C00021	ko00270,ko01100,ko01230		4.2	4.6	3.1	100	21	22.9	1.4	1	0.9	1.7	3.4	3.1	6.2	9.6	8.6	0.8	2.7	1.5	2.8	3.1	11.7	8.8	5.2	1.7	1.6	2.7	2.6	2.7	2	3.6	3.3	3.4	5.3	1	3	2.5
Xanthosine	Nucleotide and its derivates	C01762	ko00230,ko00232,ko01065,ko01100,ko01110		48.9	33.3	40.1	68.1	40.1	44.7	76.6	90.1	100	8.3	26.2	20.2	22.6	26.9	33.1	35.5	66.3	71.6	10.6	9.5	39.7	22.5	30.4	43.3	82.3	45	17.4	38.7	33.8	24.6	78.7	70.6	81.9	11.8	21.1	23.9
N'-Formylkynurenine	Amino acid derivatives	C02700	ko00380,ko01100		0	29.3	10.8	24.1	0	25.7	37.2	38.9	76.6	0	0	0	0	20	15.2	34.7	30.7	35.4	0	0	0	21.8	22.4	21.3	34.6	72.4	65.3	19.8	25.8	24.5	59.8	35.2	28.5	74.9	72.4	100
8-Hydroxyguanosine	Nucleotide and its derivates	-	-		20.5	9.9	21.4	21.2	11.2	0	18.9	30.7	36.1	10.5	17.3	17.7	17.7	20.5	10.3	42.1	63.5	46.9	29.5	15.6	34	22.8	16.4	21.2	85.7	64.9	79.5	12.5	21.8	19.2	17.9	19.4	16.7	62.7	79	100
Nicotinic acid adenine dinucleotide	Nucleotide and its derivates	C00003	ko00190,ko00730,ko00760,ko01100,ko04152,ko04211,ko04212,ko04925,ko04977		5.9	11.2	6.4	100	37.2	25.8	2.5	2.5	3.4	2.3	3.8	4.3	9.7	6.1	14.5	2	2.6	1.4	4.8	3.3	12.6	10.3	14.5	5.6	2.1	1.6	5.4	8.7	6.2	8.2	4.1	7.1	5.9	8.3	9	6.4
L-Pipecolic acid	Amino acid derivatives	C00408	ko00310,ko00960,ko01060,ko01064,ko01100,ko01110		12.2	8.3	7.8	12.7	34.2	42.7	0	0	0	24.7	21.1	26.1	9	16.7	16.1	9.2	9.3	5	24.2	100	12.4	15.6	20.8	15.9	0	9.1	14.4	0	0	10	12.2	16.8	21.1	7.5	15.5	0
2'-Deoxycytidine-5'-monophosphate	Nucleotide and its derivates	C00239	ko00240,ko01100		0	0	0	75.3	50.2	52.6	0	0	0	83.3	69.3	28.9	37.1	26.6	29.5	0	0	0	56.6	69.3	93.2	30.1	20.8	0	0	0	0	73.3	100	82.5	43.4	34.5	28.2	12.4	0	13.2
1-Methyladenosine	Nucleotide and its derivates	C02494	-		61.7	65.4	53	36	34.8	19	87.2	100	58.8	22.9	40.6	55.9	15.6	12.2	19.3	55.9	40.2	32.9	28.9	23.1	7.6	8	6.9	12.6	20.7	27.4	8.9	6.2	8	7.1	28.5	22.2	30.7	7.7	13.4	25.6
Pyridoxine	Vitamins	C00314	ko00750,ko01100,ko01120		42.4	43.2	43.3	66	71	81.7	4.6	2.9	2.7	21.6	21.9	20.3	44.1	52.5	41	1.3	2.6	0.9	24.8	30	100	47.1	42.6	53.4	1.1	2.5	2.4	55.9	57	61	49.5	49.6	52.9	1	5.4	1.5
Delphinidin 3-O-glucoside (Mirtillin)	Anthocyanins	C12138	ko00942		4.2	21.9	16.2	89.7	100	47.7	1.8	2.6	1	4.3	1.7	0.6	66.8	44.4	54.7	3.9	2.3	0.9	0	0.3	0.2	32.2	34.3	7	1.2	1	0.5	1	0.2	0	1.8	0.9	1.1	3.3	0.9	3.1
L-Glutamine	Amino acids	C00064	ko00220,ko00230,ko00240,ko00250,ko00471,ko00630,ko00910,ko00970,ko01060,ko01100,ko01120,ko01230,ko02010,ko02020,ko04724,ko04727,ko04964,ko04974,ko04978,ko05230		17.8	14.7	15.1	100	85.2	68.1	1.9	1.3	1.6	30.6	33.6	30.8	55.9	43.9	43.2	1.1	1.7	1.3	26	45.4	71.4	56.6	46.3	34.1	1	3.4	4.4	4.3	3.8	2.8	25.3	26.4	14.7	1.8	7.8	3.4
L-Tryptamine	Tryptamine derivatives	C00398	ko00380,ko00901,ko01060,ko01063,ko01100,ko01110,ko04080		2.8	12.3	10.1	1.4	0	0	5.5	61.7	73.6	0	0.9	0	0	0	0	16.1	8.6	25.3	0	1.1	0	0	3.1	3.5	57.5	100	0.9	0	0	0	11	17.6	12.6	3.3	18	14.6
L-Methionine methyl ester	Amino acid derivatives	-	-		76	82.8	74.6	100	0	0	15.1	13.1	18.3	52.4	52.4	54.9	59.9	58	52	0	0	0	51.2	51.5	44.1	54.8	24.8	16.8	11.2	0	21.5	24	22.9	30.1	34.5	17.5	20.1	12.7	9.4	10.2
Hydrocinnamic acid	Hydroxycinnamoyl derivatives	C05629	ko00360,ko01120,ko01220		14.9	20.9	0	95.9	62.8	37.5	0	0	0	17.2	0	0	100	67.7	52.4	0	0	0	0	0	0	66.2	43.1	0	0	0	0	0	0	0	43.5	29.9	37.2	0	0	0
Coniferylaldehyde	Hydroxycinnamoyl derivatives	C02666	ko00940,ko01061,ko01100,ko01110		25.2	16.4	16.4	2.5	4.1	4.1	44.1	44.2	50.7	0	0	0	0	0	0	23	42	28.1	0	0	0	0	0	6.8	37.1	23.7	100	0	0	0	6.3	4.3	7.2	19.5	27	19
Syringin	Hydroxycinnamoyl derivatives	C01533	ko00940		1.8	16.3	4.5	2.7	2.3	1.6	30.1	71.8	24.6	0.5	0.7	0.3	2.5	1.7	1.5	100	29.3	26.7	0.5	0.8	0.7	2.1	1.6	1.1	26.3	48.6	82.5	0	0	0	0.4	0.4	0.6	31.2	9	49.5
p-Coumaric acid	Hydroxycinnamoyl derivatives	C00811	ko00130,ko00350,ko00360,ko00940,ko00950,ko01061,ko01100,ko01110,ko01220		35.7	46.6	39.3	100	72.4	74.5	48.2	26.1	18.5	23.1	14.4	7.9	53.3	56.3	55.5	29	31.4	0	0	17.5	0	65.6	60.9	31.8	16.8	20.8	0	0	0	0	23.3	0	0	24.8	15	24.9
Melatonin	Tryptamine derivatives	C01598	ko00380,ko01100,ko04080,ko04713		26.1	31.5	46.9	0	0	44.5	27.3	23.8	39.1	44.5	32.9	25.5	0	0	0	38.7	40.3	44.5	0	24.3	45.3	0	0	45.7	47.8	49.4	100	0	0	0	0	0	49.8	26.4	28.5	44.9
Resveratrol	Hydroxycinnamoyl derivatives	C03582	ko00945,ko01061,ko01110,ko04211,ko04212		73.5	69.1	65.3	69.4	0	15.6	94.5	76.3	83.2	17.5	0	13.1	22.4	31.1	0	78.4	67	100	28.4	15.7	0	34.4	25.7	0	69.8	60.8	22.4	15.3	9.1	15.1	20.1	0	22.7	90.7	37.8	47.4
Vanillic acid	Hydroxycinnamoyl derivatives	C06672	ko00627,ko01120		30.9	0.1	0.1	73.9	58.9	55.7	0.1	34.8	0.1	0.1	0.1	0.1	53.4	68.8	96.8	0.1	0.1	0.1	0.1	14.6	0.1	100	46.6	0.1	0.1	26.1	0.1	0.1	0.1	0.1	0.1	29.4	27.1	0.1	0.1	64.3
5'-Deoxy-5'-(methylthio)adenosine	Nucleotide and its derivates	C00170	ko00270,ko00908,ko01060,ko01100		73.8	63.1	68.4	71.1	43.5	44.2	26.3	31.7	32.6	55.1	65.8	54.2	30.9	37.9	33.2	25.5	43.5	21.1	100	95.3	47.2	34.9	24.8	11	53.2	65.1	56.1	20	20.4	27	15.7	13.9	14.4	39.5	60.8	56.1
Myricetin	Flavonol	C10107	ko00941,ko00944		13.1	31.4	8.1	1.7	1.5	1.8	72.6	63.8	51.1	1.1	6.1	1	0.7	0	0	92.3	96.8	77.4	0	0	0	1.5	1.5	0.7	75.3	80.1	15.6	0	0	1	0	0	0	72.9	39.4	100
Epigallocatechin (EGC)	Catechin derivatives	C12136	ko00941,ko01110		11.1	21.3	9.6	100	100	69.8	4.5	5.6	5.5	0	15	0	78.7	42.5	32.9	0	5.1	0	7.5	13.8	0	46.8	56.8	72.6	6.6	7.2	10.3	12.9	11.7	9.8	29.4	0	0	4.4	8.3	0
Nobiletin	Flavone	C10112	-		43.6	28.2	25.9	23.8	24.1	20.4	26.8	39.7	23.6	28.8	28.8	27.2	29	18	22.4	24	20.6	26.2	18.7	25.2	27.4	26.7	20.1	20	18.8	22.7	33.7	33.7	26.2	34	29.6	26.4	22.7	100	77.3	53.7
Dihydroquercetin (Taxifolin)	Flavonol	C01617	ko00941,ko01061,ko01100,ko01110		3.9	21.3	9	55.3	85.1	79.5	3.7	3.4	3.1	10.4	3.6	0	33.5	21.8	19	2.5	2.5	4.2	0	2.6	3.2	21.4	33.4	100	3.8	0	0	16.6	0	4.5	75.9	62.1	85.6	3.8	3.5	3.4
(+)-Gallocatechin (GC)	Catechin derivatives	C12127	ko00941,ko01110		0.7	0	0	2.6	2.8	3.8	0	0	0	2.6	0	0	10	1.5	1.4	0	0	0	0	0	0	1.6	3.7	1	0	0	0.6	7.8	2	1.1	51.8	70.6	100	0	0	0
Isorhamnetin 3-O-neohesperidoside	Flavonol	-	-		8.9	18	5.6	0.1	0.1	0.1	18.5	40.2	54.7	1.1	5.5	1	0.2	0.2	0.3	77.9	66.9	68	0.4	0.4	0.4	0.6	0.5	0.7	55.4	56.6	19.4	0.3	0.3	2.4	0.6	0.6	1.6	90.1	56	100
Tangeretin	Flavone	C10190	-		43.2	24.6	26.3	16.1	22.7	19.8	33.3	42.3	26.1	30.4	25.6	29	27.5	26.3	22.8	27.3	23.1	24.6	22.5	31.4	27.1	29.5	21.3	20.6	20.7	22.5	30.7	45.2	39.6	38.9	18	21.8	22.3	100	97.6	45.9
Myricetin 3-O-rhamnoside (Myricitrin)	Flavonol	C10108	-		8.9	20.7	10.7	0	0	0	44.1	76.7	47.8	0	0	0	0	0	0	85.3	77.1	64.5	0	0	0	0	0	0	55.5	45.7	17.3	0	0	0	0	0	0	48.2	25.2	100
Epicatechin gallate (ECG)	Catechin derivatives	-	-		63.2	59.4	53	3.6	8.6	7.2	61.2	100	92.5	21.7	19.9	29.3	8.6	2.9	5.4	69.3	72.8	73.9	19.2	16.2	4.1	2.8	3.3	5.6	59.1	52.2	29.6	9.3	6.6	4.3	1.7	2	1.3	35.9	28.8	20.7
Orobol (5,7,3',4'-tetrahydroxyisoflavone)	Isoflavone	C10510	-		86.3	94.4	0	0	0	65.3	0	0	31.5	100	76.2	31.2	33.8	38.3	0	0	41.9	0	35.5	23.3	0	78.2	0	0	0	0	0	12.1	0	0	69.4	84.7	87.5	0	0	38.9
Eriodictyol	Flavanone	C05631	ko00941,ko01110		0	0	0	16.7	9.7	22.3	0	4.1	2.9	0	4.3	4.3	0	0	0	0	0	0	0	5.8	4.7	0	9.8	100	0	0	0	0	0	0	31	29.1	37.1	0	0	0
Daidzein 7-O-glucoside (Daidzin)	Isoflavone	C10216	ko00943		7.4	0	9.6	7.3	0	11.9	12.1	7.6	0	19.3	22.5	79.3	7.9	5.2	21.4	15.2	31.8	17.4	15.6	100	13.6	9.4	6.2	26.7	0	0	12.8	10.8	0	16.4	12.9	9.2	55.8	12.1	34.8	0
Hesperetin 5-O-glucoside	Flavanone	-	-		39	76.5	62.3	100	99.6	95.4	39.7	43.2	30.3	33.3	26.7	5	91.2	95.2	96.3	53.9	33.6	27.6	1.4	3.1	0.5	99.1	97.6	78.9	18.8	21.1	21.1	7.6	0.7	3.7	55.7	50.7	49.4	52	21.5	58.8
Kaempferol 3-O-robinobioside (Biorobin)	Flavonol	-	-		6.4	26	14.3	56.7	47.9	29.5	34.1	57.7	62	8.7	5.6	2	20.7	20.2	21	100	54.8	61.5	0.8	2.7	0.6	22	19.4	10.6	36.7	46.6	31.8	1	0.6	1.8	13.7	11.9	10.7	58.7	41.9	73.1
Isohemiphloin	Alkaloids	-	-		15.5	46.4	16.7	21.5	19.9	24.1	80.3	80.3	89.1	3.4	5.9	5.3	17.3	18.8	19.5	93.4	100	89.1	12	12.8	8	13.7	13.2	6.9	53.3	60.7	33.5	13.2	4.1	7.7	7	10.4	9.3	93.4	57.1	89.8
Kaempferol 3-O-glucoside (Astragalin)	Flavonol	C12249	ko00944,ko01110		26.4	41.9	35	92.1	100	69.5	10.5	20.5	19.3	31.6	23.3	10.9	42	71.3	56.3	33.5	16	20.8	5.8	12	1.1	66.2	60.1	28.3	10.4	22.5	13.4	14.3	2.2	6.8	61	61.8	66.5	32.6	27.7	29.6
Arctiin	Others	C16915	-		0.5	1.8	0.9	100	13.6	8.9	0.2	1.8	0.2	2.7	1.3	0.5	77.8	82.3	69.1	0.4	0.2	0.3	0.4	0.6	0.5	92.7	74	15.4	0.2	0.3	0.8	0.3	0.2	0.3	13.3	8.2	8.8	0	0	0
sesamolin	Others	-	-		38.2	37.3	50.3	67.6	25.4	21.2	16.4	17.9	47.1	36.6	35.3	25.9	24.3	33.3	49.3	31.7	28	37.9	20	24.4	70.9	25.5	39.2	62.7	22.8	69.9	98.7	49.7	40.2	43.1	30	28	49.3	100	53.3	46.1
Pinoresinol	Hydroxycinnamoyl derivatives	-	-		9.9	9.4	6.7	0	0	0	7.4	6.8	10	4.7	9	7.7	0	3.3	3.7	21.9	6.7	4.4	8.1	4.6	12.3	3.4	5.9	24.9	5.7	0	100	0	3	2.6	89.3	85.5	98.2	17.5	5.6	3.5
Indole 3-acetic acid (IAA)	Phytohormones	C00954	ko00380,ko01070,ko01100,ko04075		2.3	3.3	7.8	73.7	39	100	0.5	0.7	0.9	2.5	5.1	1.2	13.9	22.8	42.9	0	0	0	0.9	0.3	0	60.5	48.9	4.8	0.5	0.3	0	0	0	0	1.8	1.5	4.2	0	0	0
Salicylic acid (SA)	Phytohormones	C00805	ko00360,ko00621,ko00624,ko00626,ko01053,ko01061,ko01070,ko01100,ko01110,ko01120,ko01130,ko01220,ko04075,ko04976		34.6	0	0	0	0	62.7	31.1	47	44.5	34.3	9.7	27	10.9	8.3	8.7	11.1	17	17.6	15.3	0	0	0	0	0	100	13.3	0	23	19.7	16.2	0	0	23.3	4.7	0	0
Isovitexin 7-O-glucoside (Saponarin)	Others	C08064	-		0	13.2	0	0	0	0	65	43.5	48.3	0	0	0	37.3	21.2	22	43.8	53.4	33.1	0	0	0	22.5	23.6	0	52.3	65.8	0	0	0	0	0	0	0	94.4	76	100
D-Pantothenic dcid	Organic acids	C12276	-		27	0.8	3.2	1.3	0.8	1.6	5.3	4.4	10.8	1.4	1.4	2.7	0	0.2	0.2	5.4	8.7	16.8	1.9	1.8	0.7	0.1	0.2	0.1	9.1	8.1	12	0.3	0.5	0.6	0.3	0.3	0.3	100	20.7	16.4
Acetylcholine	Cholines	C08201	-		5.2	9.9	9.3	3.9	10.4	9.6	2.6	2.5	0	17.6	17.6	15.6	16.7	16.1	15.7	2.7	2.6	3.4	26.8	13.2	7	18.1	20.9	33.4	5.6	3.7	2.3	5.7	10.6	7.2	42	50.7	100	0	0	5.2
Inosine 5'-monophosphate	Nucleotide and its derivates	C00130	ko00230,ko01060,ko01065,ko01070,ko01100,ko01110,ko01130,ko01523,ko04742		2.6	4.8	2.3	100	27	33.3	0	0	1.8	3.7	7.2	3.2	5.1	10.8	6.8	0	0	0	2.9	7.2	3.4	8.6	7.7	6.6	0	0	0	0	2	0	3.9	2.8	3.9	3.3	3.4	2.5
Sinapic acid	Hydroxycinnamoyl derivatives	C00482	ko00940,ko01061,ko01100,ko01110		1.6	4.8	3.8	59	79.4	100	2.2	2.1	3.7	13.6	10.3	4.1	21.2	14.6	7.3	0	0	0	5.2	2.9	3.9	10.7	7.1	17.7	2.5	2.4	1	1.9	1	1.7	17.2	15	23.2	3.6	3.1	0
Nicotinic Acid Methyl Ester (Methyl Nicotinate)	Vitamins	-	-		21.6	18.5	22.9	74.8	43.6	48.3	5.4	9	9.3	45.1	28.4	34.8	68.6	85.9	82.1	27.6	18.5	11.6	21.2	26.1	73.1	87.6	65	84.8	19.8	19.4	52.1	38.7	53.6	100	60.3	62.8	73.5	31	29.7	25.2
3-Hydroxy-3-methyl butyric acid	Organic acids	-	-		86.6	61.9	62.9	37.5	45	44.8	29.8	22.3	31	79.1	98	95.3	26	37.9	46.2	16.8	31.4	24.9	100	99	49.5	34.7	35.9	25.6	19.9	21.7	12.6	55.6	55	63.1	35.7	29.8	35.1	25.4	29.2	23.5
L-Saccharopine	Amino acid derivatives	C00449	ko00300,ko00310,ko01100,ko01110,ko01130,ko01230		14.9	16.1	26.2	75.8	38.3	48.3	12.9	36.5	57.8	21.7	31	28.8	15.9	48.4	42.2	22.1	16.9	31.9	19.5	27.9	63.2	48.9	26.2	58.2	28.4	36.6	27.4	72.3	66.1	100	38.3	32.2	24.6	27.1	23.1	39.3
D-Erythronolactone	Organic acids	-	-		21.8	27.5	25.8	22.3	12.7	15.7	22.5	22.4	31.4	15.1	21.8	35	10	10.7	20.6	15.3	12.7	19.1	18.1	20.6	67.3	15	13	25	19.1	18.9	32.7	100	76.7	94.5	15.9	16.7	18.5	21.4	19.9	21.9
Cyanidin 3-O-rutinoside (Keracyanin)	Anthocyanins	C08620	ko00942		0	0	0	0	3.9	4.1	0	0	0	3.8	0	0	15.3	2.7	2.5	0	0	0	0	0	0	2.2	5.6	1.3	0	0	0	9.8	2.8	0	76	85.6	100	0	0	0
Chlorogenic acid methyl ester	Quinate and its derivatives	-	-		1.9	7.2	3	0.3	0.4	0.4	15.5	22.3	31.6	0.3	1.2	0.5	0.2	0.2	0.2	20.5	22.2	27.9	0.3	0.3	0.5	0.3	0.2	1	15.2	27.3	100	0.1	0.1	0.3	0.1	0.1	0.2	24.9	20.8	27.7
Neochlorogenic acid (5-O-Caffeoylquinic acid)	Quinate and its derivatives	C17147	-		70.6	80.8	62.5	62.9	62	58.7	74	100	67.5	49.6	50.7	41.4	65.7	60.6	58.1	80.1	77.2	73.9	46.3	58.7	19.7	56.8	51.9	29.1	78.9	76.3	76.3	31.5	30.7	53.3	20.5	18.1	22.8	72	59.2	70.6
Protocatechuic acid	Catechin derivatives	C00230	ko00362,ko00400,ko00623,ko00624,ko00627,ko01061,ko01100,ko01110,ko01120,ko01130,ko01220		15	21.2	19.5	93.2	97.8	74.8	20.3	18.8	18.1	12.7	9.8	13.1	100	52.2	43.2	26.7	24.1	15.7	11.7	7.7	8.6	47.8	83.7	64.1	19.4	24.1	26.2	0	0	0	76	90.5	87.4	19.1	16.4	24.8
Betaine	Alkaloids	C00719	ko00260,ko01100,ko02010		30.3	25.3	28	0	0	0	32.6	27.2	19	74.2	53	34.9	26.7	32.3	34.2	36.4	30.5	21.7	44.7	43.2	61.7	44.3	40.5	86	35.5	29.2	25.8	30.5	38.6	0	77.7	93.6	100	23.8	33.6	51.9
Succinic acid	Organic acids	C00042	ko00020,ko00190,ko00250,ko00350,ko00360,ko00361,ko00620,ko00630,ko00640,ko00650,ko00720,ko00760,ko00920,ko01060,ko01061,ko01062,ko01063,ko01064,ko01065,ko01066,ko01070,ko01100,ko01110,ko01120,ko01130,ko01200,ko01220,ko02020,ko04024,ko04727,ko04922,ko05230		43.2	39.6	62.7	42.9	53.2	84.1	38.4	43.2	71.3	41.4	50.5	45.1	25.4	25	25.5	52.2	52.7	52.9	49	55.7	36.4	27.1	43.1	51	50.1	43.8	46.1	30.6	27.2	33.8	29.4	29.2	32.7	61.7	100	84.1
D(+)-Glucose	Carbohydrates	C00031	ko00010,ko00030,ko00052,ko00500,ko00520,ko00521,ko00524,ko00901,ko01100,ko01110,ko01130,ko02010,ko02020,ko02060,ko04066,ko04068,ko04113,ko04152,ko04742,ko04910,ko04911,ko04917,ko04922,ko04930,ko04931,ko04932,ko04933,ko04973,ko04976,ko04978,ko05111,ko05230		37.2	32.8	36.6	20	21.6	17.8	37.9	40.7	42.1	18.4	34.2	26.6	14.7	20.1	16.1	34.2	46.4	37.5	30.9	28.1	93.7	13.7	13.2	28.8	27.8	42.6	55.8	100	77.4	95.3	16.1	17.8	18.1	24.8	27.5	34.2
Creatine	Organic acids	C00300	ko00260,ko00330,ko01100		13.7	11.2	12.7	3.5	3.9	5.3	24.6	31	28	5.9	12.2	14.5	3	4.2	4.1	17.4	37	42.5	14	14.5	17.2	4.2	3.1	2.2	55.3	32	41	14.7	13.5	18	4.1	2.7	5	84.1	86.2	100
L-Proline	Amino acids	C00148	ko00330,ko00332,ko00333,ko00401,ko00404,ko00970,ko01100,ko01110,ko01130,ko01230,ko02010,ko04974,ko04978,ko05230		29.5	30.8	38.7	21.6	21.1	18.2	31.4	23.9	33.5	18.5	21	28.8	15.4	18.4	25.2	26.7	32.1	36.1	39.5	33.8	88	18.8	24.6	29.7	22.9	37.6	40.8	87.8	100	64.1	4.8	10.3	13.7	28.8	22.2	29.5
D-Sorbitol	Alcohols and polyols	C00794	ko00051,ko00052,ko01100,ko02010,ko02060		100	92	78.5	61.2	62.4	57.5	56.5	61.6	55.7	77.1	72.6	68.4	78.7	68.8	73.2	42.7	42.9	38	80.3	74.6	67.8	74.4	70.8	75.3	50.3	52.7	33.4	98.8	78.9	88.7	72.6	76.7	68.8	40.8	39.2	47.7
Riboflavin	Vitamins	C00255	ko00740,ko01100,ko01110,ko04977		8.6	7.7	7.2	8.5	5.6	2.9	20.7	21.2	27.7	5	3.8	3.7	4.4	4.4	5.1	15.1	15.9	22.8	4.9	4.6	19.8	7.5	11.8	21.2	20.2	20	15.6	12	11.7	4.5	100	66.2	73.2	7.5	13.9	7.9
Suberic acid	Organic acids	C08278	-		72.1	50.1	43.6	40.7	46.1	41.5	33.6	60.2	66.7	84.8	88.6	87	28.7	38.2	55.8	64	52.3	71.8	63.7	86.7	49.3	41.2	44.4	64.8	50.7	66.4	75.6	81.3	62.9	100	52.3	87.5	58.3	68.8	90.5	29.5
L-Alanine	Amino acids	C00041	ko00250,ko00270,ko00430,ko00450,ko00473,ko00710,ko00970,ko01060,ko01100,ko01120,ko01200,ko01230,ko01502,ko02010,ko04122,ko04974,ko04978,ko05230		21.2	30.4	33.9	52.7	90.7	100	3.3	2.1	1.3	38.2	28.6	23.2	46.5	31.7	31.4	4.1	6.1	5.6	18.3	26.9	12.1	31.9	38.1	27.5	3.9	7.8	8.5	2.8	3.1	2.7	70.4	71.1	63.2	6.4	5.8	8
DL-Arabinose	Carbohydrates	-	-		66.7	39.5	50.6	14.9	17.8	19.7	33.7	19.6	47.8	50.8	46.6	48.7	22	32	34	28.2	37.5	24.6	56.9	44.8	72.6	43.6	29	52	30.4	21.1	49.7	100	74.5	85	28	33.6	44.6	24.9	28.9	29.2
serotonin	Tryptamine derivatives	C00780	ko00380,ko01063,ko01100,ko04024,ko04080,ko04540,ko04721,ko04726,ko04742,ko04750,ko04976,ko07211		6.9	100	63.2	10.6	0	0	0	0	0	4.4	11.9	8.4	4.5	10.4	10.2	0	0	0	5.8	8.5	48.8	18.6	12.8	37	0	0	0	45.7	39.9	76.4	55.8	66.7	61.6	0.3	0.6	0.6
L(-)-Malic acid	Organic acids	C00497	ko00650		76.4	74.8	77.5	30.6	30.8	38.1	78.2	91.1	98.4	44.5	52.7	66.1	60.3	64.2	51.4	82.9	90.2	88.6	46.6	45	90.2	56.7	48.1	41.6	76	78	100	91.9	90.2	93.5	33.5	30.1	35.4	29.5	48.5	42
Quinic acid	Quinate and its derivatives	C00296	ko00400		57.7	46.2	50	44.3	50.5	98.9	23.8	19.5	22.4	88	80.8	100	65.8	66.7	74	25.3	27.4	24.4	91.2	89.1	56.3	66.1	72.2	74.7	20	20.3	11.5	67	75.8	74	70.8	72.9	76.5	16.9	19.8	18.3
3-N-Methyl-L-histidine	Amino acid derivatives	-	-		22.2	13.9	20.5	80.2	100	77.8	0	0	0	16.4	34.2	16.3	61.9	72.9	58.7	0	0	0	16.4	19.2	22	60.6	63.1	59.2	0	0	0	14	28.9	35.2	89.7	69.9	61.6	0	0	0
Citric acid	Organic acids	C00158	ko00020,ko00250,ko00630,ko00720,ko01060,ko01061,ko01062,ko01063,ko01064,ko01065,ko01066,ko01070,ko01100,ko01110,ko01120,ko01130,ko01200,ko01210,ko01230,ko02020,ko04742,ko04922,ko05230		57.8	60.7	69.3	0	67.6	59.5	0	0	0	85.9	80.1	82.7	71.9	70.5	59.7	0	0	0	100	83	65.9	60.9	46.5	56.4	0	0	0	56.8	65.9	67.4	72.7	63.3	71.7	0	0	0
L-Tryptophan	Amino acids	C00078	ko00260,ko00380,ko00400,ko00404,ko00901,ko00966,ko00970,ko01060,ko01061,ko01063,ko01070,ko01100,ko01110,ko01130,ko01210,ko01230,ko04726,ko04974,ko04978,ko05143,ko05230		18	63.3	74.2	89.1	90.6	99.7	6.2	28.6	41.1	18	20.1	11.9	79.9	83.1	82	4	4.9	4.7	16.4	40.4	43	98.2	100	78.4	17.3	35.4	32.8	76.6	93	93.8	94.3	95.8	97.7	48.7	38	46.1
(+)-cis,trans-Abscisic acid (ABA)	Phytohormones	C06082	ko00906,ko01060,ko01062,ko01070,ko01100,ko01110,ko04075		11	4.8	3	0.3	0.4	0.4	7	8.9	7.2	7.8	13.6	32.5	0	0	0	4.4	5.1	4.8	31.6	29.8	100	0.2	0	0.7	4.7	3.7	18.4	68.4	58.9	62.3	1.4	1.2	1.3	16.5	15.9	11
N-[(-)-Jasmonoyl]-(L)-Isoleucine (JA-L-Ile)	Phytohormones	-	-		0	0	0	0	0	0	0	0	100	0	0	0	0	0	0	7.6	12.7	45.9	0	0	0	0	4.4	17.6	18.7	20.5	5.2	0	0	0	30.9	22.7	31.4	0	0	0
L-ascorbate	Vitamins	C00072	ko00053,ko00480,ko01100,ko01110,ko01120,ko02060,ko04066,ko04977		2.6	2.4	2.5	11.2	11.3	14.9	4.9	3.5	6.8	5.8	2.5	2.5	4.6	3.1	4	19.3	21.1	20.5	3.5	8.5	30.7	4.7	4.2	3.5	50.4	14.9	16.9	77.4	68.9	78.4	3.6	3.2	3.3	100	80.5	90
Histamine	Amino acid derivatives	C00388	ko00340,ko01065,ko01100,ko01110,ko04080,ko04664,ko04721,ko04750,ko04971,ko04974,ko05310,ko07227		20.3	37.2	41.1	38.4	65.3	70.7	2.4	2.2	1.8	22.2	34.5	25.1	74.6	82.3	98	1.8	2.4	1.7	28.1	24.5	5.5	100	80.5	65.5	1.5	2.8	1.1	2.7	2.3	3.1	95.3	62.6	81.5	0.6	1.8	1.8
(S)-(-)-2-Hydroxyisocaproic acid	Organic acids	-	-		0	15.7	24.4	100	67.6	64	0	0	9.9	0	11.8	9.6	34.1	32.6	57.7	7.1	8.9	8.7	0	13.8	12.9	38.6	63.4	19.5	7.5	11.2	0	8.2	0	21	17.4	20.1	21.1	12.9	14.2	8.4
DL-threitol	Alcohols and polyols	-	-		30.7	0	0	0	0	0	17.3	21.5	17.3	0	0	0	0	10.3	5.8	35.7	27.7	33.1	0	8.1	0	0	6.7	0	40.1	24.3	100	0	0	0	0	0	0	46.6	23.1	22.8
Fumaric acid	Organic acids	C00122	ko00020,ko00190,ko00220,ko00250,ko00350,ko00360,ko00620,ko00643,ko00650,ko00720,ko00760,ko01060,ko01061,ko01062,ko01063,ko01064,ko01065,ko01066,ko01070,ko01100,ko01110,ko01120,ko01130,ko01200,ko01220,ko02020,ko04922,ko05200,ko05211,ko05230		44.5	50.3	47	13.9	45.8	66.7	71	83.4	79.3	29	37.1	42.2	28.3	13	19.9	84.5	84.7	94.6	49.2	52.4	38.9	17.2	15.5	28.3	93	100	99.3	23.8	29.9	23.1	18.9	21.9	22	97.5	87.2	64.3
Dulcitol	Alcohols and polyols	C01697	ko00052,ko01100,ko02060		9.9	7.7	9.6	100	94.5	89.4	7.9	0	0	21.6	19.7	19.3	47.7	41.7	33.2	7.8	7.8	6.5	17.4	17.4	7.5	38.1	39	31.7	5.5	6.7	5.8	8.6	7	9.7	28.6	37.3	49.1	0	0	6.3
L-Gulonic-γ-lactone	Carbohydrates	C01040	ko00053,ko01100		49	63.7	56	26.9	48.1	33.3	44.9	38.5	26.2	44.6	73.4	64.2	23.1	43.2	52.6	34.8	39.3	21.7	82.1	70.9	92	47.9	44.6	54.1	35.5	34	26.1	89.2	78.8	100	22.5	33.5	45.2	28.9	35.2	29.3
D-Arabitol	Alcohols and polyols	C01904	ko00040,ko01100		0	0	0	84.8	58.1	51.3	0	0	0	0	0	0	81.7	79.6	90.6	0	0	0	0	0	0	100	79.1	58.6	0	0	0	0	0	0	47.7	64.4	59.7	0	0	0
Biotin	Vitamins	C00120	ko00780,ko01100,ko02010,ko04977		27.2	33.7	25.9	63.4	47.1	41.6	95.5	100	73.6	15.4	19.5	13.4	26.2	56.5	61.2	50.5	75.2	84.8	17.7	25.1	8.1	50.3	54.3	73.5	83.3	87.9	52.7	8.3	8	12.7	61.1	54.8	64.5	58.5	66.4	60.5
Guanosine monophosphate	Nucleotide and its derivates	-	ko00230,ko01060,ko01065,ko01100,ko01523,ko04022,ko04740,ko04742,ko04744		1.7	2.2	0	100	23.7	27.9	0	0	0	1.6	5.2	3.8	10.4	11.9	10	0	0	0	4.7	5.1	1.8	6.9	7.4	10.4	0	0	0	0	0	1.5	6.6	7.6	7.7	0	0	1.7
Putrescine	Phenolamides	C00134	ko00330,ko00480,ko00960,ko01060,ko01064,ko01100,ko01110,ko01130,ko02010,ko04974		15.4	13.9	14	22.2	10.7	10.6	10.6	7.3	8.1	8.4	8.5	9.4	100	16.3	13.3	5.4	8.4	5	6.1	4.9	13.1	11.6	4.6	2.1	7.6	7.5	13.9	3.3	2.1	2.8	6.3	5.5	4.7	15.6	17.2	16.7
Dodecanedioic aicd	Organic acids	-	-		77	77.8	59.9	0.1	52.1	52.4	51.9	48.3	44.3	72	70.7	63.6	59	50.3	60.9	66.1	80	45.9	100	62.4	87.4	56.1	62.8	53.8	80.7	52.2	54.2	66.8	66.3	69.7	73.9	47.5	60.4	64.5	62.4	39.9
Phenethylamine	Others	C05332	ko00360		12.5	8.5	0	8.6	0	8.9	8	10.8	12.7	0	0	0	0	7.9	8.8	5.2	5.7	8.2	5.4	10.3	8.6	8.8	0	0	16.6	35.3	37.1	11.8	0	12	0	0	0	86.2	100	95.4
A-Ketoglutaric acid	Organic acids	-	-		49.7	100	83.7	16.7	51.7	63.8	30.4	45	24.4	60	31.3	60.2	16	10.3	19.6	30.2	16.8	16.4	38.7	38.5	24.8	28.6	24.6	39.6	18.5	14.9	26.6	29.5	30.6	48.5	43.2	23.3	26.4	21.3	24.8	17.9
N-Acetyl-L-tyrosine	Amino acid derivatives	-	-		2.7	8.8	4.6	17.8	22.6	27.4	0	0	3.7	3.7	2.5	0	8.6	3.8	5.9	3.8	2.8	0	0	0	0	4.1	3.6	13.4	2.8	0	3.1	16.8	6.5	24.8	35.7	33.5	100	0	2.7	1.8
Diethanolamine	Others	C06772	ko00564		67.2	35.4	48.3	53.1	79.1	62.4	65.9	18.2	24.4	100	90.8	57.7	64.1	55.1	52.7	19.7	44.5	38.1	63.9	70.2	36.5	63.7	65	58.4	32.2	49.2	0	18	0	13.1	77.6	86.9	0	0	45.2	57
Luteolin 7-O-glucoside (Cynaroside)	Flavone	-	-		13.1	40.7	43.7	84.6	63.3	100	2.2	3	4.9	8.3	12	2.9	44	69.6	68.7	5	6.7	5.6	0	0	0	60.2	45.2	6.6	5.7	1.8	3.7	2.2	0	0	11.9	14.2	13.5	6.8	3.1	9.2
Protocatechuic aldehyde	Catechin derivatives	C16700	ko00950,ko01063		11.8	0	10.5	0	12.8	29.8	100	91.5	59.8	0	0	6.3	16.7	0	0	79.1	73	69.4	4.1	0	0	0	0	16.8	69.1	70.8	57	0	0	5.6	33.9	24	20.7	63.6	35.8	67.5
Kaempferol 3,7-dirhamnoside (Kaempferitrin)	Flavonol	C16981	-		0	7.7	1.6	50.6	68.8	100	0	0	0	4.6	4.4	1.1	32.5	40	34.7	0	0	0	0	0.2	0	22.6	13.4	1.5	0	0	0.3	0.4	0	0	1.5	1.4	1.2	0	0	0
L(+)-Ornithine	Amino acids	C00077	ko00220,ko00330,ko00472,ko00480,ko01060,ko01064,ko01100,ko01110,ko01130,ko01210,ko01230,ko02010		9.6	4.8	4.8	100	44.9	29.8	1.3	1.5	1.4	3.8	9.6	4.7	12.7	12	14	0	2.5	0	10.7	27.4	95.4	11.3	12.2	1.4	0.9	2	2.1	35.9	58.8	86.1	9.7	13.7	8.5	0	1.8	0.9
1,5-Anhydro-D-glucitol	Alcohols and polyols	C07326	-		45.7	23.6	25.4	0	0	0	14	29.5	22.4	27.9	34.3	40.7	0	29.3	20.7	33.8	30.7	31.3	22.4	28.9	74.3	0	36.2	25.5	42.6	49	44.9	100	77.2	61.8	34.6	32.3	47.5	52.1	55.3	32.1
Cis-Aconitic acid	Organic acids	C00417	ko00020,ko00630,ko00660,ko00720,ko01060,ko01061,ko01062,ko01063,ko01064,ko01065,ko01066,ko01070,ko01100,ko01110,ko01120,ko01130,ko01210		32	35.5	27.7	3	4.4	4.3	51.7	59.3	45.3	8.5	9.5	11.8	1.6	0	1.8	100	86.2	71.1	12.8	8.9	3.7	2	2.7	2.2	89.4	59.3	34.6	6.1	4.7	4.2	0.9	0.8	0.6	57.9	29.5	46
Adenosine 5'-monophosphate	Nucleotide and its derivates	C00020	ko00230,ko00908,ko01060,ko01065,ko01070,ko01100,ko01110,ko01130,ko01523,ko04022,ko04024,ko04068,ko04150,ko04151,ko04152,ko04211,ko04740,ko04742,ko04923,ko04924,ko04925,ko05012,ko05032		3.9	3.1	1.9	100	23.3	30	1.4	1.4	1.5	1.5	5.8	3.6	7	10.4	7.1	1.2	1.4	0.7	3.2	6	3.5	6.3	6.2	5.1	1.1	1.1	2.1	1.4	1.5	2.5	2.5	2.6	2.6	2.9	4	2.7
N-Acetylaspartate	Amino acid derivatives	C01042	ko00250,ko01100		19.5	19.1	23.4	0	0	0	62.1	65.5	74.7	16.8	13.6	14.7	0	0	0	100	62.1	78.2	21	22	25.7	8.9	0	0	90.2	89.7	62.1	0	0	9.9	0	0	0	73	77.6	87.9
(5-L-Glutamyl)-L-amino acid	Amino acid derivatives	C03740	ko00480		62.8	50.6	46.4	19.3	95.6	67.5	31.4	13.5	21.6	35.3	48.3	36.7	76.7	55.3	68.9	14.4	21.7	30.8	43.9	41.9	30	85	79.7	99.4	20.3	39.2	10.6	25.7	24.9	24.8	82.8	100	82.5	21.3	51.9	48.6
Oxoadipic acid	Organic acids	C00322	ko00300,ko00310,ko00380,ko00680,ko01100,ko01120,ko01130,ko01210,ko01230		19.5	71.4	19.1	46.4	0	37.2	0	0	0	21.9	12	21.3	24.2	10.3	0	0	0	0	8.8	9	77.5	9	13.6	16.3	0	0	0	100	71.7	71.1	19.5	0	19.5	0	0	0
4-Pyridoxic acid	Pyridine derivatives	C00847	ko00750,ko01100,ko01120		23.5	14.1	16.6	1.4	1.1	2	26.6	34.2	36	14.5	18.2	21.4	2.1	2.9	2.3	54.2	65.1	54.5	21	21.6	20.7	2.6	3.3	11.8	75.2	75.4	60.1	10.4	11	17	17.7	16.7	19.6	55.4	74.7	100
5-Hydroxyindole-3-acetic acid	Indole derivatives	C05635	ko00380,ko01100,ko04726		77.6	59.8	100	9.9	6.9	10.6	0.8	0.8	0.7	81.1	37.8	65.7	4.9	5	5.9	1.1	0.7	0.5	75.2	76	83.1	10.7	9.3	9.3	0.9	0.8	1.2	48	53.5	46.9	10	9.6	5.4	0.5	0.8	0.6
Methionine sulfoxide	Amino acid derivatives	-	-		87.8	89	90.3	65.4	63.4	67.3	64.8	63.9	58.3	87.6	100	85.8	79.5	66.3	73.1	50.1	52.7	47.9	73.9	80.9	69	80.6	66.9	80.6	49.2	44.5	22.7	58.3	57.8	56	55	71.4	74.9	48.5	34.7	39.7
Dl-Norvaline	Amino acids	C01826	-		44.2	52.9	59.1	71.5	97.3	100	18.6	18.9	21.2	36.2	44.4	39.2	50.4	54.1	43.9	7.3	12.1	9.1	30.3	65.3	20.1	50.1	43.9	38.7	19.4	42.7	18.7	40	36.2	44.9	57.6	50.6	47.1	28.3	25.3	26.8
NADP	Others	C00006	ko00195,ko00480,ko00760,ko01100,ko04918,ko04925		4.7	7.9	6.1	100	14.3	13	9.5	8.9	8.7	5	4.8	4.4	12.6	22.9	17.4	4.8	5.5	4.6	4.2	5.1	48.6	15.4	18.3	11.4	5	5.1	6.1	37.9	39.9	29.6	14.6	9.8	8.9	7.9	11.5	8.8
Vitamin D3	Vitamins	C05443	ko00100,ko01100,ko04977,ko05323		22.9	52.4	42.9	0	64	70.5	4.1	3.1	3.5	30.8	37.1	7.7	73.6	43.7	100	2.3	3.5	2.8	7.9	10.2	1.2	0	0	0	1.9	2	6.8	5.5	1.4	0	59.3	56.3	48.7	1.9	1.5	2.2
4-Hydroxybenzaldehyde	Benzoic acid derivatives	C00633	ko00363,ko00623,ko00627,ko01061,ko01100,ko01120		48.3	40.9	47.4	43.2	60	71.4	31.9	38.5	43	33.7	29	24.7	68	64.6	52.9	39.9	46.5	66.3	26.1	18	32.9	56.2	72.6	83.4	64	59.4	66.3	12.9	19	19.1	88	100	94.9	57.7	78.3	51.5
N-Acetylputrescine	Phenolamides	C02714	ko00330,ko01100		7.5	5.7	6.8	25	29.9	28.4	2.8	3.7	3.1	5.9	4.5	3.5	48	41.4	50	0	3.5	3.3	1.7	3.5	2.3	51.5	53.9	6.9	3.3	2.1	0	6.8	0	9.1	20.4	24.8	100	2.3	3.7	7.1
4-Acetamidobutyric acid	Organic acids	C02946	ko00330,ko01100		29.9	19.8	31.3	0	0	12.3	22.8	21.3	30.3	6.9	14.2	19	5.9	6.9	6.8	8.9	36.2	40.1	37.3	13.9	10.3	9	5.1	4	100	29	7.9	18.2	24.4	19.2	9.2	9.8	21.2	32	48.8	47.4
Indole-3-carboxaldehyde	Indole derivatives	C08493	-		6.7	5.9	6.4	6.3	8.2	7.4	8.3	24.2	47.6	3.6	4.9	3.7	5.1	4.5	3.2	12.5	13.8	14.3	4	2.6	3.1	4.8	14.7	35	21.7	47.1	17.1	0	0	2.4	100	97.2	79.7	36	35.4	26.6
S-(5'-Adenosyl)-L-methionine	Amino acid derivatives	C00019	ko00261,ko00270,ko00330,ko00908,ko01060,ko01070,ko01100,ko01110,ko01130,ko01230,ko04122		5.3	4.3	3.4	100	9.8	6.6	1	0.6	0.3	1.4	2.3	2.2	4.4	4	3.5	0.2	0.4	0.2	4.2	5.2	9.6	3.2	2.4	0.8	0.5	0.8	3.1	5.4	4.7	7.3	1.4	1.2	1.8	0.9	1.7	1.6
Flavin adenine dinucleotide (FAD)	Nucleotide and its derivates	C00016	ko00740,ko01100,ko01110,ko04977		53.2	64	51.6	0	0	100	51.4	45.9	31.5	10.5	21	7.7	66.9	76.1	75.5	18.5	31.8	19.4	24.8	9.1	38.1	63.5	56.8	16.1	11.1	10.6	40.1	30	41	64	21.5	21.5	9.6	24.5	22.7	31.3
N-Acetyl-D-glucosamine	Carbohydrates	C00140	ko00520,ko01100,ko02010,ko02060		100	86.3	81.6	65.5	56.8	56.8	58.5	65	65.2	97.4	62.1	86.3	72.6	69.7	61.4	42.5	54	51.9	87.2	73.1	73.5	63.6	66.2	55.6	48.5	55.4	35	76.6	75.2	74.9	74.7	62.7	82.9	39.6	40.5	46.3
4-Hydroxy-L-glutamic acid	Amino acid derivatives	C03079	-		22.2	19.4	17.9	70	69.7	100	11.7	12.8	15.1	31.6	32.9	21.6	32.7	34.7	36.9	12.7	12.1	9.3	35.4	25.1	20.8	34.1	26.4	21.2	9.6	16.5	16.5	12.2	18.1	20.6	26.7	25.3	16.7	12.6	12.8	7.8
2'-Deoxyinosine	Nucleotide and its derivates	C05512	ko00230,ko01100		27.4	0	0	100	65.1	31.1	18.3	11.6	19.3	12.1	22	14.2	37.2	31.6	33.5	22.1	49.3	18	22.1	26.1	32	26.5	32.7	17.7	21.9	31.2	26	18	0	0	58.3	53.1	48.4	22.5	29	27
N-Acetyl-5-hydroxytryptamine	Tryptamine derivatives	C00978	ko00380,ko01100		26	35.2	28.8	100	0	0	0	0	0	17.2	14.1	10.1	33.2	32.9	24.4	0	0	4.2	13	12.4	16.6	29.2	24	14.4	0	0	12	15.4	18	11.9	17.2	18.2	12.5	10.8	6.1	8.2
6-Hydroxymelatonin	Tryptamine derivatives	C05643	ko00380		0	0	0	0	0	0	0	28.4	45	0	0	0	0	0	0	26.4	32.4	59.5	0	0	0	0	0	10.9	76.5	91.7	38.3	0	0	0	6.3	11.1	9.1	87.2	100	77.7
4-Nitrophenol	Others	C00870	ko00627,ko01120		8.6	11.9	7.3	36.7	10.6	5.8	74.6	69.3	59	14.6	14.3	10.7	10.4	14.3	14.2	80.2	82.8	92	9.6	10.8	60.1	12.3	11.7	14.3	93.3	90.4	97.8	64.2	61	54.8	33.2	34.5	37.7	94.9	100	96
O-Phosphorylethanolamine	Others	-	ko00564,ko00600,ko01100,ko01503,ko04071		42.6	59	35.9	100	69.6	60.7	12.9	18.2	5.1	20.2	23.8	18.8	51	78	91.1	4.9	1.9	0	28.6	17.3	6	62.5	66.7	76.8	1.6	1.8	0	0	3.1	2.4	40.2	31	37.9	8.9	9.3	11.4
L-Homocystine	Amino acids	C01817	ko00270		7	0	0	52.9	46.5	26.1	0	0	0	0	23.6	19.2	76.4	100	52.1	0	0	0	17.6	15.5	23	50.9	41	53.7	0	0	0	0	16.1	6.5	36.2	28.3	27.3	0	0	5.4
Dihydromyricetin	Flavonol	C02906	ko00941,ko01110		78.3	52.9	63.5	29.9	26.4	38.1	52.5	42.1	48.4	46	43.1	42.5	23.8	22.2	25.5	64	49.9	47.9	45.1	38.3	76.9	24.1	0	11.2	45.2	39.8	89.1	61.2	86.8	63.4	0	0	0	100	74.1	82.6
1-O-Caffeoyl quinic acid	Quinate and its derivatives	-	-		74.8	86.9	68.6	64.8	64.5	58.3	71.8	71	81.5	48	51.1	39.6	64.8	56.6	58.1	80.6	88.9	92.7	45.1	54.3	20.6	53.7	46.9	29	85	90.7	93.6	29.4	26.6	49.6	17	16.1	19.7	82.1	55.8	100
4-Hydroxybenzoic acid	Organic acids	C00156	ko00130,ko00360,ko00362,ko00363,ko00623,ko00627,ko00790,ko01061,ko01100,ko01110,ko01120,ko01220,ko07110		12.5	13.4	19.1	18.1	18.4	14.1	0	0	0	16.5	21.3	21.8	11.9	13.8	12.7	8.5	10.5	9.8	25.6	32.9	0	17.6	19.2	30.5	8.4	9.6	6.3	0	0	0	96.9	100	97.7	6.4	10.5	9.6
3-Hydroxy-3-methylpentane-1,5-dioic acid	Amino acid derivatives	C03761	-		5.4	3.2	3.6	0.8	0.9	1.2	7.7	8.2	9.5	3.7	6.7	7.2	2.2	2.4	2.4	18.5	21.3	21.2	9	12.1	10.9	2	2.4	4.5	22.2	18.8	38	100	37	96.7	4.4	3.8	5.8	50.6	36.9	40
Hesperetin 7-rutinoside (Hesperidin)	Flavanone	C09755	-		3.3	12.3	6.5	100	50.7	30.9	3.2	2.7	1.1	1.8	1.2	0.3	35.8	31.6	32.6	6.3	2	1.1	0.1	0.2	0	27.8	21.6	1.5	1.3	0.9	1	0.4	0	0.1	13.6	9.6	9	3.7	1	3.7
Naringenin chalcone	Flavanone	C06561	ko00941,ko01061,ko01100,ko01110		0	5.3	0	15.3	14.7	9.5	0	0	0	0	0	0	0	0	0	0	0	0	0	0	0	2.9	19.1	93.8	0	0	0	7.6	0	0	99	94.7	100	0	0	0
Aromadedrin (Dihydrokaempferol)	Flavonol	C00974	ko00941,ko01061,ko01100,ko01110		2.2	9.8	7.5	52.6	45	34.8	0	0	0	2.8	0	0	55	20.9	16.4	0	0	0	0	0	0	19.7	80.5	62.6	0	0	0	0	0	0	78.5	79.8	100	1.3	3.1	1.1
Icariin (kaempferol 3,7-O-diglucoside 8-prenyl derivative)	Flavonol	C17555	-		16.8	24.5	36.3	6.2	44.4	62.1	12.4	13.8	16.5	10.4	11.5	6.1	100	85	87.5	18.8	25.2	19.6	4.2	5.7	1.6	90.8	84.2	25.2	25.3	29.9	0	0	0	0	11.6	12.9	8.9	30.7	29.2	32.3
Pinocembrin (Dihydrochrysin)	Flavanone	C09827	ko00941		25.9	17.9	28.3	3.3	3.2	5	46.1	33.2	57.3	23.3	30	28	3.7	2.8	3.3	98	100	85.7	38.9	26.8	12.2	4.3	2.8	0.4	72.8	83.7	53.6	4	0.4	3.4	3.5	4.3	6.1	61.2	75.9	73.2
Isosakuranetin-7-neohesperidoside (Poncirin)	Flavanone	C09830	-		4.3	23	28.5	52.3	41.7	53.8	11.2	56.6	11.7	5	7	4.3	16	53.8	53.4	100	48.1	37.1	0	0	1.4	49.8	33.2	0	21.3	19	0	7	0	4.4	42.3	20.2	30.8	40.3	15.1	41.9
3,4-Dihydrocoumarin	Coumarins	C02274	ko00624,ko01120		20.3	29.9	21.4	100	58.5	29.3	15.5	16.5	11.3	7.3	5.4	1.9	44.9	39.9	32.7	15.5	12.8	7.6	1.8	1.5	0.7	39.4	35	54.8	15.7	7.5	3	0	0.5	0	14.7	15.4	14.5	17.7	11	14.5
Scopoletin (7-Hydroxy-5-methoxycoumarin)	Coumarins	C01752	ko00940,ko01061,ko01110		15.1	36	30.7	100	85.5	97.7	0	0	0	6.2	7.2	0	37.6	43.2	44.9	0	0	0	0	0	0	35	25.5	13.6	0	0	0	0	0	0	21.4	20.6	18.8	0	0	0
4-Hydroxycoumarin	Coumarins	C20414	-		37.9	28.9	64.4	96.8	83	60.6	0	0	0	37.2	27.9	10.8	100	88	93.1	0	0	0	0	0	0	93.7	77.3	59.6	0	0	0	0	0	0	85.2	86.8	82.6	0	0	0
Uridine 5’-diphosphate	Nucleotide and its derivates	C00015	ko00240,ko00908,ko01100,ko04080		4.9	7	7.5	100	11.6	20.9	4.5	4	4	7.3	8.7	6.2	9.7	15.8	15.7	2.2	2.5	1.7	4.4	6.4	13.2	15.5	9.3	4.1	7.7	1.8	1.5	6.4	4.4	7.8	10.2	6.4	4	1.9	1.7	3.2
trans-Citridic acid	Organic acids	-	-		0	0	0	0	0	0	27.7	23.4	17.3	0	3.7	2.4	0	0	0	32.5	28.8	65	0	0	19.8	0	0	0	48.7	100	76	22	23.2	21.8	10.8	13.1	12.2	63.8	73.6	59.7
γ-aminobutyric acid	Organic acids	C00334	ko00250,ko00330,ko00410,ko00650,ko00760,ko01100,ko01120,ko02024,ko04024,ko04080,ko04721,ko04723,ko04727,ko04742,ko04915,ko05032,ko05033		2.4	4.8	5.4	61.6	77.4	100	0.4	0.5	0.9	7.1	24.8	19.3	65.2	68.9	68.3	6.5	20.1	15.1	14.5	21.8	19.6	53.4	55.8	52.8	14.6	17.6	13.2	0.6	0.4	0.7	48.7	52.6	49.8	6	8	10.1
2-Aminoisobutyric acid	Amino acid derivatives	C03665	-		72.1	96.6	93.9	90.3	98.9	100	48	45.8	45.3	58.9	61.9	60.5	82.8	92.9	95.7	35.3	40.1	42.1	46.7	51.9	70.1	98.6	95.7	73.6	36.9	38.3	39.6	58.7	61.7	62.3	86.4	95.2	83.1	33.5	43.6	39.6
N,N-Dimethylglycine	Amino acid derivatives	C01026	ko00260,ko01100		6.5	10.6	11.4	68.8	86.1	100	3.6	3.3	4.1	10.3	25.8	22.8	66.1	70.4	74.8	8.6	21.4	17.9	14.8	25	22.4	55.2	61.6	52.8	16	18.7	15.7	3.9	4	4.5	57.6	63.7	62.1	6.7	9.9	12.5
ethylmalonate	Organic acids	-	-		47	26.5	21.1	3.5	5.5	4.9	18	14	12.1	28.7	46.7	49.2	4.7	4.7	5.3	9.1	15	13.4	66.7	100	8.1	4	4.6	3.4	13.8	15.7	8.7	20.5	24	37.8	4.2	4.1	4	15.6	15.1	12.1
5-oxoproline	Amino acid derivatives	C01879	ko00480		33.9	34.5	48	52.8	87.9	100	8.4	10.1	14.7	23	23.6	27.1	37.3	31.4	33.9	8.7	7.5	21.4	19.7	56.8	15.3	41.8	35	33.9	8.8	11.8	19.9	6	12.1	24	30.2	61.3	55.6	6.6	29.9	22.6
GIBBERELLIN A9	Phytohormones	C11863	ko00904,ko01100,ko01110		18.1	30.8	0.1	0.1	0.1	0.1	0.1	38.1	52.9	25.3	29	34.9	22.1	0.1	23.7	0.1	0.1	0.1	31.3	32.6	0.1	0.1	0.1	0.1	0.1	100	73.3	13.1	0.1	13.3	48.1	41.2	38.5	0.1	0.1	0.1
Taurocholic acid	Organic acids	C05122	ko00120,ko00121,ko00430,ko01100,ko04976		84.3	74.9	84.1	69.7	71.4	65.6	60.1	65.8	75.2	76.2	77.2	78.7	84.1	72	79.3	83.1	72.9	75.6	82.3	77.9	81	82.7	76.4	80.4	73.1	74.7	74.9	84.6	81	82.9	85.4	73.7	62.6	84.8	80.4	100
4-(Aminomethyl)-5-(hydroxymethyl)-2-methylpyridin-3-ol	Others	C00534	ko00750,ko01100,ko01120,ko04977		30.4	42.8	45.1	100	85.3	93.3	2	0	0	23.8	37.7	33.3	43.4	73.7	53	0	0	0	22.6	29.4	14.5	48.2	27.5	13.7	0	0	0	12.1	15.3	29.9	21.6	21.6	19.7	0	0	0
2-(Formylamino)benzoic acid	Organic acids	-	-		58.2	43	29	69.8	51.8	64.6	29.7	0	26.4	59.5	0	0	21.1	32.6	29	63.7	45.4	48.2	0	34.5	65.2	0	0	30.5	45.1	38.7	50	62.5	59.8	54.3	62.8	76.2	100	0	62.2	35.1
Aminomalonic acid	Organic acids	C00872	-		46	44.3	66.3	45.8	53.3	82.7	43.8	45.8	70.9	43.2	59.4	56.6	25.9	29.8	38.5	59.6	58.5	55.9	52.5	67	36.9	33	35.9	57.4	50.7	45.8	55.7	32.6	30.7	35.2	32.8	26.6	39.1	67.6	100	93.1
1-Methyladenine	Nucleotide and its derivates	C02216	-		39.3	23.2	15.1	86.8	100	82	0	0	0	36	63.3	49.8	42.7	30.4	29.2	0	0	0	33.6	39.8	0	36.7	19.9	28.3	0	0	0	20.3	33.5	25.6	33.9	27.2	0	0	6.3	14.5
Sinapyl alcohol	Hydroxycinnamoyl derivatives	C02325	ko00940,ko01061,ko01100,ko01110		0	7.2	0	5.2	6.9	5.9	0	0	0	100	51.8	72.3	0	0	0	0	0	0	78.5	99.5	10.7	0	0	0	0	0	0	9.6	4.8	6.2	0	0	0	0	0	0
Quercetin 4'-O-glucoside (Spiraeoside)	Flavonol	-	-		7.9	32.3	20	100	73.6	65.3	15.5	11.3	8.5	5.5	5	0.6	72.2	68.9	58	15.6	5.9	4.7	0.2	0.6	0.2	57	50.4	28.7	4.7	3.6	3.1	0.9	0.2	0.6	11.6	12.8	15.4	16.8	4.1	20.9
6,7-Dimethoxy-4-methylcoumarin	Coumarins	-	-		11.2	17.3	10.1	0	0	3.5	49.2	47.7	66.4	0	5.2	0	0	2.7	0	14.8	100	97.7	0	0	0	0	3.8	0	52	56.9	0	0	0	0	0	0	0	39	57.3	61.9
6-Hydroxy-4-methylcoumarin	Coumarins	-	-		6.8	13.5	17.6	100	44.3	39.2	4.8	4.2	4.3	7.8	9	2.1	35	37.7	27.8	0	7.2	7.3	0	0	0	37.9	31	22.9	9.1	8.8	10	0	0	0	0	33.5	40.9	14	10.7	12.3
(Rs)-Mevalonic acid	Organic acids	-	-		33.8	33.6	28.8	58.6	33.4	68	19.5	37.4	78.8	9.7	9.9	27.3	23.1	13.8	19.9	70.9	38.1	64.4	16.2	0	26	10.7	0	0	40.6	28.3	100	28.9	27.7	28.7	0	0	0	0	20.1	20
D-Glucose 6-phosphate	Carbohydrates	C00092	ko00500,ko00521,ko00524,ko00562,ko01062,ko01100,ko01130,ko02020,ko02060,ko04911,ko04917,ko04918,ko04931,ko04973,ko05111,ko05230		42	43.2	57.8	100	56.1	62.1	19.3	16.5	12.1	35.5	75.7	42.5	31.4	55.8	61.3	22.6	22.4	9.1	72.8	45.2	33.6	44.5	39.2	49.3	6.1	12.9	16.3	26.4	25.1	52.2	40.7	45.8	48.8	22.9	16.6	23.6
D-Sedoheptuiose 7-phosphate	Carbohydrates	-	-		27.9	41.3	41.8	14.6	15.3	13.3	52.6	44.2	32.2	45.4	39.7	59.4	47.4	39.7	53.8	30.5	33.4	24.5	41.3	38.2	51.2	30.5	38.2	100	47.4	60.1	36.3	71.4	63.7	49.8	72.4	52.4	35.3	76	90.9	64.4
Cytidine 5'-monophosphate (Cytidylic acid)	Nucleotide and its derivates	C00055	ko00240,ko01100		11.2	7.6	0	100	41.2	61	0	0	0	18.6	57.1	37	32.8	49.4	40.9	0	2.6	0	18	28.1	0	45.1	26.5	50.3	0	0	0	0	4.7	0	35.4	30	22.1	0	4.1	0
2'-Deoxyadenosine-5'-monophosphate	Nucleotide and its derivates	C00360	ko00230,ko01100		37.8	27.3	38.3	46.6	23.9	22.8	72.2	84.3	84.9	19.3	19.4	32.4	30.9	30.7	31.5	96.2	77.2	86.2	30	26.4	41.8	43.9	26.1	21.8	74.1	88.3	100	9.6	7.6	16.5	23.9	18.6	22.3	83.5	94.3	82.7
Dl-Glyceraldehyde3-phosphate	Others	-	-		7.7	8	9.6	53.8	0	0	7	8.8	0	27.8	45.1	38.3	29.4	100	88.3	22.2	15.2	9.2	37.3	28.8	68	44.4	46.6	41.7	10	7.8	0	37.5	31.5	45.5	57.5	54.1	82.7	0	10.2	13.2
Uridine 5'-monophosphate	Nucleotide and its derivates	C00105	ko00240,ko01100		6.5	5.8	4.8	100	70.7	95.4	3.6	2.4	3.7	5.6	23.2	12.1	27	32.6	20.2	1.6	2.1	1	11.3	16.6	5.4	17.3	14.5	26.2	2.5	2.1	5.2	2.2	2.6	3.1	19.1	20.9	23	6.2	8.9	7.3
trans,trans-Muconic acid	Organic acids	-	-		67.1	61.1	67.1	48.1	80.6	81.5	26.9	23.4	81	76.9	88	83.3	76.9	83.8	87.5	84.3	84.7	70.8	72.2	100	94	97.7	80.6	78.2	88.9	85.6	91.2	64.4	68.1	84.3	58.8	83.8	91.7	54.2	81	67.6
Glycitin	Isoflavone	C16195	ko00943		0	6	14.3	10.8	11.1	22.7	0	6.5	7.8	0	0	0	8.5	22.8	23.5	5.3	6.5	4.8	0	0	5.3	28.8	24.8	16.1	7.7	5.3	12	7.3	6.9	7.2	79.8	100	86.7	5.2	7	10.3
Quercetin 3-O-glucoside (Isotrifoliin)	Flavonol	C05623	ko00944,ko01100,ko01110		34.6	67.9	56	100	88.3	84.6	35.7	39	27.5	30.7	20.6	4.3	88.9	94.8	91.2	50.6	29.1	23.3	1.2	2.5	0.5	91	85.6	70.4	15.9	17.3	21.4	5.4	0.7	2.4	46.5	41.5	44.2	43.4	19.7	55.3
Vitexin 2''-O-beta-L-rhamnoside	Flavone C-glycosides	C12628	ko00944		2.2	7	4.6	29.3	41.8	100	0	0	0	0	0	0	34.6	24.6	26.3	0	0	0	0	0	0	25.5	15.3	39.1	0	0	0	0	0	0	11.3	12.9	16.3	0	0	0
Liquiritigenin	Flavanone	C09762	ko00941,ko00943,ko01061,ko01110		71.1	42.4	42.6	0	0	0	41.7	71.3	100	0	0	19	0	0	0	53.9	69.8	93.1	27.9	12.7	0	0	0	0	71.3	67.7	26.7	0	0	0	0	0	0	92.4	77.6	47.8
Coniferin	Hydroxycinnamoyl derivatives	C00761	ko00940		17.6	51.6	16.5	20.4	32.5	18	95.2	93.1	65.3	3.4	5.1	1.8	21.9	23.2	18.9	57.9	73.7	81.6	4.4	6.5	3.1	28.9	16.3	6.4	100	94.6	73.1	2.3	1.4	3.5	18.2	14.7	10.8	80.1	61.6	76.3
Kaempferol 3-O-galactoside (Trifolin)	Flavonol	C12626	ko00944		28	41.3	35.5	100	94.9	74.9	9.5	17.9	21.6	26.4	21.9	10.1	39.7	71.3	62.3	31.6	17.3	20.4	5.5	12.2	0.9	61.6	61.5	29.7	10.4	21.5	12.6	13.2	2.2	6.7	54.1	54.9	59.7	32.5	29.7	28.9
2'-Hydroxygenistein	Isoflavone	C12134	ko00943		5.9	19.8	6.5	49.9	17.1	10.8	35.4	35.9	44	1.7	4.7	0.7	22.1	20.9	12.9	100	55.8	67	0	0	0	20.6	13.5	2.7	59.8	68.1	20.6	0	0	0	7	5.3	4.2	60.3	42.1	68.1
Afzelechin (3,5,7,4'-Tetrahydroxyflavan)	Flavanone	C09320	ko00941,ko01110		8.3	21.9	11.4	100	95.8	68.2	0	0	0	4.2	0	0	28.4	23.2	0	0	0	0	0	0	0	19.1	15.6	16.2	0	0	0	0	0	0	5.2	5.6	5.4	0	0	0
Kaempferol 3-O-rhamnoside (Kaempferin)	Flavonol	C16911	ko00944		16.4	25.9	21.5	29.9	31.8	27.8	39.9	38.8	50.7	9	15.2	3.9	24.7	19.5	15	100	61.2	63.3	2	2.7	0.8	14.8	14.5	9.7	52.8	71.1	41.2	0.3	0.3	0.9	14.6	8.7	9.9	45.1	44.6	36.2
Tricetin	Flavone	C10192	ko00941		0	6	0	0	0	0	26.4	27.9	32.7	0	0	0	0	0	0	18.1	33.1	26.4	0	0	0	0	0	0	25.8	20.2	11.5	0	0	0	0	0	0	56.3	25.4	100
2-Methylglutaric acid	Organic acids	-	-		89.5	62	50	57.1	44.6	36.6	17.6	13.4	20.4	70.5	83.7	92.8	34.5	34.8	48.7	10.9	15.9	12.9	100	94.6	24	37.2	46	67.6	10.8	8.7	8.4	46.8	55.9	83	51.3	57	51.8	9.9	13.5	7.2
D-Fructose 6-phosphate	Carbohydrates	C00085	ko00052,ko00500,ko00680,ko00710,ko01100,ko01120,ko01200,ko04152,ko04922,ko04931,ko05230		39.2	42.3	42.3	93.4	38.7	56.9	23.8	19.1	24	42.1	100	53.5	35.1	75.3	70.1	21.2	29	10.3	71.6	65.4	75.1	46.9	34	30.3	10.1	11	20.2	34.8	41.1	41.9	22.3	28.5	31.9	33.4	49.5	27.6
1,4-dihydro-1-Methyl-4-oxo-3-pyridinecarboxamide	Pyridine derivatives	-	-		0	0	26.3	100	84.2	57.9	42.5	47.4	28.9	37.9	35.1	59.9	81.8	56.7	50.2	47.8	56.3	40.9	57.9	76.1	42.5	55.5	49	98.4	0	49.8	36.4	26.2	0	0	45.3	36.8	71.7	0	49	47.8
N6-Succinyl Adenosine	Nucleotide and its derivates	-	-		0.8	0.7	0.9	100	30.4	29.6	0.8	1	0.9	0.7	0.8	0.5	11.7	5.6	7.8	1.4	2.5	2.3	0.6	0.8	1.3	12.2	13.1	10.7	2.3	2.1	1	2.4	3.1	3.4	11.6	9	6.6	1.6	1.7	1.9
Allysine(6-Oxo DL-Norleucine)	Amino acid derivatives	C04076	ko00300,ko00310,ko00960,ko01060,ko01064,ko01100,ko01110,ko01130,ko01230		67.6	54.9	63.6	42.2	42.1	50.8	91.1	100	98.4	25.6	37.2	35.2	25.1	15.1	17.6	82.1	69.4	92.7	38.4	30.5	25	23.7	14.1	35.4	70.4	87	83.7	11.8	14.6	14.4	19.7	19.3	18	60.2	95.1	75.4
6-MethylCoumarin	Coumarins	-	-		18.5	29.6	15.8	100	49.1	29.1	8.9	8.9	7	5.2	4	0	22.8	31.7	34.5	0	0	0	0	1.5	0	27.1	26.9	27.4	0	0	0	0	0	0	20.8	22.2	18.1	0	0	0
Aminophylline	Alkaloids	-	-		29.8	44.7	65.9	60.9	98.9	100	0	0	34.2	41.1	42.5	37.6	66.2	70.6	67.6	42.2	0	43.2	43.7	40.6	0	80.5	55.6	27.4	29.4	23	95	37.9	48.9	50.5	41.7	40.9	44.7	79.6	51.8	42.9
N-Acetylthreonine	Amino acid derivatives	-	-		36.1	26.4	42.3	19.8	55.1	68.7	45.8	34.2	35.1	24.6	33.2	30.7	39.6	82.7	96.3	49.1	57	54.2	41.1	35.2	25.7	86.4	87.9	100	91.6	67.3	63.1	31	34.1	39.8	91.1	76.6	85.5	86.9	67.3	76.6
H-HomoArg-OH	Amino acid derivatives	C01924	-		19.1	17.9	26.3	100	57.1	78.9	2.3	2	3	16	23.1	20.2	36.3	33.9	32.5	0	2.1	1.9	32.3	46.7	81.6	36.8	24.5	6.7	0	2.5	1.4	41.6	64.9	71.3	21.7	30.4	23.8	0	5.5	3.8
Petunidin 3-O-glucoside	Anthocyanins	C12139	ko00942		64.5	42.5	26.5	14.6	9.4	9.3	55.9	62.9	78.8	42.5	49.9	46.3	32.4	23.3	21.3	56.6	56.4	71.9	38	46.7	21.4	38.6	41.6	58.8	64	100	54.5	35.4	28.2	32	48.4	44.7	46.2	50.5	61.2	79
Pelargonidin 3-O-beta-D-glucoside（Callistephin chloride)	Anthocyanins	-	-		29	40.6	37.4	55.7	72.4	91.1	16.2	22.3	20	14.8	32.7	25.9	50.3	88.5	83.6	23.2	38.4	23.5	23.2	27.1	9	100	64	21.4	39.6	55	18.9	25.4	21	29.1	50	36.2	63.1	20.5	37.2	36.1
Fustin	Flavonol	C01378	ko00941		3.6	20.4	11.2	55.5	66.7	100	0	0	2.5	7.9	5	3.9	64.4	42.5	15.5	0	5.8	5.8	0	0	0	47.7	38.1	12.7	4.6	0	0	6.9	0	0	16.9	23.3	40.6	11.8	11.9	12.7
Sissotrin	Isoflavone	C05376	ko00943		0	0	0	7.3	6	0	25.4	59.7	28.2	0	0	0	7.4	7.6	5.4	28.4	26.8	12.6	0	0	0	5.7	4.4	11.3	55.5	100	33.8	0	0	0	5.2	5.6	5	66.5	43.3	79.7
Esculetin (6,7-dihydroxycoumarin)	Coumarins	C09263	ko01061		36.4	41.3	0	66.8	32.5	20.8	27.7	36.4	0	41.4	28.7	13.3	40.4	20.8	25.6	36	0	29.8	35.6	57.5	25.3	27.8	30.6	30.5	21.7	0	55.3	0	0	0	44.3	56.9	51.5	100	13.3	0
6-Methoxy-7,8-DihydroxyCoumarin	Coumarins	C09265	-		0	4.2	0	0	0	0	5.5	5.9	7.5	0	5	0	0	0	0	18.1	20.3	23.9	0	0	0	0	0	0	36.8	23.7	100	0	0	0	0	0	0	19.1	26.5	22.1
Esculin (6,7-Dihydroxycoumarin-6-glucoside)	Coumarins	C09264	-		3.8	11.9	4	1.3	1.7	0.9	28	37.4	44.3	1	2.3	1.3	2.3	1.9	2.1	76.5	61.3	61.9	1.3	0.9	1.3	2.6	2.1	2.8	48.7	52.6	39.8	0.8	0.4	1.2	2.8	3.3	2.7	70.9	67.5	100
Eudesmic acid (3,4,5-trimethoxybenzoic acid)	Benzoic acid derivatives	-	-		4.8	16	20.2	100	79.8	73.1	1.3	2	1.6	3.2	2.6	0	27.9	32.9	29.1	2	2.2	3	0	1.1	0	28.3	19.5	2.5	3.2	2.7	5.1	0	0	0	1.8	0	0	1.8	1.3	1
Butein	Flavanone	C08578	ko00941		47	34.4	27.6	0	16.1	15.3	87.3	100	75.4	0	7.7	0	17.4	13.2	0	54.2	61	54.7	0	0	0	10.3	16.2	9.4	72.9	50.8	80.9	0	0	0	18.8	17.2	9.2	73.3	62.3	60.2
Quercetin 7-O-β-D-Glucuronide	Flavonol	-	-		0	0	0	100	44.3	42.8	0	0	0	0	0	0	17.6	28.5	44.1	0	0	0	0	0	0	31	19.2	0	0	0	0	0	0	0	0	0	0	0	0	0
Sinapinaldehyde	Hydroxycinnamoyl derivatives	-	-		60.1	91.6	72.2	0	0	0	47.5	30.9	27.8	56.3	68.1	100	0	0	0	39.9	64.6	50.2	99.2	87.8	81	0	0	54.8	60.5	66.5	97.3	25.3	0	21.9	25.3	39.2	27	80.2	83.3	85.6
Kaempferol-3-O-robinoside-7-O-rhamnoside (Robinin)	Flavonol	C10178	-		0	11.9	3.6	38.1	91.8	100	0	0	0	18.5	15.1	6.6	59.6	70.4	71.9	0	0	0	0	0	0	60.3	21.9	2.7	0	0	0	0	0	0	0	0	0	0	0	0
Butin	Flavone	C09614	ko00941		0	3.7	1.8	21	15.3	7.4	2.7	2.5	2.9	0	2	0	2.7	3.4	2.7	0	0	0	0	0	0	3.9	15.8	87.8	0	0	0	0	0	0	100	99.1	98.2	0	0	0
Pantetheine	Vitamins	C00831	ko00332,ko00770,ko01130		0	0	0	14.4	13.1	9	0	0	0	20.8	24.5	19.1	4	3.7	3.1	0	0	0	32.9	49.8	100	2.9	4.3	2.5	0	0	0	98.6	97.4	92.1	28.7	24.5	19.1	0	0	0
Myricetin 3-O-galactoside	Flavonol	-	-		0	0	0	59.4	36.2	21.9	0	0	0	5.7	1.4	0	100	30.3	24.9	0	0	0	0	0	2.8	23.5	25.9	9.3	0	0	0	32.8	20.2	16.2	56.7	57.6	66.4	0	0	0
Formononetin 7-O-glucoside (Ononin)	Isoflavone	C10509	ko00943		0	19	3.5	0	0	0	32.1	100	22.3	0	0	0	0	0	0	18.6	49	43.9	0	0	0	0	0	0	32.3	51.4	37.6	0	0	0	0	0	0	60.1	4.8	38.6
Morin	Flavonol	C10105	-		0	1.5	0	2.8	8.7	27.1	0	0	0	0	1.5	0	24.4	26.4	34.4	1.8	0	0	0	0	1.4	13	14.6	3.8	0.5	0.8	0	1.7	1	0	100	62.8	11.3	1	0	1.5
Limonin	Terpenoids	C03514	-		2.9	3.8	3.8	41.7	13.4	8.2	2.2	3.2	13.5	2.2	1.8	1	25.7	21	16.2	25.8	23.7	33.3	1.1	0.7	0.5	24.5	18.8	100	34	28.6	28.8	0	0	0	23.8	23.7	21.7	15.1	34.9	26.7
Psoralen	Coumarins	C09305	ko01061,ko01110		11.4	21.7	11.4	100	50.8	23.5	4.6	3.9	0	2.4	3.2	0	17	34.6	30.7	0	0	0	0	0	0	35.9	37.5	24.9	0	0	0	0	0	0	21.7	16.9	16.2	0	0	0
Scoparone	Coumarins	C09311	-		32.6	96.8	58.3	77.7	42.1	81.5	0	0	0	51.3	55.1	33.3	72.4	73.3	55.1	0	0	0	22.4	25.3	0	100	48.3	63.3	0	0	0	0	0	0	53.1	42.8	43.7	0	0	0
Cyanidin	Anthocyanins	C05905	ko00941,ko00942,ko01061,ko01110		9	29.6	9.3	24.1	10.9	5.4	53.9	56.8	52	6.1	5.9	2.8	13.7	9.7	8.4	90.4	93	81.8	1.6	3.2	0	13.6	9.1	2.3	56.4	59.4	47	0.8	0.9	1.8	3	1.9	2.4	81.8	50.7	100
D-glucoronic acid	Carbohydrates	C00191	ko00040,ko00053,ko00520,ko00562,ko01100		86.5	54	43.9	3.6	6.9	5.7	47.5	32.1	28.3	42.3	67.9	67.9	6.5	12.7	12	25.4	42.7	44.4	66.3	48.7	46	14.7	11.3	20.1	45.8	63.9	34.6	54.2	53.2	57.1	13	22.8	20.3	53.1	100	68.4
D-Xylonic acid	Organic acids	-	-		25.9	12.4	13.3	2.8	1.4	2.5	56	43.3	44	7.7	10.6	11.5	2.3	2.1	1	37.6	54.3	55	9.4	12	7	1	1.5	0.9	59.2	59.2	56.7	6.9	3.9	5.9	0.7	0.7	1	98.6	100	96.1
Cytidine	Nucleotide and its derivates	C00475	ko00240,ko01100		43.1	69.7	72.6	45.1	69	93.5	4.8	3.9	3.1	29.7	52.5	34.4	73.5	83.1	100	2	4.4	3	62.2	39.2	7.3	94.4	76.5	43	2.4	4.8	2.3	1.1	1.1	1.4	32.1	25.8	33.2	0.8	2.8	3
3,4-Dihydroxy-DL-phenylalanine	Amino acid derivatives	C00355	-		0	0	0	0	0.6	0.7	0	0	0	0	0.8	0.9	0.8	1.2	0.6	0	0.7	0	0	0	1.2	1.2	9.3	1.7	0.5	0.5	0	0.7	0.7	0.5	100	79.9	62.6	0	0.5	0.8
Guanosine 3',5'-cyclic monophosphate	Nucleotide and its derivates	C00942	ko00230,ko04022,ko04270,ko04540,ko04611,ko04713,ko04730,ko04740,ko04744,ko04921,ko04923,ko04924,ko04925,ko04970,ko04976		0	0	0	0	0	0	31.6	49.6	57.6	0	0	0	0	0	0	78.5	65.2	58.2	0	0	0	0	0	0	100	76.3	58.5	0	0	0	0	0	0	50.6	46.4	53.4
Deoxyadenosine	Nucleotide and its derivates	C00559	ko00230,ko01100		11.4	13.4	6.1	100	42.4	28.9	9	7.6	9.1	7.1	26.6	9.4	23.8	28.6	23.5	17	28.2	18.8	13.6	17.6	23.9	20.1	30.7	19	18.2	20.9	20.9	5.8	5.1	7.5	37.9	36.4	42	14	24.9	18.6
2-(dimethylamino)guanosine	Nucleotide and its derivates	-	-		13.9	15.3	10.3	23.3	16.4	7.8	0.7	0.7	1.1	100	7.6	9.9	24.8	8.2	11.3	82.7	0.8	0.5	5	11.1	0.5	9.1	8.5	27.1	0.5	0.6	0.4	42.6	74.5	64.1	17.4	15.2	13.5	2.7	8	4.6
β-Pseudouridine	Nucleotide and its derivates	C02067	ko00240		7.2	8.3	7.7	91.1	100	70.2	8.4	5.3	9.5	6.7	23.1	16.1	43.6	28.3	27.8	19	34.2	24.4	20.1	24.4	17.4	25.8	31.1	24.8	20.2	16.6	26.8	5.5	4.5	4.4	21	24.5	24.7	10.9	23	18.8
Hypoxanthine-9-β-D-arabinofuranoside	Nucleotide and its derivates	-	-		42.3	35.7	29	48.8	66.7	32.5	82.2	100	90.6	5.1	0	5.8	25.2	30.5	40.6	24	32.5	30.1	3.2	0	3.1	24	42.8	48.8	31.4	16.8	8.7	5.5	3.2	4.1	28.7	36.7	38.3	0	5.9	5.4

## Sheet: Sheet2
Table S3. The aromatic amino acids and flavononids biosynthesis pathway genes in A.trifoliata
GeneID	Duplication type	WGCNA modules	Gene name(KEGG)	Sub-pathway	KEGG annotation	GO annotation	Pfam annotation	Swissprot annotation	NR annotation	NT annotation
EVM0019354	WGD or Segmental	grey60	aroF	Shikimate pathway	K01626|0|pxb:103962023|phospho-2-dehydro-3-deoxyheptonate aldolase 1, chloroplastic-like; K01626 3-deoxy-7-phosphoheptulonate synthase [EC:2.5.1.54] (A)	Molecular Function: 3-deoxy-7-phosphoheptulonate synthase activity (GO:0003849);; Cellular Component: mitochondrion (GO:0005739);; Biological Process: aromatic amino acid family biosynthetic process (GO:0009073);; Biological Process: chorismate biosynthetic process (GO:0009423);; Cellular Component: plastid (GO:0009536);; Biological Process: response to wounding (GO:0009611);; Biological Process:…	Class-II DAHP synthetase family	Phospho-2-dehydro-3-deoxyheptonate aldolase 2, chloroplastic (Precursor) OS=Solanum lycopersicum (Tomato) PE=2 SV=1	PREDICTED: phospho-2-dehydro-3-deoxyheptonate aldolase 1, chloroplastic-like [Pyrus x bretschneideri]	PREDICTED: Nelumbo nucifera phospho-2-dehydro-3-deoxyheptonate aldolase 2, chloroplastic-like (LOC104604561), mRNA
EVM0007865	WGD or Segmental	darkseagreen4	aroF	Shikimate pathway	K01626|0|pxb:103962023|phospho-2-dehydro-3-deoxyheptonate aldolase 1, chloroplastic-like; K01626 3-deoxy-7-phosphoheptulonate synthase [EC:2.5.1.54] (A)	Molecular Function: 3-deoxy-7-phosphoheptulonate synthase activity (GO:0003849);; Biological Process: aromatic amino acid family biosynthetic process (GO:0009073);; Biological Process: chorismate biosynthetic process (GO:0009423);; Cellular Component: plastid (GO:0009536);; Biological Process: response to wounding (GO:0009611);; Biological Process: systemic acquired resistance (GO:0009627);; Biol…	Class-II DAHP synthetase family	Phospho-2-dehydro-3-deoxyheptonate aldolase 2, chloroplastic (Precursor) OS=Solanum lycopersicum (Tomato) PE=2 SV=1	PREDICTED: phospho-2-dehydro-3-deoxyheptonate aldolase 1, chloroplastic-like [Pyrus x bretschneideri]	PREDICTED: Nelumbo nucifera phospho-2-dehydro-3-deoxyheptonate aldolase 2, chloroplastic-like (LOC104604561), mRNA
EVM0019816	Dispersed	-	aroF	Shikimate pathway	K01626|0|rcu:RCOM_0121060|Phospho-2-dehydro-3-deoxyheptonate aldolase 1, chloroplast precursor, putative (EC:2.5.1.54); K01626 3-deoxy-7-phosphoheptulonate synthase [EC:2.5.1.54] (A)	Molecular Function: 3-deoxy-7-phosphoheptulonate synthase activity (GO:0003849);; Biological Process: aromatic amino acid family biosynthetic process (GO:0009073);;	Class-II DAHP synthetase family	Phospho-2-dehydro-3-deoxyheptonate aldolase 2, chloroplastic (Precursor) GN=DHS2 OS=Arabidopsis thaliana (Mouse-ear cress) PE=2 SV=2	PREDICTED: phospho-2-dehydro-3-deoxyheptonate aldolase 2, chloroplastic-like [Nelumbo nucifera]	PREDICTED: Nelumbo nucifera phospho-2-dehydro-3-deoxyheptonate aldolase 2, chloroplastic-like (LOC104606377), mRNA
EVM0019604	Dispersed	-	aroF	Shikimate pathway	K01626|1.84323e-115|vvi:100251487|3-deoxy-D-arabino-heptulosonate-7-phosphate synthase 03; K01626 3-deoxy-7-phosphoheptulonate synthase [EC:2.5.1.54] (A)	Molecular Function: 3-deoxy-7-phosphoheptulonate synthase activity (GO:0003849);; Biological Process: aromatic amino acid family biosynthetic process (GO:0009073);;	Class-II DAHP synthetase family	Phospho-2-dehydro-3-deoxyheptonate aldolase 2, chloroplastic (Precursor) OS=Solanum lycopersicum (Tomato) PE=2 SV=1	PREDICTED: phospho-2-dehydro-3-deoxyheptonate aldolase 2, chloroplastic-like [Nelumbo nucifera]	PREDICTED: Nelumbo nucifera phospho-2-dehydro-3-deoxyheptonate aldolase 2, chloroplastic-like (LOC104606377), mRNA
EVM0016709	Dispersed	-	aroF	Shikimate pathway	K01626|1.95197e-134|vvi:100233115|3-deoxy-D-arabino-heptulosonate 7-phosphate synthase 02; K01626 3-deoxy-7-phosphoheptulonate synthase [EC:2.5.1.54] (A)	Molecular Function: 3-deoxy-7-phosphoheptulonate synthase activity (GO:0003849);; Cellular Component: mitochondrion (GO:0005739);; Biological Process: aromatic amino acid family biosynthetic process (GO:0009073);; Biological Process: chorismate biosynthetic process (GO:0009423);; Cellular Component: plastid (GO:0009536);; Biological Process: response to wounding (GO:0009611);; Biological Process:…	Class-II DAHP synthetase family	Phospho-2-dehydro-3-deoxyheptonate aldolase 1, chloroplastic (Precursor) GN=DHAPS-1 OS=Nicotiana tabacum (Common tobacco) PE=1 SV=1	3-deoxy-D-arabino-heptulosonate 7-phosphate synthase 02 [Vitis vinifera]	PREDICTED: Nelumbo nucifera phospho-2-dehydro-3-deoxyheptonate aldolase 2, chloroplastic-like (LOC104604561), mRNA
EVM0024081	Singleton	-	aroB	Shikimate pathway	K01735|0|pper:PRUPE_ppa004784mg|hypothetical protein; K01735 3-dehydroquinate synthase [EC:4.2.3.4] (A)	Molecular Function: 3-dehydroquinate synthase activity (GO:0003856);; Cellular Component: endosome (GO:0005768);; Cellular Component: Golgi apparatus (GO:0005794);; Cellular Component: trans-Golgi network (GO:0005802);; Biological Process: ubiquinone biosynthetic process (GO:0006744);; Biological Process: aromatic amino acid family biosynthetic process (GO:0009073);; Cellular Component: chloropla…	3-dehydroquinate synthase	3-dehydroquinate synthase, chloroplastic (Precursor) GN=DHQS OS=Actinidia chinensis (Kiwi) PE=1 SV=2	PREDICTED: 3-dehydroquinate synthase, chloroplastic-like isoform X1 [Nelumbo nucifera]	PREDICTED: Nelumbo nucifera 3-dehydroquinate synthase, chloroplastic-like (LOC104599575), transcript variant X1, mRNA
EVM0002410	WGD or Segmental	darkseagreen4	aroDE	Shikimate pathway	K13832|0|cit:102625541|bifunctional 3-dehydroquinate dehydratase/shikimate dehydrogenase, chloroplastic-like; K13832 3-dehydroquinate dehydratase / shikimate dehydrogenase [EC:4.2.1.10 1.1.1.25] (A)	Molecular Function: 3-dehydroquinate dehydratase activity (GO:0003855);; Molecular Function: shikimate 3-dehydrogenase (NADP+) activity (GO:0004764);; Biological Process: shikimate metabolic process (GO:0019632);; Molecular Function: NADP binding (GO:0050661);; Biological Process: oxidation-reduction process (GO:0055114);;	Type I 3-dehydroquinase	Shikimate dehydrogenase (Precursor) GN=EMB3004 OS=Arabidopsis thaliana (Mouse-ear cress) PE=1 SV=1	PREDICTED: bifunctional 3-dehydroquinate dehydratase/shikimate dehydrogenase, chloroplastic-like isoform X1 [Citrus sinensis]	Ricinus communis shikimate dehydrogenase, putative, mRNA
EVM0023199	WGD or Segmental	grey60	aroDE	Shikimate pathway	K13832|0|vvi:100242676|bifunctional 3-dehydroquinate dehydratase/shikimate dehydrogenase, chloroplastic; K13832 3-dehydroquinate dehydratase / shikimate dehydrogenase [EC:4.2.1.10 1.1.1.25] (A)	Molecular Function: 3-dehydroquinate dehydratase activity (GO:0003855);; Molecular Function: shikimate 3-dehydrogenase (NADP+) activity (GO:0004764);; Biological Process: shikimate metabolic process (GO:0019632);; Molecular Function: NADP binding (GO:0050661);; Biological Process: oxidation-reduction process (GO:0055114);;	Type I 3-dehydroquinase	Shikimate dehydrogenase (Precursor) GN=EMB3004 OS=Arabidopsis thaliana (Mouse-ear cress) PE=1 SV=1	PREDICTED: bifunctional 3-dehydroquinate dehydratase/shikimate dehydrogenase, chloroplastic isoform X2 [Nelumbo nucifera]	PREDICTED: Vitis vinifera bifunctional 3-dehydroquinate dehydratase/shikimate dehydrogenase, chloroplastic (LOC100242676), transcript variant X2, mRNA
EVM0009197	Tandem	-	aroDE	Shikimate pathway	K13832|0|vvi:100242676|bifunctional 3-dehydroquinate dehydratase/shikimate dehydrogenase, chloroplastic; K13832 3-dehydroquinate dehydratase / shikimate dehydrogenase [EC:4.2.1.10 1.1.1.25] (A)	Molecular Function: 3-dehydroquinate dehydratase activity (GO:0003855);; Molecular Function: shikimate 3-dehydrogenase (NADP+) activity (GO:0004764);; Biological Process: shikimate metabolic process (GO:0019632);; Molecular Function: NADP binding (GO:0050661);; Biological Process: oxidation-reduction process (GO:0055114);;	Type I 3-dehydroquinase	Shikimate dehydrogenase (Precursor) GN=EMB3004 OS=Arabidopsis thaliana (Mouse-ear cress) PE=1 SV=1	PREDICTED: bifunctional 3-dehydroquinate dehydratase/shikimate dehydrogenase, chloroplastic isoform X1 [Vitis vinifera]	PREDICTED: Vitis vinifera bifunctional 3-dehydroquinate dehydratase/shikimate dehydrogenase, chloroplastic (LOC100242676), transcript variant X1, mRNA
EVM0015870	Tandem	grey60	aroDE	Shikimate pathway	K13832|0|vvi:100253776|bifunctional 3-dehydroquinate dehydratase/shikimate dehydrogenase, chloroplastic; K13832 3-dehydroquinate dehydratase / shikimate dehydrogenase [EC:4.2.1.10 1.1.1.25] (A)	Molecular Function: 3-dehydroquinate dehydratase activity (GO:0003855);; Molecular Function: shikimate 3-dehydrogenase (NADP+) activity (GO:0004764);; Biological Process: oxidation-reduction process (GO:0055114);;	Type I 3-dehydroquinase	Shikimate dehydrogenase (Precursor) GN=EMB3004 OS=Arabidopsis thaliana (Mouse-ear cress) PE=1 SV=1	PREDICTED: bifunctional 3-dehydroquinate dehydratase/shikimate dehydrogenase, chloroplastic isoform X1 [Vitis vinifera]	PREDICTED: Vitis vinifera bifunctional 3-dehydroquinate dehydratase/shikimate dehydrogenase, chloroplastic (LOC100253776), transcript variant X1, mRNA
EVM0016759	WGD or Segmental	brown4	aroK	Shikimate pathway	K00891|1.78717e-138|pda:103721727|shikimate kinase 3, chloroplastic-like; K00891 shikimate kinase [EC:2.7.1.71] (A)	-	Shikimate kinase	Shikimate kinase 3, chloroplastic (Precursor) OS=Oryza sativa subsp. japonica (Rice) PE=1 SV=2	PREDICTED: shikimate kinase 3, chloroplastic-like [Phoenix dactylifera]	PREDICTED: Nelumbo nucifera shikimate kinase, chloroplastic (LOC104600011), transcript variant X1, mRNA
EVM0021990	WGD or Segmental	brown	aroK	Shikimate pathway	K00891|4.39307e-136|pda:103721727|shikimate kinase 3, chloroplastic-like; K00891 shikimate kinase [EC:2.7.1.71] (A)	-	Shikimate kinase	Shikimate kinase 2, chloroplastic (Precursor) GN=SK2 OS=Oryza sativa subsp. japonica (Rice) PE=1 SV=1	PREDICTED: shikimate kinase, chloroplastic isoform X1 [Nelumbo nucifera]	PREDICTED: Nelumbo nucifera shikimate kinase, chloroplastic (LOC104600011), transcript variant X1, mRNA
EVM0005751	Dispersed	-	aroK	Shikimate pathway	K00891|4.74883e-105|tcc:TCM_017289|Shikimate kinase, putative isoform 1; K00891 shikimate kinase [EC:2.7.1.71] (A)	-	Shikimate kinase	Probable inactive shikimate kinase like 1, chloroplastic (Precursor) GN=SKL1 OS=Arabidopsis thaliana (Mouse-ear cress) PE=2 SV=1	PREDICTED: probable inactive shikimate kinase like 1, chloroplastic isoform X2 [Nelumbo nucifera]	PREDICTED: Vitis vinifera probable inactive shikimate kinase like 1, chloroplastic (LOC100266919), transcript variant X4, mRNA
EVM0016808	WGD or Segmental	grey60	aroK	Shikimate pathway	K00891|7.12625e-139|pda:103721727|shikimate kinase 3, chloroplastic-like; K00891 shikimate kinase [EC:2.7.1.71] (A)	-	Shikimate kinase	Shikimate kinase, chloroplastic (Precursor) GN=SK OS=Solanum lycopersicum (Tomato) PE=1 SV=1	PREDICTED: shikimate kinase, chloroplastic isoform X1 [Nelumbo nucifera]	PREDICTED: Nelumbo nucifera shikimate kinase, chloroplastic (LOC104600011), transcript variant X1, mRNA
EVM0005610	WGD or Segmental	-	aroA	Shikimate pathway	K00800|0|fve:101298062|3-phosphoshikimate 1-carboxyvinyltransferase, chloroplastic-like; K00800 3-phosphoshikimate 1-carboxyvinyltransferase [EC:2.5.1.19] (A)	Molecular Function: 3-phosphoshikimate 1-carboxyvinyltransferase activity (GO:0003866);; Biological Process: aromatic amino acid family biosynthetic process (GO:0009073);; Biological Process: chorismate biosynthetic process (GO:0009423);;	EPSP synthase (3-phosphoshikimate 1-carboxyvinyltransferase)	3-phosphoshikimate 1-carboxyvinyltransferase, chloroplastic (Precursor) OS=Petunia hybrida (Petunia) PE=1 SV=1	PREDICTED: 3-phosphoshikimate 1-carboxyvinyltransferase 2 [Nelumbo nucifera]	PREDICTED: Nelumbo nucifera 3-phosphoshikimate 1-carboxyvinyltransferase 2 (LOC104602250), mRNA
EVM0023700	WGD or Segmental	grey60	aroA	Shikimate pathway	K00800|0|fve:101298062|3-phosphoshikimate 1-carboxyvinyltransferase, chloroplastic-like; K00800 3-phosphoshikimate 1-carboxyvinyltransferase [EC:2.5.1.19] (A)	Molecular Function: 3-phosphoshikimate 1-carboxyvinyltransferase activity (GO:0003866);; Cellular Component: cytosol (GO:0005829);; Biological Process: aromatic amino acid family biosynthetic process (GO:0009073);; Biological Process: chorismate biosynthetic process (GO:0009423);; Cellular Component: chloroplast stroma (GO:0009570);; Biological Process: glyphosate metabolic process (GO:0018920);;	EPSP synthase (3-phosphoshikimate 1-carboxyvinyltransferase)	3-phosphoshikimate 1-carboxyvinyltransferase, chloroplastic (Precursor) GN=At2g45300 OS=Arabidopsis thaliana (Mouse-ear cress) PE=2 SV=3	PREDICTED: 3-phosphoshikimate 1-carboxyvinyltransferase 2 [Nelumbo nucifera]	PREDICTED: Nelumbo nucifera 3-phosphoshikimate 1-carboxyvinyltransferase 2 (LOC104602250), mRNA
EVM0006065	Singleton	-	aroC	Shikimate pathway	K01736|0|cit:102627582|chorismate synthase, chloroplastic-like; K01736 chorismate synthase [EC:4.2.3.5] (A)	Molecular Function: chorismate synthase activity (GO:0004107);; Cellular Component: nucleolus (GO:0005730);; Biological Process: aromatic amino acid family biosynthetic process (GO:0009073);; Biological Process: chorismate biosynthetic process (GO:0009423);; Cellular Component: chloroplast (GO:0009507);; Biological Process: shikimate biosynthetic process (GO:0033587);;	Chorismate synthase	Chorismate synthase, chloroplastic (Precursor) OS=Capnoides sempervirens (Rock-harlequin) PE=1 SV=1	RecName: Full=Chorismate synthase, chloroplastic; AltName: Full=5-enolpyruvylshikimate-3-phosphate phospholyase; Flags: Precursor [Capnoides sempervirens]	C.sempervirens mRNA for chorismate synthase precursor
EVM0001222	Tandem	brown4	trpE	Tryptophan biosynthesis pathway	K01657|0|cic:CICLE_v10028065mg|hypothetical protein; K01657 anthranilate synthase component I [EC:4.1.3.27] (A)	-	chorismate binding enzyme	Anthranilate synthase alpha subunit 1, chloroplastic (Precursor) GN=At5g05730 OS=Arabidopsis thaliana (Mouse-ear cress) PE=1 SV=1	PREDICTED: anthranilate synthase alpha subunit 1, chloroplastic-like [Nelumbo nucifera]	PREDICTED: Nelumbo nucifera anthranilate synthase alpha subunit 1, chloroplastic-like (LOC104608403), mRNA
EVM0012143	WGD or Segmental	-	trpE	Tryptophan biosynthesis pathway	K01657|0|cic:CICLE_v10028065mg|hypothetical protein; K01657 anthranilate synthase component I [EC:4.1.3.27] (A)	Biological Process: tryptophan biosynthetic process (GO:0000162);; Molecular Function: anthranilate synthase activity (GO:0004049);;	chorismate binding enzyme	Anthranilate synthase alpha subunit 2, chloroplastic (Precursor) GN=ASA2 OS=Arabidopsis thaliana (Mouse-ear cress) PE=2 SV=1	PREDICTED: anthranilate synthase alpha subunit 2, chloroplastic-like isoform X2 [Nicotiana tomentosiformis]	PREDICTED: Nelumbo nucifera anthranilate synthase alpha subunit 1, chloroplastic (LOC104596958), transcript variant X1, mRNA
EVM0000759	WGD or Segmental	-	trpE	Tryptophan biosynthesis pathway	K01657|0|mus:103997186|anthranilate synthase alpha subunit 1, chloroplastic-like; K01657 anthranilate synthase component I [EC:4.1.3.27] (A)	-	chorismate binding enzyme	Anthranilate synthase alpha subunit 1, chloroplastic (Precursor) GN=ASA1 OS=Oryza sativa subsp. indica (Rice) PE=3 SV=1	PREDICTED: anthranilate synthase alpha subunit 1, chloroplastic-like [Nelumbo nucifera]	PREDICTED: Nelumbo nucifera anthranilate synthase alpha subunit 1, chloroplastic-like (LOC104608982), mRNA
EVM0000782	Dispersed	-	trpE	Tryptophan biosynthesis pathway	K01657|2.05082e-39|mdm:103412832|anthranilate synthase alpha subunit 2, chloroplastic-like; K01657 anthranilate synthase component I [EC:4.1.3.27] (A)	Biological Process: tryptophan biosynthetic process (GO:0000162);; Molecular Function: anthranilate synthase activity (GO:0004049);;	chorismate binding enzyme	Anthranilate synthase alpha subunit 1, chloroplastic (Precursor) OS=Oryza sativa subsp. japonica (Rice) PE=1 SV=1	hypothetical protein JCGZ_01300 [Jatropha curcas]	PREDICTED: Nelumbo nucifera anthranilate synthase alpha subunit 1, chloroplastic-like (LOC104608982), mRNA
EVM0002789	Tandem	-	trpE	Tryptophan biosynthesis pathway	K01657|6.63465e-110|pxb:103963209|anthranilate synthase alpha subunit 2, chloroplastic-like; K01657 anthranilate synthase component I [EC:4.1.3.27] (A)	-	Anthranilate synthase component I, N terminal region	Anthranilate synthase alpha subunit 2, chloroplastic (Precursor) GN=ASA2 OS=Arabidopsis thaliana (Mouse-ear cress) PE=2 SV=1	PREDICTED: anthranilate synthase alpha subunit 1, chloroplastic-like [Nelumbo nucifera]	PREDICTED: Nelumbo nucifera anthranilate synthase alpha subunit 1, chloroplastic-like (LOC104608403), mRNA
EVM0002766	Dispersed	-	trpE	Tryptophan biosynthesis pathway	K01657|9.83356e-20|rcu:RCOM_0611770|anthranilate synthase component I, putative (EC:4.1.3.27); K01657 anthranilate synthase component I [EC:4.1.3.27] (A)	-	chorismate binding enzyme	Anthranilate synthase alpha subunit 2, chloroplastic (Precursor) OS=Oryza sativa subsp. japonica (Rice) PE=1 SV=1	anthranilate synthase component I, putative [Ricinus communis]	Solanum lycopersicum chromosome ch06, complete genome
EVM0016991	WGD or Segmental	grey60	trpD	Tryptophan biosynthesis pathway	K00766|0|vvi:100255305|anthranilate phosphoribosyltransferase, chloroplastic; K00766 anthranilate phosphoribosyltransferase [EC:2.4.2.18] (A)	Biological Process: tryptophan biosynthetic process (GO:0000162);; Molecular Function: anthranilate phosphoribosyltransferase activity (GO:0004048);; Biological Process: tryptophan catabolic process (GO:0006569);; Cellular Component: chloroplast stroma (GO:0009570);; Biological Process: systemic acquired resistance (GO:0009627);; Biological Process: indoleacetic acid biosynthetic process (GO:0009…	Glycosyl transferase family, a/b domain	Anthranilate phosphoribosyltransferase, chloroplastic (Precursor) GN=PAT1 OS=Arabidopsis thaliana (Mouse-ear cress) PE=2 SV=1	PREDICTED: anthranilate phosphoribosyltransferase, chloroplastic [Vitis vinifera]	PREDICTED: Nelumbo nucifera anthranilate phosphoribosyltransferase, chloroplastic-like (LOC104591422), transcript variant X3, mRNA
EVM0002606	WGD or Segmental	darkseagreen4	trpD	Tryptophan biosynthesis pathway	K00766|0|vvi:100255305|anthranilate phosphoribosyltransferase, chloroplastic; K00766 anthranilate phosphoribosyltransferase [EC:2.4.2.18] (A)	Biological Process: tryptophan biosynthetic process (GO:0000162);; Molecular Function: anthranilate phosphoribosyltransferase activity (GO:0004048);; Biological Process: tryptophan catabolic process (GO:0006569);; Cellular Component: chloroplast stroma (GO:0009570);; Biological Process: systemic acquired resistance (GO:0009627);; Biological Process: indoleacetic acid biosynthetic process (GO:0009…	Glycosyl transferase family, a/b domain	Anthranilate phosphoribosyltransferase, chloroplastic (Precursor) GN=PAT1 OS=Arabidopsis thaliana (Mouse-ear cress) PE=2 SV=1	hypothetical protein JCGZ_11455 [Jatropha curcas]	PREDICTED: Nelumbo nucifera anthranilate phosphoribosyltransferase, chloroplastic-like (LOC104593158), mRNA
EVM0013530	Dispersed	-	trpC	Tryptophan biosynthesis pathway	K01609|0|vvi:100251045|indole-3-glycerol phosphate synthase, chloroplastic; K01609 indole-3-glycerol phosphate synthase [EC:4.1.1.48] (A)	Molecular Function: indole-3-glycerol-phosphate synthase activity (GO:0004425);; Biological Process: tryptophan metabolic process (GO:0006568);;	Indole-3-glycerol phosphate synthase	Indole-3-glycerol phosphate synthase, chloroplastic (Precursor) GN=At2g04400 OS=Arabidopsis thaliana (Mouse-ear cress) PE=2 SV=2	PREDICTED: indole-3-glycerol phosphate synthase, chloroplastic-like isoform X1 [Nelumbo nucifera]	PREDICTED: Nelumbo nucifera indole-3-glycerol phosphate synthase, chloroplastic-like (LOC104608382), transcript variant X4, mRNA
EVM0003224	Proximal	-	trpC	Tryptophan biosynthesis pathway	K01609|0|vvi:100251045|indole-3-glycerol phosphate synthase, chloroplastic; K01609 indole-3-glycerol phosphate synthase [EC:4.1.1.48] (A)	Molecular Function: indole-3-glycerol-phosphate synthase activity (GO:0004425);; Biological Process: tryptophan metabolic process (GO:0006568);;	Indole-3-glycerol phosphate synthase	Indole-3-glycerol phosphate synthase, chloroplastic (Precursor) GN=At2g04400 OS=Arabidopsis thaliana (Mouse-ear cress) PE=2 SV=2	PREDICTED: indole-3-glycerol phosphate synthase, chloroplastic [Vitis vinifera]	PREDICTED: Nelumbo nucifera indole-3-glycerol phosphate synthase, chloroplastic-like (LOC104608382), transcript variant X4, mRNA
EVM0010185	Dispersed	-	trpC	Tryptophan biosynthesis pathway	K01609|0|vvi:100251045|indole-3-glycerol phosphate synthase, chloroplastic; K01609 indole-3-glycerol phosphate synthase [EC:4.1.1.48] (A)	Molecular Function: indole-3-glycerol-phosphate synthase activity (GO:0004425);; Biological Process: tryptophan metabolic process (GO:0006568);;	Indole-3-glycerol phosphate synthase	Indole-3-glycerol phosphate synthase, chloroplastic (Precursor) GN=At2g04400 OS=Arabidopsis thaliana (Mouse-ear cress) PE=2 SV=2	PREDICTED: indole-3-glycerol phosphate synthase, chloroplastic [Vitis vinifera]	PREDICTED: Nelumbo nucifera indole-3-glycerol phosphate synthase, chloroplastic-like (LOC104608382), transcript variant X4, mRNA
EVM0005060	Singleton	-	trpC	Tryptophan biosynthesis pathway	K01609|1.45705e-08|tcc:TCM_002432|Aldolase-type TIM barrel family protein; K01609 indole-3-glycerol phosphate synthase [EC:4.1.1.48] (A)	-	-	Indole-3-glycerol phosphate synthase, chloroplastic (Precursor) GN=At2g04400 OS=Arabidopsis thaliana (Mouse-ear cress) PE=2 SV=2	Indole-3-glycerol phosphate synthase [Morus notabilis]	Vitis vinifera clone SS0ACG72YC10
EVM0006568	Proximal	-	trpC	Tryptophan biosynthesis pathway	K01609|2.34257e-46|pop:POPTR_0014s16700g|POPTRDRAFT_834976; hypothetical protein; K01609 indole-3-glycerol phosphate synthase [EC:4.1.1.48] (A)	Biological Process: metabolic process (GO:0008152);; Molecular Function: lyase activity (GO:0016829);;	Indole-3-glycerol phosphate synthase	Indole-3-glycerol phosphate synthase, chloroplastic (Precursor) GN=At2g04400 OS=Arabidopsis thaliana (Mouse-ear cress) PE=2 SV=2	hypothetical protein JCGZ_18522 [Jatropha curcas]	PREDICTED: Vitis vinifera indole-3-glycerol phosphate synthase, chloroplastic (LOC100251045), mRNA
EVM0002386	Dispersed	-	trpG	Tryptophan biosynthesis pathway	K01658|3.408e-90|vvi:100257728|anthranilate synthase beta subunit 1, chloroplastic-like; K01658 anthranilate synthase component II [EC:4.1.3.27] (A)	Biological Process: tryptophan biosynthetic process (GO:0000162);; Molecular Function: anthranilate synthase activity (GO:0004049);; Cellular Component: mitochondrion (GO:0005739);; Biological Process: response to bacterium (GO:0009617);; Biological Process: response to salt stress (GO:0009651);; Biological Process: response to ethylene (GO:0009723);; Biological Process: auxin biosynthetic proces…	Glutamine amidotransferase class-I	Anthranilate synthase beta subunit 1, chloroplastic (Precursor) GN=F4F7.39 OS=Arabidopsis thaliana (Mouse-ear cress) PE=1 SV=1	PREDICTED: anthranilate synthase beta subunit 1, chloroplastic-like isoform X1 [Vitis vinifera]	PREDICTED: Nelumbo nucifera anthranilate synthase beta subunit 2, chloroplastic-like (LOC104607268), transcript variant X2, mRNA
EVM0015019	Singleton	-	trpF	Tryptophan biosynthesis pathway	K01817|5.77217e-131|vvi:100255311|N-(5'-phosphoribosyl)anthranilate isomerase 1, chloroplastic; K01817 phosphoribosylanthranilate isomerase [EC:5.3.1.24] (A)	Molecular Function: phosphoribosylanthranilate isomerase activity (GO:0004640);; Biological Process: tryptophan metabolic process (GO:0006568);;	N-(5'phosphoribosyl)anthranilate (PRA) isomerase	N-(5&apos;-phosphoribosyl)anthranilate isomerase 1, chloroplastic (Precursor) GN=F24B9.11 OS=Arabidopsis thaliana (Mouse-ear cress) PE=2 SV=1	PREDICTED: N-(5&apos;-phosphoribosyl)anthranilate isomerase 1, chloroplastic [Vitis vinifera]	PREDICTED: Nelumbo nucifera N-(5'-phosphoribosyl)anthranilate isomerase 1, chloroplastic-like (LOC104602584), transcript variant X2, mRNA
EVM0017578	WGD or Segmental	brown	trpA	Tryptophan biosynthesis pathway	K01695|2.17017e-173|cit:102608720|tryptophan synthase alpha chain, chloroplastic-like; K01695 tryptophan synthase alpha chain [EC:4.2.1.20] (A)	Biological Process: tryptophan biosynthetic process (GO:0000162);; Biological Process: RNA splicing, via endonucleolytic cleavage and ligation (GO:0000394);; Molecular Function: tryptophan synthase activity (GO:0004834);; Cellular Component: cytoplasm (GO:0005737);; Biological Process: one-carbon metabolic process (GO:0006730);; Biological Process: methionine biosynthetic process (GO:0009086);; M…	Tryptophan synthase alpha chain	Tryptophan synthase alpha chain, chloroplastic (Precursor) GN=T14E10.210 OS=Arabidopsis thaliana (Mouse-ear cress) PE=1 SV=1	hypothetical protein CISIN_1g021527mg [Citrus sinensis]	PREDICTED: Nelumbo nucifera tryptophan synthase alpha chain (LOC104609565), mRNA
EVM0021076	WGD or Segmental	-	trpA	Tryptophan biosynthesis pathway	K01695|2.51551e-175|cit:102608720|tryptophan synthase alpha chain, chloroplastic-like; K01695 tryptophan synthase alpha chain [EC:4.2.1.20] (A)	Biological Process: tryptophan biosynthetic process (GO:0000162);; Biological Process: RNA splicing, via endonucleolytic cleavage and ligation (GO:0000394);; Molecular Function: tryptophan synthase activity (GO:0004834);; Cellular Component: cytoplasm (GO:0005737);; Biological Process: one-carbon metabolic process (GO:0006730);; Biological Process: methionine biosynthetic process (GO:0009086);; M…	Tryptophan synthase alpha chain	Tryptophan synthase alpha chain, chloroplastic (Precursor) GN=T14E10.210 OS=Arabidopsis thaliana (Mouse-ear cress) PE=1 SV=1	hypothetical protein CICLE_v10021275mg [Citrus clementina]	PREDICTED: Nelumbo nucifera tryptophan synthase alpha chain (LOC104589645), transcript variant X2, mRNA
EVM0005540	WGD or Segmental	-	trpA	Tryptophan biosynthesis pathway	K01696|0|eus:EUTSA_v10025097mg|hypothetical protein; K01696 tryptophan synthase beta chain [EC:4.2.1.20] (A)	Biological Process: tryptophan biosynthetic process (GO:0000162);; Molecular Function: tryptophan synthase activity (GO:0004834);; Cellular Component: chloroplast stroma (GO:0009570);; Cellular Component: chloroplast envelope (GO:0009941);; Molecular Function: pyridoxal phosphate binding (GO:0030170);;	Pyridoxal-phosphate dependent enzyme	Tryptophan synthase beta chain 2, chloroplastic (Precursor) GN=TSB OS=Camptotheca acuminata (Happy tree) PE=2 SV=1	PREDICTED: tryptophan synthase beta chain 1 [Nelumbo nucifera]	PREDICTED: Nelumbo nucifera tryptophan synthase beta chain 1 (LOC104600965), mRNA
EVM0006442	WGD or Segmental	grey60	trpA	Tryptophan biosynthesis pathway	K01696|2.35082e-96|tcc:TCM_030179|Pyridoxal-5\'-phosphate-dependent enzyme family protein isoform 1; K01696 tryptophan synthase beta chain [EC:4.2.1.20] (A)	Biological Process: tryptophan biosynthetic process (GO:0000162);; Molecular Function: tryptophan synthase activity (GO:0004834);; Molecular Function: pyridoxal phosphate binding (GO:0030170);; Molecular Function: 2-alkenal reductase [NAD(P)] activity (GO:0032440);; Biological Process: oxidation-reduction process (GO:0055114);;	Pyridoxal-phosphate dependent enzyme	Tryptophan synthase beta chain 2, chloroplastic (Precursor) GN=TSB OS=Camptotheca acuminata (Happy tree) PE=2 SV=1	PREDICTED: tryptophan synthase beta chain 2, chloroplastic-like [Nelumbo nucifera]	PREDICTED: Nelumbo nucifera tryptophan synthase beta chain 2, chloroplastic-like (LOC104610958), mRNA
EVM0019150	Dispersed	-	trpB	Tryptophan biosynthesis pathway	K06001|0|tcc:TCM_019615|Tryptophan synthase beta type 2; K06001 tryptophan synthase beta chain [EC:4.2.1.20] (A)	Biological Process: tryptophan biosynthetic process (GO:0000162);; Molecular Function: tryptophan synthase activity (GO:0004834);; Molecular Function: pyridoxal phosphate binding (GO:0030170);; Molecular Function: protein homodimerization activity (GO:0042803);; Molecular Function: L-serine hydro-lyase (adding indole, L-tryptophan-forming) activity (GO:0052684);;	Pyridoxal-phosphate dependent enzyme	Tryptophan synthase beta chain 2, chloroplastic (Precursor) GN=TSB2 OS=Arabidopsis thaliana (Mouse-ear cress) PE=2 SV=2	PREDICTED: tryptophan synthase beta chain 1, chloroplastic isoform X2 [Nelumbo nucifera]	PREDICTED: Nelumbo nucifera tryptophan synthase beta chain 1, chloroplastic (LOC104600681), transcript variant X1, mRNA
EVM0019392	Dispersed	-	CHM	Arogenate and phenylpyruvate pathway	K01850|1.12216e-155|mdm:103402853|chorismate mutase 3, chloroplastic; K01850 chorismate mutase [EC:5.4.99.5] (A)	Molecular Function: chorismate mutase activity (GO:0004106);; Biological Process: aromatic amino acid family biosynthetic process (GO:0009073);; Cellular Component: cytoplasmic part (GO:0044444);; Biological Process: chorismate metabolic process (GO:0046417);;	Chorismate mutase type II	Chorismate mutase 3, chloroplastic (Precursor) GN=CM3 OS=Arabidopsis thaliana (Mouse-ear cress) PE=1 SV=1	PREDICTED: chorismate mutase 1, chloroplastic-like isoform X1 [Nelumbo nucifera]	PREDICTED: Nelumbo nucifera chorismate mutase 3, chloroplastic-like (LOC104598032), mRNA
EVM0020427	Dispersed	grey60	CHM	Arogenate and phenylpyruvate pathway	K01850|2.39342e-133|tcc:TCM_036909|Chorismate mutase 2; K01850 chorismate mutase [EC:5.4.99.5] (A)	Molecular Function: chorismate mutase activity (GO:0004106);; Cellular Component: cytosol (GO:0005829);; Biological Process: aromatic amino acid family biosynthetic process (GO:0009073);; Biological Process: chorismate metabolic process (GO:0046417);;	Chorismate mutase type II	Chorismate mutase 2 GN=CM2 OS=Arabidopsis thaliana (Mouse-ear cress) PE=1 SV=1	PREDICTED: chorismate mutase 2 [Nelumbo nucifera]	PREDICTED: Nelumbo nucifera chorismate mutase 2 (LOC104603298), mRNA
EVM0010115	Dispersed	-	CHM	Arogenate and phenylpyruvate pathway	K01850|3.90165e-159|mdm:103402853|chorismate mutase 3, chloroplastic; K01850 chorismate mutase [EC:5.4.99.5] (A)	Molecular Function: chorismate mutase activity (GO:0004106);; Cellular Component: cytosol (GO:0005829);; Biological Process: glucose catabolic process (GO:0006007);; Biological Process: aromatic amino acid family biosynthetic process (GO:0009073);; Cellular Component: plastid (GO:0009536);; Molecular Function: L-ascorbate peroxidase activity (GO:0016688);; Biological Process: chorismate metabolic…	Chorismate mutase type II	Chorismate mutase 3, chloroplastic (Precursor) GN=CM3 OS=Arabidopsis thaliana (Mouse-ear cress) PE=1 SV=1	PREDICTED: chorismate mutase 1, chloroplastic-like isoform X1 [Nelumbo nucifera]	PREDICTED: Nelumbo nucifera chorismate mutase 1, chloroplastic-like (LOC104598462), transcript variant X1, mRNA
EVM0006124	Dispersed	brown	PAT,AAT	Arogenate and phenylpyruvate pathway	K15849|0|tcc:TCM_001170|Aspartate aminotransferase isoform 1; K15849 bifunctional aspartate aminotransferase and glutamate/aspartate-prephenate aminotransferase [EC:2.6.1.1 2.6.1.78 2.6.1.79] (A)	Molecular Function: L-aspartate:2-oxoglutarate aminotransferase activity (GO:0004069);; Biological Process: L-phenylalanine biosynthetic process (GO:0009094);; Cellular Component: chloroplast stroma (GO:0009570);; Biological Process: embryo development ending in seed dormancy (GO:0009793);; Molecular Function: pyridoxal phosphate binding (GO:0030170);; Molecular Function: aspartate-prephenate ami…	Aminotransferase class I and II	Bifunctional aspartate aminotransferase and glutamate/aspartate-prephenate aminotransferase (Precursor) OS=Petunia hybrida (Petunia) PE=1 SV=1	PREDICTED: bifunctional aspartate aminotransferase and glutamate/aspartate-prephenate aminotransferase-like [Nelumbo nucifera]	PREDICTED: Nelumbo nucifera bifunctional aspartate aminotransferase and glutamate/aspartate-prephenate aminotransferase-like (LOC104600083), mRNA
EVM0018194	Dispersed	brown4	ADT	Arogenate and phenylpyruvate pathway	K05359|0|pda:103708962|arogenate dehydratase/prephenate dehydratase 2, chloroplastic; K05359 arogenate/prephenate dehydratase [EC:4.2.1.91 4.2.1.51] (A)	Molecular Function: prephenate dehydratase activity (GO:0004664);; Biological Process: L-phenylalanine biosynthetic process (GO:0009094);; Biological Process: response to abiotic stimulus (GO:0009628);; Molecular Function: amino acid binding (GO:0016597);; Biological Process: single-multicellular organism process (GO:0044707);;	Prephenate dehydratase	Arogenate dehydratase/prephenate dehydratase 2, chloroplastic (Precursor) GN=MLP3.8 OS=Arabidopsis thaliana (Mouse-ear cress) PE=1 SV=1	PREDICTED: arogenate dehydratase/prephenate dehydratase 2, chloroplastic isoform X1 [Phoenix dactylifera]	PREDICTED: Nelumbo nucifera arogenate dehydratase/prephenate dehydratase 2, chloroplastic (LOC104594755), mRNA
EVM0014101	Tandem	brown4	ADT	Arogenate and phenylpyruvate pathway	K05359|0|pmum:103324547|arogenate dehydratase/prephenate dehydratase 1, chloroplastic; K05359 arogenate/prephenate dehydratase [EC:4.2.1.91 4.2.1.51] (A)	Molecular Function: prephenate dehydratase activity (GO:0004664);; Biological Process: L-phenylalanine biosynthetic process (GO:0009094);; Biological Process: vernalization response (GO:0010048);; Molecular Function: amino acid binding (GO:0016597);; Biological Process: anthocyanin accumulation in tissues in response to UV light (GO:0043481);; Biological Process: chorismate metabolic process (GO:…	Prephenate dehydratase	Arogenate dehydratase/prephenate dehydratase 1, chloroplastic (Precursor) GN=F25C20.4 OS=Arabidopsis thaliana (Mouse-ear cress) PE=1 SV=1	PREDICTED: arogenate dehydratase/prephenate dehydratase 1, chloroplastic [Nelumbo nucifera]	PREDICTED: Nelumbo nucifera arogenate dehydratase/prephenate dehydratase 1, chloroplastic (LOC104612774), mRNA
EVM0005743	WGD or Segmental	grey60	ADT	Arogenate and phenylpyruvate pathway	K05359|0|vvi:100267022|arogenate dehydratase/prephenate dehydratase 6, chloroplastic-like; K05359 arogenate/prephenate dehydratase [EC:4.2.1.91 4.2.1.51] (A)	Molecular Function: prephenate dehydratase activity (GO:0004664);; Biological Process: L-phenylalanine biosynthetic process (GO:0009094);; Molecular Function: arogenate dehydratase activity (GO:0047769);;	Prephenate dehydratase	Arogenate dehydratase/prephenate dehydratase 6, chloroplastic (Precursor) GN=T23G18.10 OS=Arabidopsis thaliana (Mouse-ear cress) PE=1 SV=1	PREDICTED: arogenate dehydratase 3, chloroplastic [Vitis vinifera]	PREDICTED: Nelumbo nucifera arogenate dehydratase/prephenate dehydratase 6, chloroplastic-like (LOC104587717), mRNA
EVM0001040	WGD or Segmental	brown	ADT	Arogenate and phenylpyruvate pathway	K05359|0|vvi:100267022|arogenate dehydratase/prephenate dehydratase 6, chloroplastic-like; K05359 arogenate/prephenate dehydratase [EC:4.2.1.91 4.2.1.51] (A)	Molecular Function: prephenate dehydratase activity (GO:0004664);; Biological Process: L-phenylalanine biosynthetic process (GO:0009094);; Molecular Function: arogenate dehydratase activity (GO:0047769);;	Prephenate dehydratase	Arogenate dehydratase/prephenate dehydratase 6, chloroplastic (Precursor) GN=T23G18.10 OS=Arabidopsis thaliana (Mouse-ear cress) PE=1 SV=1	PREDICTED: arogenate dehydratase 3, chloroplastic [Vitis vinifera]	PREDICTED: Nelumbo nucifera arogenate dehydratase/prephenate dehydratase 6, chloroplastic-like (LOC104587717), mRNA
EVM0001716	WGD or Segmental	grey60	ADT	Arogenate and phenylpyruvate pathway	K05359|1.3659e-166|pmum:103324547|arogenate dehydratase/prephenate dehydratase 1, chloroplastic; K05359 arogenate/prephenate dehydratase [EC:4.2.1.91 4.2.1.51] (A)	Biological Process: response to abiotic stimulus (GO:0009628);; Molecular Function: hydro-lyase activity (GO:0016836);; Biological Process: carboxylic acid metabolic process (GO:0019752);; Biological Process: single-multicellular organism process (GO:0044707);;	Prephenate dehydratase	Arogenate dehydratase/prephenate dehydratase 1, chloroplastic (Precursor) GN=F25C20.4 OS=Arabidopsis thaliana (Mouse-ear cress) PE=1 SV=1	PREDICTED: arogenate dehydratase/prephenate dehydratase 1, chloroplastic [Nelumbo nucifera]	PREDICTED: Nelumbo nucifera arogenate dehydratase/prephenate dehydratase 1, chloroplastic (LOC104612774), mRNA
EVM0016220	Dispersed	-	ADT	Arogenate and phenylpyruvate pathway	K05359|1.91895e-131|mus:103970819|arogenate dehydratase/prephenate dehydratase 2, chloroplastic-like; K05359 arogenate/prephenate dehydratase [EC:4.2.1.91 4.2.1.51] (A)	Biological Process: metabolic process (GO:0008152);; Molecular Function: lyase activity (GO:0016829);;	Prephenate dehydratase	Arogenate dehydratase 3, chloroplastic (Precursor) GN=F15K20.8 OS=Arabidopsis thaliana (Mouse-ear cress) PE=1 SV=1	PREDICTED: arogenate dehydratase/prephenate dehydratase 2, chloroplastic-like [Nelumbo nucifera]	PREDICTED: Nelumbo nucifera arogenate dehydratase/prephenate dehydratase 2, chloroplastic-like (LOC104588960), mRNA
EVM0010445	WGD or Segmental	-	ADT	Arogenate and phenylpyruvate pathway	K05359|1.98665e-128|pda:103711131|arogenate dehydratase 3, chloroplastic-like; K05359 arogenate/prephenate dehydratase [EC:4.2.1.91 4.2.1.51] (A)	-	Prephenate dehydratase	Serine/arginine-rich splicing factor RS40 GN=M7J2.130 OS=Arabidopsis thaliana (Mouse-ear cress) PE=1 SV=2	PREDICTED: arogenate dehydratase/prephenate dehydratase 6, chloroplastic-like [Nelumbo nucifera]	PREDICTED: Nelumbo nucifera serine/arginine-rich splicing factor RS41 (LOC104612697), transcript variant X1, mRNA
EVM0022477	WGD or Segmental	-	ADT	Arogenate and phenylpyruvate pathway	K05359|2.37529e-38|rcu:RCOM_0856680|prephenate dehydratase, putative (EC:4.2.1.51); K05359 arogenate/prephenate dehydratase [EC:4.2.1.91 4.2.1.51] (A)	Molecular Function: prephenate dehydratase activity (GO:0004664);; Biological Process: L-phenylalanine biosynthetic process (GO:0009094);; Molecular Function: amino acid binding (GO:0016597);; Biological Process: chorismate metabolic process (GO:0046417);;	-	Arogenate dehydratase/prephenate dehydratase 1, chloroplastic (Precursor) GN=F25C20.4 OS=Arabidopsis thaliana (Mouse-ear cress) PE=1 SV=1	prephenate dehydratase, putative [Ricinus communis]	PREDICTED: Citrus sinensis arogenate dehydratase/prephenate dehydratase 1, chloroplastic-like (LOC102627211), transcript variant X2, mRNA
EVM0002297	WGD or Segmental	darkseagreen4	ADT	Arogenate and phenylpyruvate pathway	K05359|2.51049e-153|pda:103716863|arogenate dehydratase 3, chloroplastic-like; K05359 arogenate/prephenate dehydratase [EC:4.2.1.91 4.2.1.51] (A)	-	Prephenate dehydratase	Arogenate dehydratase/prephenate dehydratase 6, chloroplastic (Precursor) GN=T23G18.10 OS=Arabidopsis thaliana (Mouse-ear cress) PE=1 SV=1	PREDICTED: arogenate dehydratase 3, chloroplastic-like [Phoenix dactylifera]	PREDICTED: Nelumbo nucifera arogenate dehydratase/prephenate dehydratase 6, chloroplastic-like (LOC104612747), mRNA
EVM0009340	WGD or Segmental	grey60	TYRAAT(ADH)	Arogenate and phenylpyruvate pathway	K15227|0|atr:s00021p00070600|AMTR_s00021p00070600; hypothetical protein; K15227 arogenate dehydrogenase (NADP+), plant [EC:1.3.1.78] (A)	Molecular Function: prephenate dehydrogenase (NADP+) activity (GO:0004665);; Cellular Component: mitochondrion (GO:0005739);; Biological Process: tyrosine biosynthetic process (GO:0006571);; Molecular Function: prephenate dehydrogenase activity (GO:0008977);; Cellular Component: chloroplast (GO:0009507);; Biological Process: oxidation-reduction process (GO:0055114);;	Prephenate dehydrogenase	Arogenate dehydrogenase 2, chloroplastic (Precursor) GN=TYRAAT2 OS=Arabidopsis thaliana (Mouse-ear cress) PE=1 SV=1	PREDICTED: arogenate dehydrogenase 2, chloroplastic-like [Nelumbo nucifera]	PREDICTED: Nelumbo nucifera arogenate dehydrogenase 2, chloroplastic-like (LOC104613112), mRNA
EVM0006796	Dispersed	-	TYRAAT(ADH)	Arogenate and phenylpyruvate pathway	K15227|6.5607e-178|pper:PRUPE_ppa006640mg|hypothetical protein; K15227 arogenate dehydrogenase (NADP+), plant [EC:1.3.1.78] (A)	Molecular Function: prephenate dehydrogenase (NADP+) activity (GO:0004665);; Biological Process: tyrosine biosynthetic process (GO:0006571);; Molecular Function: prephenate dehydrogenase activity (GO:0008977);; Biological Process: oxidation-reduction process (GO:0055114);;	Prephenate dehydrogenase	Arogenate dehydrogenase 2, chloroplastic (Precursor) GN=TYRAAT2 OS=Arabidopsis thaliana (Mouse-ear cress) PE=1 SV=1	PREDICTED: arogenate dehydrogenase 2, chloroplastic-like [Nelumbo nucifera]	PREDICTED: Nelumbo nucifera arogenate dehydrogenase 2, chloroplastic-like (LOC104592542), mRNA
EVM0018501	WGD or Segmental	-	TYRAAT(ADH)	Arogenate and phenylpyruvate pathway	K15227|6.59081e-175|atr:s00021p00070600|AMTR_s00021p00070600; hypothetical protein; K15227 arogenate dehydrogenase (NADP+), plant [EC:1.3.1.78] (A)	Molecular Function: prephenate dehydrogenase (NADP+) activity (GO:0004665);; Cellular Component: mitochondrion (GO:0005739);; Biological Process: tyrosine biosynthetic process (GO:0006571);; Molecular Function: prephenate dehydrogenase activity (GO:0008977);; Cellular Component: chloroplast (GO:0009507);; Biological Process: oxidation-reduction process (GO:0055114);;	Prephenate dehydrogenase	Arogenate dehydrogenase 2, chloroplastic (Precursor) GN=TYRAAT2 OS=Arabidopsis thaliana (Mouse-ear cress) PE=1 SV=1	PREDICTED: arogenate dehydrogenase 2, chloroplastic-like [Nelumbo nucifera]	PREDICTED: Nelumbo nucifera arogenate dehydrogenase 2, chloroplastic-like (LOC104613112), mRNA
EVM0019950	Dispersed	-	TAT	Arogenate and phenylpyruvate pathway	K00815|0|mus:103999327|nicotianamine aminotransferase A-like; K00815 tyrosine aminotransferase [EC:2.6.1.5] (A)	Biological Process: cellular amino acid metabolic process (GO:0006520);; Molecular Function: transaminase activity (GO:0008483);; Biological Process: biosynthetic process (GO:0009058);; Molecular Function: pyridoxal phosphate binding (GO:0030170);;	Aminotransferase class I and II	Probable aminotransferase TAT2 GN=At5g53970 OS=Arabidopsis thaliana (Mouse-ear cress) PE=2 SV=1	PREDICTED: probable aminotransferase TAT2 isoform X1 [Nelumbo nucifera]	PREDICTED: Nelumbo nucifera probable aminotransferase TAT2 (LOC104592560), transcript variant X1, mRNA
EVM0002549	WGD or Segmental	-	TAT	Arogenate and phenylpyruvate pathway	K00815|0|mus:103999327|nicotianamine aminotransferase A-like; K00815 tyrosine aminotransferase [EC:2.6.1.5] (A)	Biological Process: cellular amino acid metabolic process (GO:0006520);; Molecular Function: transaminase activity (GO:0008483);; Biological Process: biosynthetic process (GO:0009058);; Molecular Function: pyridoxal phosphate binding (GO:0030170);;	Aminotransferase class I and II	Probable aminotransferase TAT2 GN=At5g53970 OS=Arabidopsis thaliana (Mouse-ear cress) PE=2 SV=1	PREDICTED: probable aminotransferase TAT2 [Nelumbo nucifera]	PREDICTED: Nelumbo nucifera probable aminotransferase TAT2 (LOC104592560), transcript variant X1, mRNA
EVM0018100	WGD or Segmental	grey60	TAT	Arogenate and phenylpyruvate pathway	K00815|0|vvi:100253895|tyrosine aminotransferase; K00815 tyrosine aminotransferase [EC:2.6.1.5] (A)	Biological Process: cellular amino acid metabolic process (GO:0006520);; Molecular Function: transaminase activity (GO:0008483);; Biological Process: biosynthetic process (GO:0009058);; Molecular Function: pyridoxal phosphate binding (GO:0030170);;	Aminotransferase class I and II	Tyrosine aminotransferase GN=TAT OS=Arabidopsis thaliana (Mouse-ear cress) PE=2 SV=1	PREDICTED: probable aminotransferase TAT2 [Nelumbo nucifera]	PREDICTED: Nelumbo nucifera probable aminotransferase TAT2 (LOC104592560), transcript variant X1, mRNA
EVM0010137	WGD or Segmental	grey60	TAT	Arogenate and phenylpyruvate pathway	K00815|0|vvi:100253895|tyrosine aminotransferase; K00815 tyrosine aminotransferase [EC:2.6.1.5] (A)	Biological Process: cellular amino acid metabolic process (GO:0006520);; Molecular Function: transaminase activity (GO:0008483);; Biological Process: biosynthetic process (GO:0009058);; Molecular Function: pyridoxal phosphate binding (GO:0030170);;	Aminotransferase class I and II	Probable aminotransferase TAT2 GN=At5g53970 OS=Arabidopsis thaliana (Mouse-ear cress) PE=2 SV=1	PREDICTED: probable aminotransferase TAT2 [Nelumbo nucifera]	Papaver somniferum clone 10988.C4 PLP-dependent aminotransferase mRNA, complete cds
EVM0012020	Dispersed	brown	ASP5	Arogenate and phenylpyruvate pathway	K00811|0|pop:POPTR_0006s27650g|POPTRDRAFT_654206; aspartate aminotransferase 2 family protein; K00811 aspartate aminotransferase, chloroplastic [EC:2.6.1.1] (A)	Molecular Function: L-aspartate:2-oxoglutarate aminotransferase activity (GO:0004069);; Biological Process: cellular amino acid metabolic process (GO:0006520);; Biological Process: response to cold (GO:0009409);; Cellular Component: chloroplast stroma (GO:0009570);; Biological Process: ethylene biosynthetic process (GO:0009693);; Cellular Component: chloroplast envelope (GO:0009941);; Cellular Co…	Aminotransferase class I and II	Aspartate aminotransferase, chloroplastic (Precursor) GN=F10N7.200 OS=Arabidopsis thaliana (Mouse-ear cress) PE=1 SV=2	aspartate aminotransferase 2 family protein [Populus trichocarpa]	PREDICTED: Nelumbo nucifera aspartate aminotransferase, chloroplastic (LOC104589052), mRNA
EVM0014497	Dispersed	-	hisC	Arogenate and phenylpyruvate pathway	K00817|0|pxb:103956391|histidinol-phosphate aminotransferase, chloroplastic-like; K00817 histidinol-phosphate aminotransferase [EC:2.6.1.9] (A)	Biological Process: histidine biosynthetic process (GO:0000105);; Molecular Function: histidinol-phosphate transaminase activity (GO:0004400);; Molecular Function: pyridoxal phosphate binding (GO:0030170);; Molecular Function: L-phenylalanine:2-oxoglutarate aminotransferase activity (GO:0080130);;	Aminotransferase class I and II	Histidinol-phosphate aminotransferase, chloroplastic (Precursor) GN=HPA OS=Nicotiana tabacum (Common tobacco) PE=2 SV=1	PREDICTED: histidinol-phosphate aminotransferase, chloroplastic-like [Pyrus x bretschneideri]	PREDICTED: Vitis vinifera histidinol-phosphate aminotransferase, chloroplastic-like (LOC100255576), transcript variant X3, mRNA
EVM0008832	Dispersed	-	hisC	Arogenate and phenylpyruvate pathway	K00817|0|rcu:RCOM_0785090|histidinol-phosphate aminotransferase, putative (EC:2.6.1.9); K00817 histidinol-phosphate aminotransferase [EC:2.6.1.9] (A)	Biological Process: histidine biosynthetic process (GO:0000105);; Molecular Function: histidinol-phosphate transaminase activity (GO:0004400);; Molecular Function: pyridoxal phosphate binding (GO:0030170);; Molecular Function: L-phenylalanine:2-oxoglutarate aminotransferase activity (GO:0080130);;	Aminotransferase class I and II	Histidinol-phosphate aminotransferase, chloroplastic (Precursor) GN=HPA OS=Nicotiana tabacum (Common tobacco) PE=2 SV=1	histidinol-phosphate aminotransferase, putative [Ricinus communis]	PREDICTED: Nelumbo nucifera histidinol-phosphate aminotransferase, chloroplastic-like (LOC104588574), transcript variant X4, mRNA
EVM0007064	Dispersed	skyblue	GOT1	Arogenate and phenylpyruvate pathway	K14454|0|tcc:TCM_037152|Aspartate aminotransferase 3; K14454 aspartate aminotransferase, cytoplasmic [EC:2.6.1.1] (A)	Molecular Function: L-aspartate:2-oxoglutarate aminotransferase activity (GO:0004069);; Molecular Function: copper ion binding (GO:0005507);; Cellular Component: cell wall (GO:0005618);; Cellular Component: peroxisome (GO:0005777);; Cellular Component: cytosol (GO:0005829);; Cellular Component: plasma membrane (GO:0005886);; Biological Process: cellular amino acid metabolic process (GO:0006520);;…	Aminotransferase class I and II	Aspartate aminotransferase, cytoplasmic OS=Daucus carota (Wild carrot) PE=2 SV=1	PREDICTED: aspartate aminotransferase, cytoplasmic, partial [Nelumbo nucifera]	PREDICTED: Nelumbo nucifera aspartate aminotransferase, cytoplasmic (LOC104592600), partial mRNA
EVM0008507	Dispersed	brown	GOT2	Arogenate and phenylpyruvate pathway	K14455|0|vvi:100243028|aspartate aminotransferase, mitochondrial; K14455 aspartate aminotransferase, mitochondrial [EC:2.6.1.1] (A)	Molecular Function: L-aspartate:2-oxoglutarate aminotransferase activity (GO:0004069);; Molecular Function: copper ion binding (GO:0005507);; Cellular Component: mitochondrion (GO:0005739);; Biological Process: cellular amino acid metabolic process (GO:0006520);; Biological Process: biosynthetic process (GO:0009058);; Molecular Function: pyridoxal phosphate binding (GO:0030170);; Biological Proce…	Aminotransferase class I and II	Aspartate aminotransferase, mitochondrial (Precursor) GN=ASP1 OS=Arabidopsis thaliana (Mouse-ear cress) PE=1 SV=1	PREDICTED: aspartate aminotransferase, mitochondrial-like [Nelumbo nucifera]	PREDICTED: Nelumbo nucifera aspartate aminotransferase, mitochondrial-like (LOC104602468), mRNA
EVM0000841	Dispersed	brown	GOT2	Arogenate and phenylpyruvate pathway	K14455|0|vvi:100254127|aspartate aminotransferase, mitochondrial; K14455 aspartate aminotransferase, mitochondrial [EC:2.6.1.1] (A)	Molecular Function: L-aspartate:2-oxoglutarate aminotransferase activity (GO:0004069);; Molecular Function: copper ion binding (GO:0005507);; Biological Process: cellular amino acid metabolic process (GO:0006520);; Biological Process: pyrimidine ribonucleotide biosynthetic process (GO:0009220);; Molecular Function: pyridoxal phosphate binding (GO:0030170);; Molecular Function: L-phenylalanine:2-o…	Aminotransferase class I and II	Aspartate aminotransferase, mitochondrial (Precursor) GN=ASP1 OS=Arabidopsis thaliana (Mouse-ear cress) PE=1 SV=1	PREDICTED: aspartate aminotransferase, mitochondrial [Nelumbo nucifera]	PREDICTED: Nelumbo nucifera aspartate aminotransferase, mitochondrial (LOC104589736), mRNA
EVM0017924	Dispersed	-	PAL	Phenylpropanoid pathway	K10775|1.55255e-179|rcu:RCOM_0262230|Phenylalanine ammonia-lyase, putative (EC:4.3.1.24); K10775 phenylalanine ammonia-lyase [EC:4.3.1.24] (A)	Cellular Component: cytoplasm (GO:0005737);; Biological Process: L-phenylalanine catabolic process (GO:0006559);; Biological Process: cinnamic acid biosynthetic process (GO:0009800);; Molecular Function: phenylalanine ammonia-lyase activity (GO:0045548);;	Aromatic amino acid lyase	Phenylalanine ammonia-lyase (Fragment) GN=PAL OS=Vitis vinifera (Grape) PE=2 SV=1	RecName: Full=Phenylalanine ammonia-lyase, partial [Vitis vinifera]	Camellia sinensis phenylalanine ammonia-lyase mRNA, complete cds
EVM0017674	Dispersed	-	PAL	Phenylpropanoid pathway	K10775|5.41701e-161|pop:POPTR_0008s03810g|POPTRDRAFT_820249; phenylalanine ammonia-lyase family protein; K10775 phenylalanine ammonia-lyase [EC:4.3.1.24] (A)	Cellular Component: cytoplasm (GO:0005737);; Biological Process: L-phenylalanine catabolic process (GO:0006559);; Biological Process: cinnamic acid biosynthetic process (GO:0009800);; Molecular Function: phenylalanine ammonia-lyase activity (GO:0045548);;	Aromatic amino acid lyase	Phenylalanine ammonia-lyase G4 (Fragment) GN=PALG4 OS=Populus kitakamiensis (Aspen) PE=3 SV=1	putative phenylalanine ammonia-lyase [Fagus sylvatica]	PREDICTED: Nelumbo nucifera phenylalanine ammonia-lyase (LOC104601277), mRNA
EVM0013218	WGD or Segmental	grey60	PAL	Phenylpropanoid pathway	K10775|0|rcu:RCOM_0262230|Phenylalanine ammonia-lyase, putative (EC:4.3.1.24); K10775 phenylalanine ammonia-lyase [EC:4.3.1.24] (A)	Cellular Component: cytoplasm (GO:0005737);; Biological Process: L-phenylalanine catabolic process (GO:0006559);; Biological Process: cinnamic acid biosynthetic process (GO:0009800);; Molecular Function: phenylalanine ammonia-lyase activity (GO:0045548);;	Aromatic amino acid lyase	Phenylalanine ammonia-lyase GN=PAL OS=Camellia sinensis (Tea) PE=2 SV=1	PREDICTED: phenylalanine ammonia-lyase [Nelumbo nucifera]	Prunus persica phenylalanine ammonia lyase (PAL) mRNA, complete cds
EVM0015158	WGD or Segmental	grey60	PAL	Phenylpropanoid pathway	K10775|0|vvi:100241377|phenylalanine ammonia-lyase; K10775 phenylalanine ammonia-lyase [EC:4.3.1.24] (A)	Cellular Component: cytoplasm (GO:0005737);; Biological Process: L-phenylalanine catabolic process (GO:0006559);; Biological Process: cinnamic acid biosynthetic process (GO:0009800);; Molecular Function: phenylalanine ammonia-lyase activity (GO:0045548);;	Aromatic amino acid lyase	Phenylalanine ammonia-lyase GN=PAL OS=Camellia sinensis (Tea) PE=2 SV=1	PREDICTED: phenylalanine ammonia-lyase [Nelumbo nucifera]	Sinopodophyllum hexandrum phenylalanine ammonia-lyase mRNA, complete cds
EVM0002982	WGD or Segmental	darkseagreen4	PAL	Phenylpropanoid pathway	K10775|0|vvi:100854997|phenylalanine ammonia-lyase-like; K10775 phenylalanine ammonia-lyase [EC:4.3.1.24] (A)	Cellular Component: cytoplasm (GO:0005737);; Biological Process: L-phenylalanine catabolic process (GO:0006559);; Biological Process: cinnamic acid biosynthetic process (GO:0009800);; Molecular Function: phenylalanine ammonia-lyase activity (GO:0045548);;	Aromatic amino acid lyase	Phenylalanine ammonia-lyase GN=PAL OS=Camellia sinensis (Tea) PE=2 SV=1	PREDICTED: phenylalanine ammonia-lyase [Nelumbo nucifera]	PREDICTED: Nelumbo nucifera phenylalanine ammonia-lyase (LOC104601277), mRNA
EVM0005690	Dispersed	-	4CL	Phenylpropanoid pathway	K01904|0|pper:PRUPE_ppa003893mg|hypothetical protein; K01904 4-coumarate'-CoA ligase [EC:6.2.1.12] (A)	Molecular Function: fatty-acyl-CoA synthase activity (GO:0004321);; Cellular Component: peroxisome (GO:0005777);; Biological Process: jasmonic acid biosynthetic process (GO:0009695);; Molecular Function: 4-coumarate-CoA ligase activity (GO:0016207);; Molecular Function: Photinus-luciferin 4-monooxygenase (ATP-hydrolyzing) activity (GO:0047077);; Biological Process: oxidation-reduction process (GO…	AMP-binding enzyme	4-coumarate'-CoA ligase-like 7 GN=4CLL7 OS=Arabidopsis thaliana (Mouse-ear cress) PE=1 SV=1	PREDICTED: 4-coumarate'-CoA ligase-like 7 [Nelumbo nucifera]	PREDICTED: Nelumbo nucifera 4-coumarate'-CoA ligase-like 7 (LOC104604518), mRNA
EVM0023774	Dispersed	grey60	4CL	Phenylpropanoid pathway	K01904|0|sot:102584603|4-coumarate'-CoA ligase 2-like; K01904 4-coumarate'-CoA ligase [EC:6.2.1.12] (A)	Molecular Function: ATP binding (GO:0005524);; Biological Process: phenylpropanoid metabolic process (GO:0009698);; Molecular Function: 4-coumarate-CoA ligase activity (GO:0016207);; Molecular Function: Photinus-luciferin 4-monooxygenase (ATP-hydrolyzing) activity (GO:0047077);; Biological Process: oxidation-reduction process (GO:0055114);;	AMP-binding enzyme	4-coumarate'-CoA ligase 1 GN=4CL1 OS=Nicotiana tabacum (Common tobacco) PE=2 SV=1	PREDICTED: 4-coumarate'-CoA ligase 2-like [Nelumbo nucifera]	PREDICTED: Nelumbo nucifera 4-coumarate'-CoA ligase 2-like (LOC104603180), mRNA
EVM0022855	Dispersed	-	4CL	Phenylpropanoid pathway	K01904|0|tcc:TCM_008770|AMP dependent CoA ligase, putative; K01904 4-coumarate'-CoA ligase [EC:6.2.1.12] (A)	Biological Process: long-chain fatty acid metabolic process (GO:0001676);; Molecular Function: long-chain fatty acid-CoA ligase activity (GO:0004467);; Cellular Component: cytoplasm (GO:0005737);; Molecular Function: 4-coumarate-CoA ligase activity (GO:0016207);; Molecular Function: medium-chain fatty acid-CoA ligase activity (GO:0031956);; Biological Process: fatty-acyl-CoA biosynthetic process …	AMP-binding enzyme	4-coumarate'-CoA ligase-like 1 GN=4CLL1 OS=Arabidopsis thaliana (Mouse-ear cress) PE=2 SV=1	PREDICTED: 4-coumarate'-CoA ligase-like 1 [Nelumbo nucifera]	PREDICTED: Nelumbo nucifera 4-coumarate'-CoA ligase-like 1 (LOC104612676), mRNA
EVM0001283	WGD or Segmental	-	4CL	Phenylpropanoid pathway	K01904|0|tcc:TCM_025459|4-coumarate:CoA ligase 3; K01904 4-coumarate'-CoA ligase [EC:6.2.1.12] (A)	Biological Process: phenylpropanoid metabolic process (GO:0009698);; Biological Process: anthocyanin-containing compound biosynthetic process (GO:0009718);; Biological Process: response to sucrose (GO:0009744);; Biological Process: response to UV-B (GO:0010224);; Biological Process: pollen exine formation (GO:0010584);; Molecular Function: 4-coumarate-CoA ligase activity (GO:0016207);; Molecular …	AMP-binding enzyme	4-coumarate'-CoA ligase 2 OS=Glycine max (Soybean) PE=2 SV=2	PREDICTED: 4-coumarate'-CoA ligase 2 isoform X1 [Nelumbo nucifera]	PREDICTED: Nelumbo nucifera 4-coumarate'-CoA ligase 2 (LOC104600350), transcript variant X1, mRNA
EVM0011793	WGD or Segmental	grey60	4CL	Phenylpropanoid pathway	K01904|0|tcc:TCM_025459|4-coumarate:CoA ligase 3; K01904 4-coumarate'-CoA ligase [EC:6.2.1.12] (A)	Biological Process: phenylpropanoid metabolic process (GO:0009698);; Biological Process: anthocyanin-containing compound biosynthetic process (GO:0009718);; Biological Process: response to sucrose (GO:0009744);; Biological Process: response to UV-B (GO:0010224);; Biological Process: pollen exine formation (GO:0010584);; Molecular Function: 4-coumarate-CoA ligase activity (GO:0016207);; Molecular …	AMP-binding enzyme	4-coumarate'-CoA ligase 2 OS=Glycine max (Soybean) PE=2 SV=2	PREDICTED: 4-coumarate'-CoA ligase 2 isoform X1 [Nelumbo nucifera]	PREDICTED: Nelumbo nucifera 4-coumarate'-CoA ligase 2 (LOC104600350), transcript variant X1, mRNA
EVM0005009	Dispersed	darkseagreen4	4CL	Phenylpropanoid pathway	K01904|0|vvi:100261471|4-coumarate'-CoA ligase-like 6; K01904 4-coumarate'-CoA ligase [EC:6.2.1.12] (A)	Biological Process: autophagy (GO:0006914);; Biological Process: response to symbiotic fungus (GO:0009610);; Molecular Function: 4-coumarate-CoA ligase activity (GO:0016207);;	AMP-binding enzyme	4-coumarate'-CoA ligase-like 6 GN=4CLL6 OS=Arabidopsis thaliana (Mouse-ear cress) PE=2 SV=2	PREDICTED: 4-coumarate'-CoA ligase-like 6 [Nelumbo nucifera]	PREDICTED: Nelumbo nucifera 4-coumarate'-CoA ligase-like 6 (LOC104600409), mRNA
EVM0016571	Dispersed	-	CYP73A	Phenylpropanoid pathway	K00487|0|gmx:100812188|trans-cinnamate 4-monooxygenase-like; K00487 trans-cinnamate 4-monooxygenase [EC:1.14.13.11] (A)	Molecular Function: iron ion binding (GO:0005506);; Molecular Function: electron carrier activity (GO:0009055);; Molecular Function: trans-cinnamate 4-monooxygenase activity (GO:0016710);; Molecular Function: heme binding (GO:0020037);; Biological Process: oxidation-reduction process (GO:0055114);;	Cytochrome P450	Cytochrome P450 CYP73A100 OS=Panax ginseng (Korean ginseng) PE=2 SV=1	PREDICTED: cytochrome P450 CYP73A100-like [Nelumbo nucifera]	PREDICTED: Nelumbo nucifera cytochrome P450 CYP73A100-like (LOC104601639), mRNA
EVM0006355	WGD or Segmental	skyblue	CYP73A	Phenylpropanoid pathway	K00487|0|tcc:TCM_045554|Cinnamate-4-hydroxylase; K00487 trans-cinnamate 4-monooxygenase [EC:1.14.13.11] (A)	Molecular Function: iron ion binding (GO:0005506);; Cellular Component: endoplasmic reticulum (GO:0005783);; Cellular Component: plasma membrane (GO:0005886);; Molecular Function: electron carrier activity (GO:0009055);; Biological Process: response to light stimulus (GO:0009416);; Cellular Component: plant-type cell wall (GO:0009505);; Biological Process: pollen development (GO:0009555);; Biolog…	Cytochrome P450	Trans-cinnamate 4-monooxygenase GN=CYP73A1 OS=Helianthus tuberosus (Jerusalem artichoke) PE=1 SV=1	PREDICTED: trans-cinnamate 4-monooxygenase [Nelumbo nucifera]	PREDICTED: Nelumbo nucifera trans-cinnamate 4-monooxygenase (LOC104594470), mRNA
EVM0019971	WGD or Segmental	darkseagreen4	CYP73A	Phenylpropanoid pathway	K00487|0|tcc:TCM_045554|Cinnamate-4-hydroxylase; K00487 trans-cinnamate 4-monooxygenase [EC:1.14.13.11] (A)	Molecular Function: monooxygenase activity (GO:0004497);; Molecular Function: iron ion binding (GO:0005506);; Molecular Function: electron carrier activity (GO:0009055);; Molecular Function: oxidoreductase activity, acting on paired donors, with incorporation or reduction of molecular oxygen (GO:0016705);; Molecular Function: heme binding (GO:0020037);; Biological Process: oxidation-reduction pro…	Cytochrome P450	Trans-cinnamate 4-monooxygenase GN=CYP73A11 OS=Glycine max (Soybean) PE=2 SV=1	PREDICTED: trans-cinnamate 4-monooxygenase [Nelumbo nucifera]	PREDICTED: Nelumbo nucifera trans-cinnamate 4-monooxygenase (LOC104594470), mRNA
EVM0018612	WGD or Segmental	-	CCOAMT	Flavonoids biosynthesis pathway	K00588|1.12599e-172|vvi:100243978|caffeoyl-CoA O-methyltransferase; K00588 caffeoyl-CoA O-methyltransferase [EC:2.1.1.104] (A)	Cellular Component: cytosol (GO:0005829);; Biological Process: polyamine catabolic process (GO:0006598);; Biological Process: response to wounding (GO:0009611);; Biological Process: coumarin biosynthetic process (GO:0009805);; Biological Process: lignin biosynthetic process (GO:0009809);; Biological Process: positive regulation of flavonoid biosynthetic process (GO:0009963);; Biological Process: …	O-methyltransferase	Caffeoyl-CoA O-methyltransferase OS=Populus tremuloides (Quaking aspen) PE=2 SV=1	RecName: Full=Caffeoyl-CoA O-methyltransferase; AltName: Full=Trans-caffeoyl-CoA 3-O-methyltransferase; Short=CCoAMT; Short=CCoAOMT [Populus tremuloides]	Vitis vinifera caffeoyl-CoA O-methyltransferase (LOC100233087), mRNA >gi|1000518|emb|Z54233.1| V.vinifera mRNA for caffeoyl-CoA O-methyltransferase
EVM0013303	WGD or Segmental	grey60	CCOAMT	Flavonoids biosynthesis pathway	K00588|4.51722e-172|vvi:100243978|caffeoyl-CoA O-methyltransferase; K00588 caffeoyl-CoA O-methyltransferase [EC:2.1.1.104] (A)	Cellular Component: cytosol (GO:0005829);; Biological Process: polyamine catabolic process (GO:0006598);; Biological Process: response to wounding (GO:0009611);; Biological Process: coumarin biosynthetic process (GO:0009805);; Biological Process: lignin biosynthetic process (GO:0009809);; Biological Process: positive regulation of flavonoid biosynthetic process (GO:0009963);; Biological Process: …	O-methyltransferase	Caffeoyl-CoA O-methyltransferase OS=Populus tremuloides (Quaking aspen) PE=2 SV=1	PREDICTED: caffeoyl-CoA O-methyltransferase [Vitis vinifera]	Vitis vinifera caffeoyl-CoA O-methyltransferase (LOC100233087), mRNA >gi|1000518|emb|Z54233.1| V.vinifera mRNA for caffeoyl-CoA O-methyltransferase
EVM0022343	Tandem	grey60	HCT	Flavonoids biosynthesis pathway	K13065|0|tcc:TCM_027499|Hydroxycinnamoyl-CoA shikimate/quinate hydroxycinnamoyl transferase isoform 1; K13065 shikimate O-hydroxycinnamoyltransferase [EC:2.3.1.133] (A)	Biological Process: response to stress (GO:0006950);; Biological Process: phenylpropanoid biosynthetic process (GO:0009699);; Biological Process: single-organism cellular process (GO:0044763);; Molecular Function: O-hydroxycinnamoyltransferase activity (GO:0050737);; Biological Process: regulation of biological process (GO:0050789);;	Transferase family	Shikimate O-hydroxycinnamoyltransferase GN=HST OS=Nicotiana tabacum (Common tobacco) PE=1 SV=1	PREDICTED: shikimate O-hydroxycinnamoyltransferase-like [Nelumbo nucifera]	Sinopodophyllum hexandrum hydroxycinnamoyl transferase mRNA, complete cds
EVM0000963	WGD or Segmental	-	HCT	Flavonoids biosynthesis pathway	K13065|0|vvi:100265530|shikimate O-hydroxycinnamoyltransferase; K13065 shikimate O-hydroxycinnamoyltransferase [EC:2.3.1.133] (A)	Cellular Component: cytosol (GO:0005829);; Biological Process: protein targeting to membrane (GO:0006612);; Biological Process: response to wounding (GO:0009611);; Biological Process: coumarin biosynthetic process (GO:0009805);; Biological Process: lignin biosynthetic process (GO:0009809);; Biological Process: positive regulation of flavonoid biosynthetic process (GO:0009963);; Biological Process…	Transferase family	Shikimate O-hydroxycinnamoyltransferase GN=HST OS=Nicotiana tabacum (Common tobacco) PE=1 SV=1	PREDICTED: shikimate O-hydroxycinnamoyltransferase [Vitis vinifera]	Theobroma cacao Hydroxycinnamoyl-CoA shikimate/quinate hydroxycinnamoyl transferase isoform 1 (TCM_027499) mRNA, complete cds
EVM0010984	Tandem	-	HCT	Flavonoids biosynthesis pathway	K13065|0|vvi:100265530|shikimate O-hydroxycinnamoyltransferase; K13065 shikimate O-hydroxycinnamoyltransferase [EC:2.3.1.133] (A)	Biological Process: response to stress (GO:0006950);; Biological Process: phenylpropanoid biosynthetic process (GO:0009699);; Biological Process: single-organism cellular process (GO:0044763);; Molecular Function: O-hydroxycinnamoyltransferase activity (GO:0050737);; Biological Process: regulation of biological process (GO:0050789);;	Transferase family	Shikimate O-hydroxycinnamoyltransferase GN=HST OS=Nicotiana tabacum (Common tobacco) PE=1 SV=1	PREDICTED: shikimate O-hydroxycinnamoyltransferase-like [Nelumbo nucifera]	Sinopodophyllum hexandrum hydroxycinnamoyl transferase mRNA, complete cds
EVM0015438	WGD or Segmental	darkseagreen4	HCT	Flavonoids biosynthesis pathway	K13065|0|vvi:100265530|shikimate O-hydroxycinnamoyltransferase; K13065 shikimate O-hydroxycinnamoyltransferase [EC:2.3.1.133] (A)	Biological Process: response to stress (GO:0006950);; Biological Process: phenylpropanoid biosynthetic process (GO:0009699);; Biological Process: single-organism cellular process (GO:0044763);; Molecular Function: O-hydroxycinnamoyltransferase activity (GO:0050737);; Biological Process: regulation of biological process (GO:0050789);;	Transferase family	Shikimate O-hydroxycinnamoyltransferase GN=HST OS=Nicotiana tabacum (Common tobacco) PE=1 SV=1	PREDICTED: shikimate O-hydroxycinnamoyltransferase-like [Nelumbo nucifera]	Sinopodophyllum hexandrum hydroxycinnamoyl transferase mRNA, complete cds
EVM0012325	Tandem	-	HCT	Flavonoids biosynthesis pathway	K13065|0|vvi:100265530|shikimate O-hydroxycinnamoyltransferase; K13065 shikimate O-hydroxycinnamoyltransferase [EC:2.3.1.133] (A)	Biological Process: response to stress (GO:0006950);; Biological Process: phenylpropanoid biosynthetic process (GO:0009699);; Biological Process: single-organism cellular process (GO:0044763);; Molecular Function: O-hydroxycinnamoyltransferase activity (GO:0050737);; Biological Process: regulation of biological process (GO:0050789);;	Transferase family	Shikimate O-hydroxycinnamoyltransferase GN=HST OS=Nicotiana tabacum (Common tobacco) PE=1 SV=1	PREDICTED: shikimate O-hydroxycinnamoyltransferase-like [Nelumbo nucifera]	Sinopodophyllum hexandrum hydroxycinnamoyl transferase mRNA, complete cds
EVM0014468	Dispersed	darkseagreen4	HCT	Flavonoids biosynthesis pathway	K13065|3.28519e-162|vvi:100246835|spermidine hydroxycinnamoyl transferase-like; K13065 shikimate O-hydroxycinnamoyltransferase [EC:2.3.1.133] (A)	Molecular Function: N-acyltransferase activity (GO:0016410);;	Transferase family	Spermidine hydroxycinnamoyl transferase GN=SHT OS=Arabidopsis thaliana (Mouse-ear cress) PE=1 SV=1	PREDICTED: spermidine hydroxycinnamoyl transferase [Nelumbo nucifera]	PREDICTED: Nelumbo nucifera spermidine hydroxycinnamoyl transferase (LOC104603237), mRNA
EVM0023789	Tandem	darkseagreen4	CYP98A	Flavonoids biosynthesis pathway	K09754|0|pop:POPTR_0006s03180g|POPTRDRAFT_685839; Cytochrome P450 98A3 family protein; K09754 coumaroylquinate(coumaroylshikimate) 3'-monooxygenase [EC:1.14.13.36] (A)	Molecular Function: iron ion binding (GO:0005506);; Molecular Function: electron carrier activity (GO:0009055);; Molecular Function: flavonoid 3'-monooxygenase activity (GO:0016711);; Molecular Function: heme binding (GO:0020037);; Biological Process: oxidation-reduction process (GO:0055114);;	Cytochrome P450	Cytochrome P450 98A2 GN=CYP98A2 OS=Glycine max (Soybean) PE=2 SV=1	Cytochrome P450 98A3 family protein [Populus trichocarpa]	Sinopodophyllum hexandrum CYP98A68 mRNA, complete cds
EVM0017115	WGD or Segmental	grey60	CYP98A	Flavonoids biosynthesis pathway	K09754|0|pop:POPTR_0006s03180g|POPTRDRAFT_685839; Cytochrome P450 98A3 family protein; K09754 coumaroylquinate(coumaroylshikimate) 3'-monooxygenase [EC:1.14.13.36] (A)	Molecular Function: iron ion binding (GO:0005506);; Molecular Function: electron carrier activity (GO:0009055);; Molecular Function: flavonoid 3'-monooxygenase activity (GO:0016711);; Molecular Function: heme binding (GO:0020037);; Biological Process: oxidation-reduction process (GO:0055114);;	Cytochrome P450	Cytochrome P450 98A2 GN=CYP98A2 OS=Glycine max (Soybean) PE=2 SV=1	cytochrome P450 [Coptis japonica var. dissecta]	Sinopodophyllum hexandrum CYP98A68 mRNA, complete cds
EVM0023191	WGD or Segmental	brown4	CYP98A	Flavonoids biosynthesis pathway	K09754|0|pop:POPTR_0006s03180g|POPTRDRAFT_685839; Cytochrome P450 98A3 family protein; K09754 coumaroylquinate(coumaroylshikimate) 3'-monooxygenase [EC:1.14.13.36] (A)	Molecular Function: iron ion binding (GO:0005506);; Molecular Function: electron carrier activity (GO:0009055);; Molecular Function: flavonoid 3'-monooxygenase activity (GO:0016711);; Molecular Function: heme binding (GO:0020037);; Biological Process: oxidation-reduction process (GO:0055114);;	Cytochrome P450	Cytochrome P450 98A2 GN=CYP98A2 OS=Glycine max (Soybean) PE=2 SV=1	putative p-coumarate 3-hydroxylase [Epimedium sagittatum]	Coptis japonica var. dissecta CYP98A46 mRNA for cytochrome P450, complete cds
EVM0010112	Dispersed	brown	CHS	Flavonoids biosynthesis pathway	K00660|0|vvi:100258106|CHS3; chalcone synthase; K00660 chalcone synthase [EC:2.3.1.74] (A)	Cellular Component: nucleus (GO:0005634);; Cellular Component: endoplasmic reticulum (GO:0005783);; Biological Process: response to oxidative stress (GO:0006979);; Biological Process: response to wounding (GO:0009611);; Biological Process: response to gravity (GO:0009629);; Cellular Component: plant-type vacuole membrane (GO:0009705);; Biological Process: chalcone biosynthetic process (GO:0009715…	Chalcone and stilbene synthases, N-terminal domain	Chalcone synthase 2 GN=CHS2 OS=Camellia sinensis (Tea) PE=2 SV=1	naringenin-chalcone synthase [Juglans nigra x Juglans regia]	Akebia quinata CHS6 gene, partial cds
EVM0015408	Tandem	-	CHS	Flavonoids biosynthesis pathway	K00660|0|vvi:100263443|CHS; chalcone synthase (EC:2.3.1.74); K00660 chalcone synthase [EC:2.3.1.74] (A)	Biological Process: flavonoid biosynthetic process (GO:0009813);; Molecular Function: naringenin-chalcone synthase activity (GO:0016210);;	Chalcone and stilbene synthases, N-terminal domain	Chalcone synthase GN=CHS OS=Vitis vinifera (Grape) PE=2 SV=1	chalcone synthase [Vitis vinifera]	Holboellia latifolia CHS2 gene, partial cds
EVM0020245	WGD or Segmental	-	CHS	Flavonoids biosynthesis pathway	K00660|0|vvi:100263443|CHS; chalcone synthase (EC:2.3.1.74); K00660 chalcone synthase [EC:2.3.1.74] (A)	Biological Process: flavonoid biosynthetic process (GO:0009813);; Molecular Function: naringenin-chalcone synthase activity (GO:0016210);;	Chalcone and stilbene synthases, N-terminal domain	Chalcone synthase GN=CHS OS=Vitis vinifera (Grape) PE=2 SV=1	chalcone synthase [Vitis vinifera]	Akebia quinata CHS1 gene, partial cds
EVM0011445	WGD or Segmental	brown4	CHS	Flavonoids biosynthesis pathway	K00660|0|vvi:100263443|CHS; chalcone synthase (EC:2.3.1.74); K00660 chalcone synthase [EC:2.3.1.74] (A)	Cellular Component: nucleus (GO:0005634);; Cellular Component: endoplasmic reticulum (GO:0005783);; Biological Process: response to oxidative stress (GO:0006979);; Biological Process: response to wounding (GO:0009611);; Biological Process: response to gravity (GO:0009629);; Cellular Component: plant-type vacuole membrane (GO:0009705);; Biological Process: chalcone biosynthetic process (GO:0009715…	Chalcone and stilbene synthases, N-terminal domain	Chalcone synthase GN=CHS OS=Vitis vinifera (Grape) PE=2 SV=1	chalcone synthase [Lonicera japonica]	Euptelea pleiosperma CHS8 gene, partial cds
EVM0017483	Tandem	-	CHS	Flavonoids biosynthesis pathway	K00660|2.42942e-106|vvi:100263443|CHS; chalcone synthase (EC:2.3.1.74); K00660 chalcone synthase [EC:2.3.1.74] (A)	Biological Process: flavonoid biosynthetic process (GO:0009813);; Molecular Function: naringenin-chalcone synthase activity (GO:0016210);;	Chalcone and stilbene synthases, N-terminal domain	Chalcone synthase GN=CHS OS=Vitis vinifera (Grape) PE=2 SV=1	PREDICTED: chalcone synthase G-like [Nelumbo nucifera]	Vitis vinifera clone SS0AEB17YD10
EVM0015959	Dispersed	grey60	CHI	Flavonoids biosynthesis pathway	K01859|4.27925e-113|vvi:100233078|CHI, CHI1, CHI2; chalcone isomerase (EC:5.5.1.6); K01859 chalcone isomerase [EC:5.5.1.6] (A)	Biological Process: flavonoid biosynthetic process (GO:0009813);; Molecular Function: chalcone isomerase activity (GO:0045430);;	Chalcone-flavanone isomerase	Chalcone'-flavonone isomerase GN=CHI OS=Camellia sinensis (Tea) PE=2 SV=2	chalcone isomerase protein, partial [Apium graveolens]	PREDICTED: Nelumbo nucifera chalcone'-flavonone isomerase 2-like (LOC104599237), mRNA
EVM0001533	Dispersed	-	CYP75B1	Flavonoids biosynthesis pathway	K05280|0|vvi:100232999|F3'H, VvF3'h4; flavonoid 3' hydroxylase; K05280 flavonoid 3'-monooxygenase [EC:1.14.13.21] (A)	Molecular Function: iron ion binding (GO:0005506);; Molecular Function: electron carrier activity (GO:0009055);; Molecular Function: flavonoid 3'-monooxygenase activity (GO:0016711);; Molecular Function: heme binding (GO:0020037);; Biological Process: oxidation-reduction process (GO:0055114);;	Cytochrome P450	Flavonoid 3&apos;-monooxygenase GN=CYP75B2 OS=Petunia hybrida (Petunia) PE=2 SV=1	flavonoid 3&apos;-hydroxylase [Epimedium sagittatum]	PREDICTED: Nelumbo nucifera flavonoid 3'-monooxygenase (LOC104598992), mRNA
EVM0001136	Dispersed	-	FLS	Flavonoids biosynthesis pathway	K05278|0|cic:CICLE_v10026028mg|hypothetical protein; K05278 flavonol synthase [EC:1.14.11.23] (A)	Molecular Function: iron ion binding (GO:0005506);; Cellular Component: cytoplasm (GO:0005737);; Molecular Function: oxidoreductase activity, acting on single donors with incorporation of molecular oxygen, incorporation of two atoms of oxygen (GO:0016702);; Molecular Function: L-ascorbic acid binding (GO:0031418);; Molecular Function: flavonol synthase activity (GO:0045431);; Molecular Function: …	non-haem dioxygenase in morphine synthesis N-terminal	Flavonol synthase/flavanone 3-hydroxylase GN=FLS OS=Citrus unshiu (Satsuma mandarin) PE=1 SV=1	flavonol synthase [Epimedium sagittatum]	Epimedium sagittatum flavonol synthase (FLS) mRNA, complete cds
EVM0020322	Dispersed	brown4	LAR	Flavonoids biosynthesis pathway	K13081|5.82181e-173|tcc:TCM_011870|Leucoanthocyanidin reductase 1; K13081 leucoanthocyanidin reductase [EC:1.17.1.3] (A)	Molecular Function: nucleotide binding (GO:0000166);; Molecular Function: leucoanthocyanidin reductase activity (GO:0033788);; Biological Process: oxidation-reduction process (GO:0055114);;	NmrA-like family	Leucoanthocyanidin reductase GN=LAR OS=Desmodium uncinatum (Spanish clover) PE=1 SV=1	PREDICTED: leucoanthocyanidin reductase-like [Nelumbo nucifera]	PREDICTED: Nelumbo nucifera leucoanthocyanidin reductase-like (LOC104601230), mRNA
EVM0010525	Dispersed	-	LAR	Flavonoids biosynthesis pathway	K13081|3.6232e-69|tcc:TCM_011870|Leucoanthocyanidin reductase 1; K13081 leucoanthocyanidin reductase [EC:1.17.1.3] (A)	Molecular Function: nucleotide binding (GO:0000166);; Molecular Function: oxidoreductase activity (GO:0016491);;	NmrA-like family	Leucoanthocyanidin reductase GN=LAR OS=Desmodium uncinatum (Spanish clover) PE=1 SV=1	Leucoanthocyanidin reductase 1 [Theobroma cacao]	PREDICTED: Nelumbo nucifera leucoanthocyanidin reductase-like (LOC104601230), mRNA
EVM0002323	Dispersed	brown4	F3H	Flavonoids biosynthesis pathway	K00475|0|vvi:100233079|F3H, FHT; flavanone 3-hydroxylase (EC:1.14.11.9); K00475 naringenin 3-dioxygenase [EC:1.14.11.9] (A)	Biological Process: flavonoid biosynthetic process (GO:0009813);; Molecular Function: oxidoreductase activity, acting on single donors with incorporation of molecular oxygen, incorporation of two atoms of oxygen (GO:0016702);; Molecular Function: L-ascorbic acid binding (GO:0031418);; Molecular Function: naringenin 3-dioxygenase activity (GO:0045486);; Molecular Function: metal ion binding (GO:00…	non-haem dioxygenase in morphine synthesis N-terminal	Flavanone 3-dioxygenase GN=FHT OS=Petroselinum crispum (Parsley) PE=1 SV=1	flavanone 3-hydroxylase [Ampelopsis grossedentata]	Camellia chekiangoleosa flavanone 3-hydroxylase (F3H) mRNA, complete cds
EVM0022942	Dispersed	brown4	DFR	Flavonoids biosynthesis pathway	K13082|0|vvi:100233141|DFR, dfr1; dihydroflavonol reductase (EC:1.1.1.219); K13082 bifunctional dihydroflavonol 4-reductase/flavanone 4-reductase [EC:1.1.1.219 1.1.1.234] (A)	Molecular Function: nucleotide binding (GO:0000166);; Biological Process: anthocyanin-containing compound biosynthetic process (GO:0009718);; Biological Process: cellular metabolic process (GO:0044237);; Molecular Function: dihydrokaempferol 4-reductase activity (GO:0045552);; Molecular Function: flavanone 4-reductase activity (GO:0047890);; Molecular Function: coenzyme binding (GO:0050662);; Bio…	NAD dependent epimerase/dehydratase family	Dihydroflavonol-4-reductase GN=DFR OS=Vitis vinifera (Grape) PE=1 SV=1	PREDICTED: LOW QUALITY PROTEIN: bifunctional dihydroflavonol 4-reductase/flavanone 4-reductase-like [Nelumbo nucifera]	PREDICTED: Nelumbo nucifera bifunctional dihydroflavonol 4-reductase/flavanone 4-reductase-like (LOC104601829), mRNA
EVM0005744	Proximal	grey60	BZ1	Flavonoids biosynthesis pathway	K12930|3.4505e-174|pop:POPTR_0013s12310g|UDP-glucoronosyl/UDP-glucosyl transferase family protein; K12930 anthocyanidin 3-O-glucosyltransferase [EC:2.4.1.115] (A)	Biological Process: anthocyanin-containing compound biosynthetic process (GO:0009718);; Biological Process: quercetin O-glucoside biosynthetic process (GO:0033303);; Biological Process: kaempferol O-glucoside biosynthetic process (GO:0033330);; Biological Process: cyanidin 3-O-glucoside biosynthetic process (GO:0033485);; Molecular Function: anthocyanidin 3-O-glucosyltransferase activity (GO:0047…	UDP-glucoronosyl and UDP-glucosyl transferase	Anthocyanidin 3-O-glucosyltransferase 2 OS=Vitis vinifera (Grape) PE=1 SV=2	UDP-glucose: flavonoid 3-O-glucosyltransferase [Vitis labrusca]	Aquilegia flabellata putative UDP-glucose:flavonoid 3-O-glucosyltransferase (UF3GT) mRNA, partial cds
EVM0012552	Dispersed	darkseagreen4	BZ1	Flavonoids biosynthesis pathway	K12930|1.65664e-170|pop:POPTR_0013s12310g|UDP-glucoronosyl/UDP-glucosyl transferase family protein; K12930 anthocyanidin 3-O-glucosyltransferase [EC:2.4.1.115] (A)	Biological Process: anthocyanin-containing compound biosynthetic process (GO:0009718);; Biological Process: quercetin O-glucoside biosynthetic process (GO:0033303);; Biological Process: kaempferol O-glucoside biosynthetic process (GO:0033330);; Biological Process: cyanidin 3-O-glucoside biosynthetic process (GO:0033485);; Molecular Function: anthocyanidin 3-O-glucosyltransferase activity (GO:0047…	UDP-glucoronosyl and UDP-glucosyl transferase	Anthocyanidin 3-O-glucosyltransferase 2 OS=Fragaria ananassa (Strawberry) PE=1 SV=1	UDP-glucoronosyl/UDP-glucosyl transferase family protein [Populus trichocarpa]	Vitis labrusca x Vitis vinifera KyUFGT1 gene for UDP-glucose:flavonoid 3-O-glucosyltransferase, complete cds
EVM0021545	Proximal	grey60	BZ1	Flavonoids biosynthesis pathway	K12930|0|pop:POPTR_0013s12310g|UDP-glucoronosyl/UDP-glucosyl transferase family protein; K12930 anthocyanidin 3-O-glucosyltransferase [EC:2.4.1.115] (A)	Biological Process: anthocyanin-containing compound biosynthetic process (GO:0009718);; Biological Process: quercetin O-glucoside biosynthetic process (GO:0033303);; Biological Process: kaempferol O-glucoside biosynthetic process (GO:0033330);; Biological Process: cyanidin 3-O-glucoside biosynthetic process (GO:0033485);; Molecular Function: anthocyanidin 3-O-glucosyltransferase activity (GO:0047…	UDP-glucoronosyl and UDP-glucosyl transferase	Anthocyanidin 3-O-glucosyltransferase 2 OS=Fragaria ananassa (Strawberry) PE=1 SV=1	UDP-glucoronosyl/UDP-glucosyl transferase family protein [Populus trichocarpa]	Vitis labrusca x Vitis vinifera KyUFGT1 gene for UDP-glucose:flavonoid 3-O-glucosyltransferase, complete cds
EVM0023082	Dispersed	grey60	ANS	Flavonoids biosynthesis pathway	K05277|0|cit:102577958|anthocyanidin synthase; K05277 leucoanthocyanidin dioxygenase [EC:1.14.11.19] (A)	Biological Process: vacuole organization (GO:0007033);; Biological Process: anthocyanin-containing compound biosynthetic process (GO:0009718);; Biological Process: proanthocyanidin biosynthetic process (GO:0010023);; Molecular Function: oxidoreductase activity, acting on single donors with incorporation of molecular oxygen, incorporation of two atoms of oxygen (GO:0016702);; Molecular Function: l…	non-haem dioxygenase in morphine synthesis N-terminal	Leucoanthocyanidin dioxygenase GN=ANS OS=Malus domestica (Apple) PE=2 SV=1	anthocyanidin synthase [Paeonia suffruticosa]	Vitis vinifera anthocyanidin synthase (ANS) mRNA, complete cds
